# Supplementary material for: Hetero-Diels–Alder reactions of 2H-phospholes with allenes: synthesis and functionalization of 6-methylene-1-phosphanorbornenes
Source: Royal Society of Chemistry journal article supplement (doi:10.1039/d1qo00535a), 2021-01-01
Supplement: d1qo00535a1.pdf [file d1qo00535a1.pdf]

## Supporting Information

### **Hetero-Diels-Alder Reactions of 2*H*-Phospholes with Allenes: Synthesis and Functionalization of 6-Methylene-1- phosphanorbornenes**

Keke Zhang, Qiaoyu Zhang, Donghui Wei, Rongqiang Tian,\* Zheng Duan\*

*College of Chemistry, Green Catalysis Center, International Phosphorus Laboratory, International Joint Research Laboratory for Functional Organophosphorus Materials of Henan Province, Zhengzhou University, Zhengzhou 450001, P. R. China*

\*E-mail: tianrq@zzu.edu.cn (R. Tian).

\*E-mail: duanzheng@zzu.edu.cn (Z. Duan).

## Table of Contents

|                                                         |    |
|---------------------------------------------------------|----|
| General information .....                               | 3  |
| Experimental Procedures and Characterization Data ..... | 4  |
| X-ray crystallographic studies of compound 4a .....     | 21 |
| X-ray crystallographic studies of compound 6b .....     | 24 |
| X-ray crystallographic studies of compound 7 .....      | 28 |
| X-ray crystallographic studies of compound 8 .....      | 32 |
| Computational Methods and Results .....                 | 40 |
| NMR spectrums .....                                     | 55 |

## General information

All reactions were performed under nitrogen using solvents dried by standard methods. NMR spectra were obtained using Bruker AV300 spectrometer. All spectra were recorded in CDCl<sub>3</sub> and (CD<sub>3</sub>)<sub>2</sub>SO. All coupling constants (*J* values) were reported in hertz (Hz). Chemical shifts were expressed in parts per million (ppm) downfield from internal TMS (<sup>1</sup>H). HRMS spectra were obtained on an Agilent 1290-6540 UHPLC Q-ToF HRMS spectrometer. X-ray crystallographic analyses were performed on an Oxford diffraction Gemini E diffractometer. Melting Point: heating rate: 4°C/min, the thermometer was not corrected. Silica gel (200-300 mesh) was used for the chromatographic separations. All commercially available reagents were used without further purification. All new compounds were synthetic in small scale, and were purified by column chromatography. Compounds **1a-1d**<sup>1</sup> and **2a-2f**<sup>2</sup> were prepared according to literature method. The purity of the new compounds are acceptable according to NMR spectra analysis.

## Experimental Procedures and Characterization Data

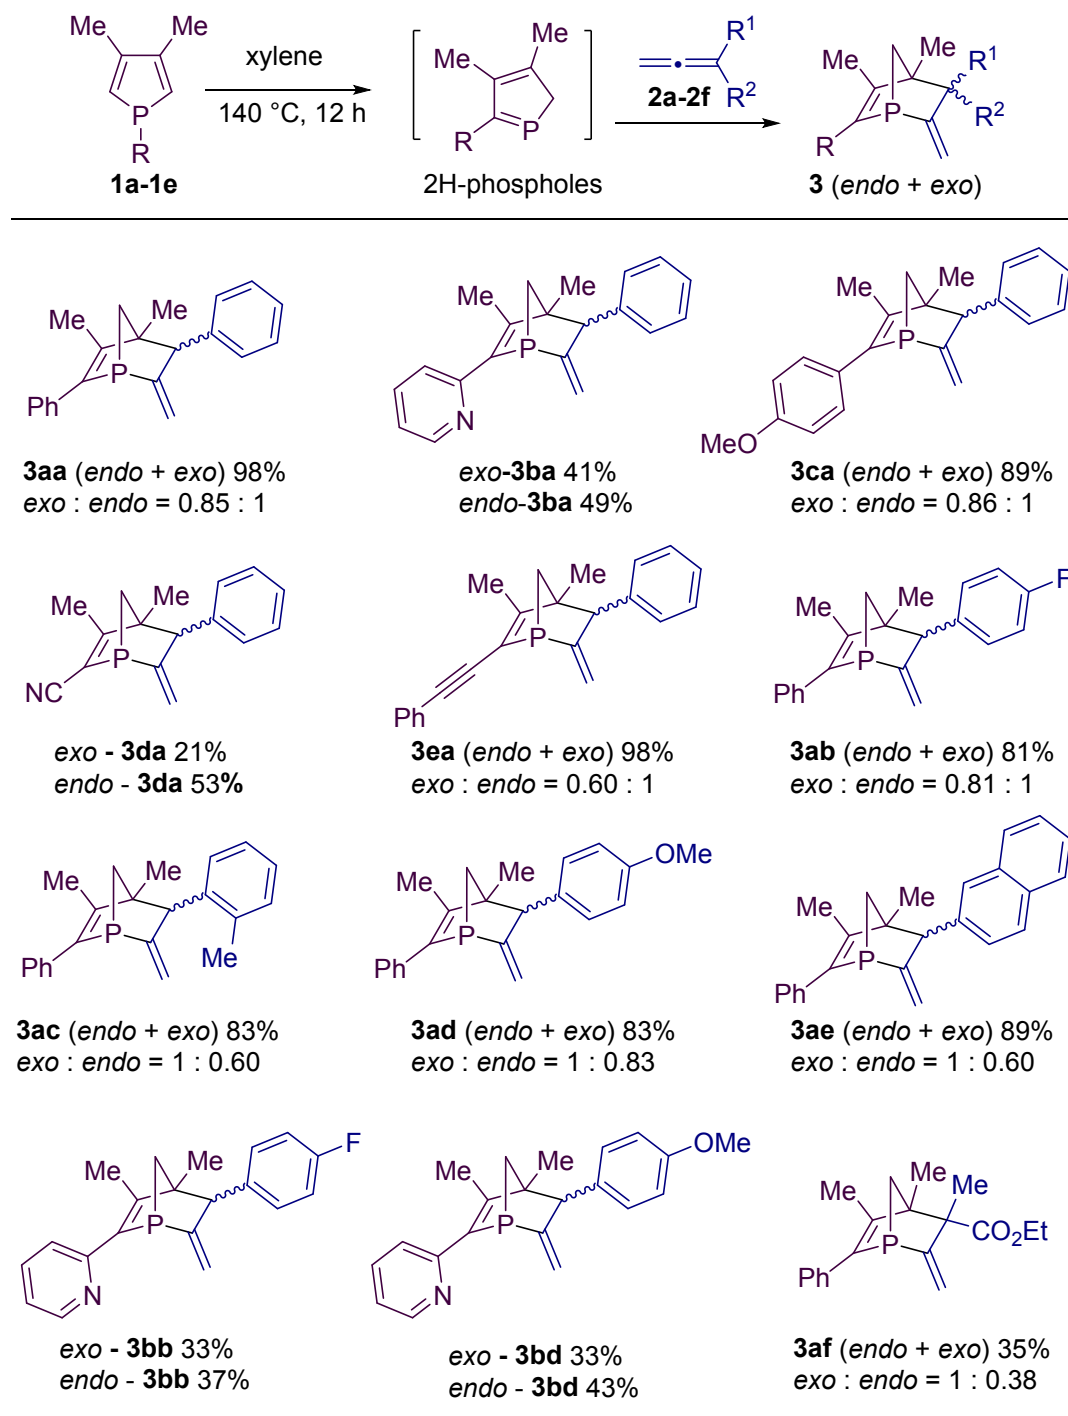

### General procedure for the reaction of phosphole 1 with allenes 2

A solution of phosphole **1** (0.5 mmol) and allenes **2** (1 mmol) in xylenes (5 mL) was stirred at 140 °C in oil bath for 12 h under nitrogen. The resulting solution was evaporated to dryness and the crude product was purified by column chromatography providing **3**.

**3aa** (*endo* + *exo*) colorless liquid, dichloromethane/petroleum ether = 1:10,  $R_f$  = 0.40, 149 mg, 98%.  $^{31}\text{P}\{^1\text{H}\}$  NMR ( $\text{CDCl}_3$ ; 121 MHz):  $\delta$  -15.7 (*exo*), -15.2 (*endo*), *exo:endo* = 0.85:1.  $^1\text{H}$  NMR ( $\text{CDCl}_3$ ; 300 MHz):  $\delta$  0.97 (s, 2.57H,  $\text{CH}_3$ , *exo*), 1.28 (s, 3H,  $\text{CH}_3$ , *endo*), 1.31 (s, 3H,  $\text{CH}_3$ , *endo*), 1.52-1.60 (m, 1.84H,  $\text{CH}_2$ , *exo* + *endo*), 1.76-1.86 (m, 1.87H,  $\text{CH}_2$ , *exo* + *endo*), 1.89 (s, 2.52H,  $\text{CH}_3$ , *exo*), 3.14 (s, 0.85H, CH, *exo*), 3.46 (s, 1H, CH, *endo*), 5.29 (d,  $J$  = 24.3 Hz, 0.85H,  $\text{CH}_2$ , *exo*), 5.40 (d,  $J$  = 24.3 Hz, 1H,  $\text{CH}_2$ , *endo*), 5.94 (*pseudo-t*,  $J$  = 12.5 Hz, 1.82H,  $\text{CH}_2$  *exo* + *endo*), 6.96-7.42 (m, 18.7H, CH, *exo* + *endo*).  $^{13}\text{C}\{^1\text{H}\}$  NMR ( $\text{CDCl}_3$ ; 75 MHz):  $\delta$  12.9 (s,  $\text{CH}_3$ , *exo*), 16.1 (s,  $\text{CH}_3$ , *endo*), 20.4 (s,  $\text{CH}_3$ , *endo*), 21.0 (s,  $\text{CH}_3$ , *exo*), 44.4 (d,  $J_{\text{CP}}$  = 2.4 Hz,  $\text{CH}_2$ , *exo*), 50.8 (d,  $J_{\text{CP}}$  = 0.7 Hz,  $\text{CH}_2$ , *endo*), 53.6 (d,  $J_{\text{CP}}$  = 2.4 Hz, CH, *exo*), 57.1 (d,  $J_{\text{CP}}$  = 1.8 Hz, CH, *endo*), 64.0 (d,  $J_{\text{CP}}$  = 5.9 Hz, C, *exo*), 64.6 (d,  $J_{\text{CP}}$  = 5.5 Hz, C, *endo*), 121.3 (d,  $J_{\text{CP}}$  = 29.1 Hz,  $\text{CH}_2$ , *endo*), 122.7 (d,  $J_{\text{CP}}$  = 29.8 Hz,  $\text{CH}_2$ , *exo*), 126.4 (s, CH, *endo*), 126.5 (s, CH, *exo*), 126.6 (s, CH, *exo*), 127.8 (s, CH, *endo*), 128.0 (s, CH, *endo*), 128.1 (s, CH, *exo*), 128.2 (s, CH, *endo*), 128.3 (s, CH, *endo*), 128.5 (s, CH, *exo*), 128.6 (s, CH, *exo*), 129.7 (s, CH, *exo*), 130.1 (s, CH, *endo*), 138.9 (d,  $J_{\text{CP}}$  = 8.0 Hz, C, *endo*), 139.1 (d,  $J_{\text{CP}}$  = 7.4 Hz, C, *exo*), 140.0 (d,  $J_{\text{CP}}$  = 16.7 Hz, C, *endo*), 141.4 (s, C, *endo*), 141.7 (d,  $J_{\text{CP}}$  = 15.8 Hz, C, *exo*), 142.8 (s, C, *exo*), 151.7 (d,  $J_{\text{CP}}$  = 1.3 Hz, C, *exo*), 154.6 (d,  $J_{\text{CP}}$  = 1.3 Hz, C, *endo*), 156.7 (d,  $J_{\text{CP}}$  = 19.6 Hz, C, *endo*), 159.1 (d,  $J_{\text{CP}}$  = 20.1 Hz, C, *exo*). HRMS (ESI)  $m/z$ :  $[\text{M}+\text{H}]^+$  Calcd for  $\text{C}_{21}\text{H}_{22}\text{P}$  305.1454; Found 305.1454.

*exo*-**3ba**: colorless liquid, ethyl acetate/petroleum ether = 1:15,  $R_f$  = 0.20, 50 mg, 41%.  $^{31}\text{P}\{^1\text{H}\}$  NMR ( $\text{CDCl}_3$ ; 121 MHz):  $\delta$  -18.41.  $^1\text{H}$  NMR ( $\text{CDCl}_3$ ; 300 MHz):  $\delta$  0.99 (s, 3H,  $\text{CH}_3$ ), 1.55-1.63 (m, 1H,  $\text{CH}_2$ ), 1.80-1.88 (m, 1H,  $\text{CH}_2$ ), 2.12 (s, 3H,  $\text{CH}_3$ ), 3.19 (s, H, CH), 5.41 (d,  $J$  = 32.0 Hz, 1H,  $\text{CH}_2$ ), 6.03 (d,  $J$  = 13.4 Hz, 1H,  $\text{CH}_2$ ), 7.06-7.10 (m, 1H, CH), 7.15-7.20 (m, 2H, CH), 7.23-7.37 (m, 4H, CH), 7.60-7.65 (m, 1H, CH), 8.61-8.62 (s, 1H, CH).  $^{13}\text{C}\{^1\text{H}\}$  NMR ( $\text{CDCl}_3$ ; 75 MHz):  $\delta$  13.1 (s,  $\text{CH}_3$ ), 20.2 (s,  $\text{CH}_3$ ), 44.0 (d,  $J_{\text{CP}}$  = 2.2 Hz,  $\text{CH}_2$ ), 53.5 (d,  $J_{\text{CP}}$  = 2.4 Hz, CH), 64.5 (d,  $J_{\text{CP}}$  = 6.1 Hz, C), 120.9 (s, CH), 122.9 (d,  $J_{\text{CP}}$  = 1.7 Hz, CH), 123.1 (d,  $J_{\text{CP}}$  = 29.9 Hz,  $\text{CH}_2$ ), 126.4 (s, CH), 128.0 (s, CH), 130.0 (s, CH), 135.9 (s, CH), 141.4 (d,  $J_{\text{CP}}$  = 15.2 Hz, C), 142.6 (s, C), 149.3 (s, CH), 157.6 (d,  $J_{\text{CP}}$  = 20.9 Hz, C), 158.5 (d,  $J_{\text{CP}}$  = 19.8 Hz, C), 159.1 (d,

$J_{CP} = 1.9$  Hz, C). **HRMS** (ESI)  $m/z$ :  $[M+H]^+$  Calcd for  $C_{20}H_{21}NP$  306.1406; Found 306.1407.

**endo-3ba**: colorless liquid, ethyl acetate/petroleum ether = 1:15,  $R_f = 0.25$ , 75 mg, 49%.  $^{31}P\{^1H\}$  NMR ( $CDCl_3$ ; 121 MHz):  $\delta$  -17.7.  $^1H$  NMR ( $CDCl_3$ ; 300 MHz):  $\delta$  1.35 (s, 3H,  $CH_3$ ), 1.45 (s, 3H,  $CH_3$ ), 1.56-1.64 (m, 1H,  $CH_2$ ), 1.83-1.90 (m, 1H,  $CH_2$ ), 3.52 (d, H,  $J = 2.3$  Hz, CH), 5.33 (d,  $J = 31.7$  Hz, 1H,  $CH_2$ ), 5.98 (dd,  $J = 13.1$  Hz,  $J = 1.3$  Hz, 1H,  $CH_2$ ), 6.95-6.97 (m, 2H, CH), 7.09-7.14 (m, 1H, CH), 7.17-7.22 (m, 3H, CH), 7.35-7.38 (m, 1H, CH), 7.63-7.69 (m, 1H, CH), 8.64-8.66 (s, 1H, CH).  $^{13}C\{^1H\}$  NMR ( $CDCl_3$ ; 75 MHz):  $\delta$  16.4 (s,  $CH_3$ ), 20.7 (s,  $CH_3$ ), 50.4 (d,  $J_{CP} = 0.9$  Hz,  $CH_2$ ), 57.2 (d,  $J_{CP} = 2.0$  Hz, CH), 65.0 (d,  $J_{CP} = 5.6$  Hz, C), 120.9 (s, Ph, CH), 121.4 (d,  $J_{CP} = 29.4$  Hz,  $CH_2$ ), 123.1 (d,  $J_{CP} = 7.9$  Hz, CH), 126.5 (s, CH), 127.8 (s, CH), 129.7 (s, CH), 136.9 (s, CH), 140.1 (d,  $J_{CP} = 16.1$  Hz, C), 141.1 (s, C), 149.5 (s, CH), 156.1 (d,  $J_{CP} = 1.9$  Hz, C), 156.4 (d,  $J_{CP} = 19.4$  Hz, C), 157.6 (d,  $J_{CP} = 21.2$  Hz, C). **HRMS** (ESI)  $m/z$ :  $[M+H]^+$  Calcd for  $C_{20}H_{21}NP$  306.1406; Found 306.1405.

**3ca**: colorless liquid, ethyl acetate/petroleum ether = 1:10,  $R_f = 0.35$ , 148 mg, 89%.  $^{31}P\{^1H\}$  NMR ( $CDCl_3$ ; 121 MHz):  $\delta$  -16.9 (exo), -16.3 (endo), exo:endo = 0.86:1.  $^1H$  NMR ( $CDCl_3$ ; 300 MHz):  $\delta$  0.96 (s, 2.57H,  $CH_3$ , exo), 1.27 (s, 3H,  $CH_3$ , endo), 1.30 (s, 3H,  $CH_3$ , endo), 1.51-1.58 (m, 1.87H,  $CH_2$ , exo + endo), 1.74-1.84 (m, 1.86H,  $CH_2$ ), 1.88 (s, 2.59H,  $CH_3$ , exo), 3.14 (s, 0.68H, CH, exo), 3.45 (s, 1H, CH, endo), 3.77 (s, 2.60H,  $OCH_3$ , exo), 3.79 (s, 3H,  $OCH_3$ , endo), 5.29 (d,  $J = 31.5$  Hz, 1H,  $CH_2$ , endo), 5.37 (d,  $J = 31.6$  Hz, 0.85H,  $CH_2$ , exo), 5.91 (*pseudo-t*,  $J = 12.9$  Hz, 1.85H,  $CH_2$  exo + endo), 7.09-7.49 (m, 16.81H, CH, exo + endo).  $^{13}C\{^1H\}$  NMR ( $CDCl_3$ ; 75 MHz):  $\delta$  12.9 (s,  $CH_3$ , exo), 16.0 (s,  $CH_3$ , endo), 20.5 (s,  $CH_3$ , exo), 21.0 (s,  $CH_3$ , endo), 44.2 (s,  $CH_2$ , exo), 50.5 (s,  $CH_2$ , endo), 53.6 (d,  $J_{CP} = 2.4$  Hz, CH, exo), 55.3 (s,  $OCH_3$ , exo + endo), 57.1 (d,  $J_{CP} = 1.5$  Hz, CH, endo), 63.9 (d,  $J_{CP} = 5.9$  Hz, C, exo), 64.5 (d,  $J_{CP} = 5.4$  Hz, C, endo), 113.7 (s, CH, exo), 113.8 (s, CH, endo), 121.1 (d,  $J_{CP} = 29.0$  Hz,  $CH_2$ , endo), 122.5 (d,  $J_{CP} = 29.6$  Hz,  $CH_2$ , exo), 126.4 (s, CH, exo), 126.6 (s, CH, endo), 127.8 (s, CH, exo), 128.0 (s, CH, endo), 129.3 (d,  $J_{CP} = 7.4$  Hz, CH, exo), 129.7 (s, CH, exo), 129.8 (d,  $J_{CP} = 7.7$  Hz, CH, endo), 130.1 (s, CH, endo), 131.2 (d,  $J_{CP} = 20.9$  Hz, C, exo), 131.4 (d,  $J_{CP} = 20.6$  Hz, C, endo), 139.3 (d,

$J_{CP} = 16.2$  Hz, C, endo), 141.1 (d,  $J_{CP} = 15.2$  Hz, C, exo), 141.5 (s, C, endo), 142.9 (s, C, exo), 150.3 (s, C, exo), 153.2 (s, C, endo), 156.7 (d,  $J_{CP} = 20.1$  Hz, C, endo), 158.2 (s, C, exo + endo), 159.2 (d, C,  $J_{CP} = 20.0$  Hz, exo). **HRMS** (ESI) m/z:  $[M+H]^+$  Calcd for  $C_{22}H_{24}OP$  355.1559; Found 355.1557.

**exo-3da**: light yellow liquid, ethyl acetate/petroleum ether = 1:10,  $R_f = 0.24$ , 27 mg, 21%.  $^{31}P\{^1H\}$  NMR ( $CDCl_3$ ; 121 MHz):  $\delta$  -18.2.  $^1H$  NMR ( $CDCl_3$ ; 300 MHz):  $\delta$  0.94 (s, 3H,  $CH_3$ ), 1.56-1.63 (m, 1H,  $CH_2$ ), 1.81-1.96 (m, 1H,  $CH_2$ ), 2.15 (s, 3H,  $CH_3$ ), 3.05 (s, 1H, CH), 5.46 (d,  $J = 33.3$  Hz, 1H,  $CH_2$ ), 6.01 (dd,  $J = 13.8$  Hz,  $J = 1.7$  Hz, 1H,  $CH_2$ ), 6.84-6.87 (m, 2H, CH), 7.09-7.12 (m, 2H, CH), 7.23-7.34 (m, 3H, CH).  $^{13}C\{^1H\}$  NMR ( $CDCl_3$ ; 75 MHz):  $\delta$  16.0 (s,  $CH_3$ ), 19.1 (s,  $CH_3$ ), 45.1 (d,  $J_{CP} = 4.4$  Hz,  $CH_2$ ), 52.5 (d,  $J_{CP} = 2.3$  Hz, CH), 63.1 (d,  $J_{CP} = 6.7$  Hz, C), 113.4 (d,  $J_{CP} = 21.2$  Hz, C), 117.2 (d,  $J_{CP} = 25.6$  Hz, C), 126.0 (d,  $J_{CP} = 31.3$  Hz,  $CH_2$ ), 127.1 (s, CH), 128.3 (s, CH), 129.9 (s, CH), 140.7 (s, C), 154.9 (d,  $J_{CP} = 20.0$  Hz, C), 180.2 (s, C). **HRMS** (ESI) m/z:  $[M+H]^+$  Calcd for  $C_{16}H_{17}NP$  254.1093; Found 254.1092.

**endo-3da**: light yellow liquid, ethyl acetate/petroleum ether = 1:10,  $R_f = 0.28$ , 66 mg, 53%.  $^{31}P\{^1H\}$  NMR ( $CDCl_3$ ; 121 MHz):  $\delta$  -18.0.  $^1H$  NMR ( $CDCl_3$ ; 300 MHz):  $\delta$  1.32 (s, 3H,  $CH_3$ ), 1.50 (s, 3H,  $CH_3$ ), 1.59-1.67 (m, 1H,  $CH_2$ ), 1.79-1.85 (m, 1H,  $CH_2$ ), 3.55 (t, 1H,  $J = 2.4$  Hz, CH), 5.40 (dd,  $J = 24.1$  Hz,  $J = 2.0$  Hz, 1H,  $CH_2$ ), 6.00 (dd,  $J = 13.7$  Hz,  $J = 2.1$  Hz, 1H,  $CH_2$ ), 6.91-6.93 (m, 2H, CH), 7.21-7.30 (m, 3H, CH).  $^{13}C\{^1H\}$  NMR ( $CDCl_3$ ; 75 MHz):  $\delta$  19.3 (s,  $CH_3$ ), 19.6 (s,  $CH_3$ ), 50.8 (d,  $J_{CP} = 3.5$  Hz,  $CH_2$ ), 56.2 (d,  $J_{CP} = 2.0$  Hz, CH), 64.5 (d,  $J_{CP} = 6.9$  Hz, C), 111.8 (d,  $J_{CP} = 22.2$  Hz, C), 117.1 (d,  $J_{CP} = 26.0$  Hz, C), 124.4 (d,  $J_{CP} = 30.5$  Hz,  $CH_2$ ), 127.3 (s, CH), 128.2 (s, CH), 129.2 (s, CH), 139.2 (s, C), 152.8 (d,  $J_{CP} = 20.0$  Hz, C), 178.2 (s, C). **HRMS** (ESI) m/z:  $[M+H]^+$  Calcd for  $C_{16}H_{17}NP$  254.1093; Found 254.1090.

**3ea**: light yellow liquid, ethyl acetate/petroleum ether = 1:20,  $R_f = 0.35$ , 161 mg, 98%.  $^{31}P\{^1H\}$  NMR ( $CDCl_3$ ; 121 MHz):  $\delta$  -16.1 (exo), -15.4 (endo), exo:endo = 0.60:1.  $^1H$  NMR ( $CDCl_3$ ; 300 MHz):  $\delta$  0.91 (s, 1.79H,  $CH_3$ , exo), 1.25 (s, 3H,  $CH_3$ , endo), 1.44 (s, 3H,  $CH_3$ , endo), 1.49-1.59 (m, 1.59H,  $CH_2$ , exo + endo), 1.72-1.84 (m, 1.62H,  $CH_2$ ), 2.04 (s, 1.80H,  $CH_3$ , exo), 3.09 (s, 0.68H, CH, exo), 3.44 (s, 1H, CH, endo), 5.31 (d,  $J = 30.7$  Hz, 1H,  $CH_2$ , endo), 5.41 (d,  $J = 30.5$  Hz, 0.68H,  $CH_2$ , exo),

5.96 (d,  $J = 15.2$  Hz, 1H, CH<sub>2</sub>, endo), 6.00 (d,  $J = 14.9$  Hz, 0.68H, CH<sub>2</sub>, exo), 7.09-7.49 (m, 16.34H, CH, exo + endo). <sup>13</sup>C{<sup>1</sup>H} NMR (CDCl<sub>3</sub>; 75 MHz):  $\delta$  14.8 (s, CH<sub>3</sub>, exo), 18.0 (s, CH<sub>3</sub>, endo), 19.8 (s, CH<sub>3</sub>, exo), 20.3 (s, CH<sub>3</sub>, endo), 44.8 (d,  $J_{CP} = 3.6$  Hz, CH<sub>2</sub>, exo), 50.8 (d,  $J_{CP} = 2.4$  Hz, CH<sub>2</sub>, endo), 53.5 (s, CH, exo), 57.2 (s, CH, endo), 62.8 (d,  $J_{CP} = 6.8$  Hz, C, exo), 63.6 (d,  $J_{CP} = 6.3$  Hz, C, endo), 86.7 (d,  $J_{CP} = 26.1$  Hz, C, exo), 86.8 (d,  $J_{CP} = 26.5$  Hz, C, endo), 96.2 (d,  $J_{CP} = 5.2$  Hz, C, endo), 96.4 (d,  $J_{CP} = 5.0$  Hz, C, exo), 121.9 (d,  $J_{CP} = 14.2$  Hz, C, endo), 122.4 (d,  $J_{CP} = 29.6$  Hz, CH<sub>2</sub>, endo), 123.2 (d,  $J_{CP} = 13.1$  Hz, C, exo), 124.0 (d,  $J_{CP} = 1.5$  Hz, C, exo), 124.0 (d,  $J_{CP} = 1.4$  Hz, C, endo), 124.1 (d,  $J_{CP} = 30.3$  Hz, CH<sub>2</sub>, exo), 126.7 (s, CH), 126.8 (s, CH), 128.0 (s, CH), 128.2 (s, CH), 128.4 (s, CH), 129.7 (s, CH), 130.0 (s, CH), 131.5 (s, CH), 131.5 (s, CH), 131.6 (s, CH), 131.6 (s, CH), 140.8 (s, C, endo), 142.2 (s, C, exo), 155.4 (d,  $J_{CP} = 20.3$  Hz, C, endo), 157.4 (d, C,  $J_{CP} = 20.5$  Hz, exo), 164.5 (s, C, endo), 167.2 (s, C, exo). HRMS (ESI) m/z: [M+H]<sup>+</sup> Calcd for C<sub>23</sub>H<sub>22</sub>P 329.1454; Found 329.1456.

**3ab**: colorless liquid, dichloromethane /petroleum ether = 1:20, R<sub>f</sub> = 0.36, 131 mg, 81%. <sup>31</sup>P{<sup>1</sup>H} NMR (CDCl<sub>3</sub>; 121 MHz):  $\delta$  -15.9 (exo), -15.4 (endo), exo:endo = 0.81:1. <sup>1</sup>H NMR (CDCl<sub>3</sub>; 300 MHz):  $\delta$  0.97 (s, 2.42H, CH<sub>3</sub>, exo), 1.30 (s, 6H, 2CH<sub>3</sub>, endo), 1.52-1.59 (m, 1.86H, CH<sub>2</sub>, exo + endo), 1.71-1.84 (m, 1.83H, CH<sub>2</sub>, exo + endo), 1.89 (s, 2.40H, CH<sub>3</sub>, exo), 3.14 (s, 0.80H, CH, exo), 3.45 (d, 1H, CH, endo), 5.33 (dd,  $J = 31.2$  Hz,  $J = 26.6$  Hz, 1.81H, CH<sub>2</sub>, exo + endo), 5.94 (*pseudo-t*,  $J = 12.0$  Hz, 1.81H, CH<sub>2</sub>, exo + endo), 6.89-7.36 (m, 16.31H, CH, exo + endo). <sup>13</sup>C{<sup>1</sup>H} NMR (CDCl<sub>3</sub>; 75 MHz):  $\delta$  12.8 (s, CH<sub>3</sub>, exo), 16.0 (s, CH<sub>3</sub>, endo), 20.4 (s, CH<sub>3</sub>, exo), 20.9 (s, CH<sub>3</sub>, endo), 44.2 (d,  $J_{CP} = 2.6$  Hz, CH<sub>2</sub> exo), 50.6 (d,  $J_{CP} = 0.8$  Hz, CH<sub>2</sub> endo), 52.8 (d,  $J_{CP} = 2.3$  Hz, CH, exo), 56.4 (d,  $J_{CP} = 1.7$  Hz, CH, endo), 63.8 (d,  $J_{CP} = 5.5$  Hz, C, exo), 64.4 (d,  $J_{CP} = 4.7$  Hz, C, endo), 114.7 (d,  $J_{CP} = 21.0$  Hz, CH, exo), 114.8 (s,  $J_{CP} = 20.9$  Hz, CH, endo), 121.3 (d,  $J_{CP} = 29.2$  Hz, CH<sub>2</sub>, endo), 122.8 (d,  $J_{CP} = 29.8$  Hz, CH<sub>2</sub>, exo), 126.4 (s, CH, exo), 126.5 (s, CH, endo), 128.0 (d,  $J_{CP} = 7.5$  Hz, CH, exo), 128.2 (s, CH, exo), 128.3 (s, CH, endo), 128.5 (d,  $J_{CP} = 7.7$  Hz, CH, endo), 131.0 (d,  $J_{CP} = 6.5$  Hz, exo), 131.3 (d,  $J_{CP} = 7.8$  Hz, CH, endo), 137.0 (d,  $J_{CP} = 3.0$  Hz, C, endo), 138.5 (d,  $J_{CP} = 3.2$  Hz, C, exo), 138.8 (d,  $J_{CP} = 20.4$  Hz, C, endo), 138.9 (d,



$J_{CP} = 19.9$  Hz, C, exo), 140.2 (d,  $J_{CP} = 17.0$  Hz, C, endo), 141.7 (d,  $J_{CP} = 15.9$  Hz, C, exo), 151.4 (d,  $J_{CP} = 1.4$  Hz, C, endo), 154.4 (d,  $J_{CP} = 1.2$  Hz, C, exo), 156.8 (d,  $J_{CP} = 19.9$  Hz, C, endo), 159.1 (d,  $J_{CP} = 20.3$  Hz, C, exo), 161.7 (s, C,  $J_{CF} = 243.3$  Hz, exo), 161.8 (d,  $J_{CP} = 243.4$  Hz, C, endo). **HRMS** (ESI) m/z:  $[M+H]^+$  Calcd for  $C_{21}H_{21}FP$  323.1359; Found 323.1357.

**3ac**: colorless liquid, dichloromethane /petroleum ether = 1:20,  $R_f = 0.33$ , 132 mg, 83%.  $^{31}P\{^1H\}$  NMR ( $CDCl_3$ ; 121 MHz):  $\delta$  -16.8 (exo), -14.5 (endo), exo:endo = 1:0.60.  $^1H$  NMR ( $CDCl_3$ ; 300 MHz):  $\delta$  0.99 (s, 3H,  $CH_3$ , exo), 1.30 (s, 1.82H,  $CH_3$ , endo), 1.44 (s, 1.80H,  $CH_3$ , endo), 1.44-1.57 (m, 1H,  $CH_2$ , exo), 1.60-1.67 (m, 0.62H,  $CH_2$ , endo), 1.77-1.81 (m, 0.62H,  $CH_2$ , endo), 1.94 (s, 3H,  $CH_3$ , exo), 1.96-2.02 (m, 1H,  $CH_2$ , exo), 2.39 (s, 3H,  $CH_3$ , exo), 2.44 (s, 1.64H,  $CH_3$ , endo), 3.52 (s, 1H, CH, exo), 3.85 (d, 0.60H,  $J = 2.3$  Hz, CH, endo), 5.16 (d,  $J = 31.6$  Hz, 0.62H,  $CH_2$ , endo), 5.32 (d,  $J = 32.0$  Hz, 1H,  $CH_2$ , exo), 5.84 (dd,  $J = 13.1$  Hz,  $J = 1.4$  Hz, 0.62H,  $CH_2$ , endo), 5.93 (d,  $J = 13.5$  Hz, 1H,  $CH_2$ , exo), 6.81-7.35 (m, 14.7H, CH, exo + endo).  $^{13}C\{^1H\}$  NMR ( $CDCl_3$ ; 75 MHz):  $\delta$  13.0 (s,  $CH_3$ , exo), 16.4 (s,  $CH_3$ , endo), 18.9 (s,  $CH_3$ , exo), 20.7 (s,  $CH_3$ , endo), 20.8 (s,  $CH_3$ , exo), 21.2 (s,  $CH_3$ , endo), 44.8 (d,  $J_{CP} = 2.3$  Hz,  $CH_2$ , exo), 47.9 (d,  $J_{CP} = 2.6$  Hz, CH, exo), 51.2 (s,  $CH_2$ , endo), 51.7 (d,  $J_{CP} = 1.7$  Hz, CH, endo), 65.0 (d,  $J_{CP} = 5.9$  Hz, C, exo), 65.6 (d,  $J_{CP} = 5.4$  Hz, C, endo), 120.8 (d,  $J_{CP} = 29.0$  Hz,  $CH_2$ , endo), 122.6 (d,  $J_{CP} = 29.9$  Hz,  $CH_2$ , exo), 125.8 (s, CH, endo), 126.0 (s, CH, exo), 126.1 (s, CH, exo), 126.2 (s, CH, endo), 126.3 (s, CH, exo), 126.4 (s, CH, endo), 128.0 (d,  $J_{CP} = 7.5$  Hz, CH, exo), 128.2 (s, CH, exo), 128.3 (s, CH, endo), 128.5 (d,  $J_{CP} = 7.6$  Hz, CH, endo), 128.9 (s, CH, endo), 129.0 (s, CH, exo), 129.8 (s, CH, endo), 130.1 (s, CH, exo), 137.5 (s, C, exo), 137.9 (s, C, endo), 139.0 (d,  $J_{CP} = 20.4$  Hz, C, endo), 139.1 (d,  $J_{CP} = 20.0$  Hz, C, exo), 139.9 (s, C, endo), 140.1 (d,  $J_{CP} = 18.4$  Hz, C, endo), 141.3 (s, C, exo), 141.5 (d,  $J_{CP} = 15.9$  Hz, C, exo), 151.8 (d,  $J_{CP} = 1.2$  Hz, C, endo), 154.9 (d,  $J_{CP} = 1.5$  Hz, C, exo), 158.1 (d,  $J_{CP} = 19.7$  Hz, C, endo), 160.1 (d,  $J_{CP} = 20.0$  Hz, C, exo). **HRMS** (ESI) m/z:  $[M+H]^+$  Calcd for  $C_{22}H_{24}P$  319.1610; Found 319.1608.

**3ad**: colorless liquid, dichloromethane /petroleum ether = 1:20,  $R_f = 0.35$ , 139 mg, 83%.  $^{31}P\{^1H\}$  NMR ( $CDCl_3$ ; 121 MHz):  $\delta$  -16.0 (exo), -15.5 (endo), exo:endo =

1:0.83. **<sup>1</sup>H NMR** (CDCl<sub>3</sub>; 300 MHz): δ 0.98 (s, 3H, CH<sub>3</sub>, exo), 1.30 (s, 2.50H, CH<sub>3</sub>, endo), 1.31 (s, 2.51H, CH<sub>3</sub>, endo), 1.50-1.58 (m, 1.87H, CH<sub>2</sub>, exo + endo), 1.74-1.83 (m, 1.82H, CH<sub>2</sub>, exo + endo), 1.88 (s, 3H, CH<sub>3</sub>, exo), 3.11 (s, 1H, CH, exo), 3.42 (d, 0.84H, *J* = 2.3 Hz, CH, endo), 3.73 (s, 2.49H, OCH<sub>3</sub>, endo), 3.77 (s, 3H, OCH<sub>3</sub>, exo), 5.35 (dd, *J* = 31.7 Hz, *J* = 25.9 Hz, 1.84H, CH<sub>2</sub>, exo + endo), 5.89-5.98 (m, 1.84H, CH<sub>2</sub>, exo + endo), 6.73-7.35 (m, 16.36H, CH, exo + endo). **<sup>13</sup>C{<sup>1</sup>H} NMR** (CDCl<sub>3</sub>; 75 MHz): δ 12.9 (s, CH<sub>3</sub>, exo), 16.1 (s, CH<sub>3</sub>, endo), 20.4 (s, CH<sub>3</sub>, exo), 30.1 (s, CH<sub>3</sub>, endo), 44.4 (d, *J*<sub>CP</sub> = 2.3 Hz, CH<sub>2</sub>, exo), 50.6 (d, *J*<sub>CP</sub> = 0.7 Hz, CH<sub>2</sub>, endo), 52.7 (d, *J*<sub>CP</sub> = 2.4 Hz, CH, exo), 55.2 (s, OCH<sub>3</sub>, exo), 55.3 (s, OCH<sub>3</sub>, endo), 56.3 (d, *J*<sub>CP</sub> = 1.7 Hz, CH, endo), 63.9 (d, *J*<sub>CP</sub> = 5.9 Hz, C, exo), 64.3 (d, *J*<sub>CP</sub> = 5.4 Hz, C, endo), 113.2 (s, CH, endo), 113.4 (s, CH, exo), 121.0 (d, *J*<sub>CP</sub> = 29.0 Hz, CH<sub>2</sub>, endo), 122.5 (d, *J*<sub>CP</sub> = 29.7 Hz, CH<sub>2</sub>, exo), 126.3 (s, CH, endo), 128.0 (s, CH, exo), 128.1 (s, CH, exo), 128.2 (s, CH, exo), 128.3 (s, CH, endo), 128.5 (s, CH, endo), 128.6 (s, CH, endo), 130.9 (s, CH, exo), 133.3 (s, C, endo), 134.8 (s, C, exo), 138.9 (d, *J*<sub>CP</sub> = 6.4 Hz, C, endo), 139.2 (d, *J*<sub>CP</sub> = 5.8 Hz, C, exo), 139.9 (d, *J*<sub>CP</sub> = 16.8 Hz, C, endo), 141.5 (d, *J*<sub>CP</sub> = 15.5 Hz, C, exo), 151.8 (s, C, exo), 154.6 (s, C, endo), 157.0 (d, *J*<sub>CP</sub> = 19.4 Hz, C, endo), 158.2 (s, C, exo), 158.4 (s, C, endo), 159.3 (d, *J*<sub>CP</sub> = 19.8 Hz, C, exo). **HRMS** (ESI) *m/z*: [M+H]<sup>+</sup> Calcd for C<sub>21</sub>H<sub>24</sub>OP 305.1559; Found 305.1558.

**3ae**: light yellow liquid, petroleum ether, *R*<sub>f</sub> = 0.30, 158 mg, 89%. **<sup>31</sup>P{<sup>1</sup>H} NMR** (CDCl<sub>3</sub>; 121 MHz): δ -16.0 (exo), -15.5 (endo), exo:endo = 1:0.60. **<sup>1</sup>H NMR** (CDCl<sub>3</sub>; 300 MHz): δ 0.98 (s, 1.96H, CH<sub>3</sub>, exo), 1.26 (s, 3H, CH<sub>3</sub>, endo), 1.33 (s, 3H, CH<sub>3</sub>, endo), 1.56-1.63 (m, 1.70H, CH<sub>2</sub>, exo + endo), 1.79-1.97 (m, 1.72H, CH<sub>2</sub>), 1.92 (s, 2.04H, CH<sub>3</sub>, exo), 3.31 (s, 0.68H, CH, exo), 3.60 (s, 1H, CH, endo), 5.31 (d, *J* = 30.7 Hz, 1H, CH<sub>2</sub>, endo), 5.41 (d, *J* = 30.5 Hz, 0.68H, CH<sub>2</sub>, exo), 5.96 (d, *J* = 15.2 Hz, 1H, CH<sub>2</sub>, endo), 6.00 (d, *J* = 14.9 Hz, 0.68H, CH<sub>2</sub>, exo), 7.00-7.79 (m, 20.55H, CH, exo + endo). **<sup>13</sup>C{<sup>1</sup>H} NMR** (CDCl<sub>3</sub>; 75 MHz): δ 13.0 (s, CH<sub>3</sub>, exo), 16.2 (s, CH<sub>3</sub>, endo), 20.6 (s, CH<sub>3</sub>, exo), 21.1 (s, CH<sub>3</sub>, endo), 44.6 (d, *J*<sub>CP</sub> = 2.4 Hz, CH<sub>2</sub>, exo), 50.8 (s, CH<sub>2</sub>, endo), 53.8 (d, *J*<sub>CP</sub> = 2.3 Hz, CH, exo), 57.3 (s, CH, endo), 64.3 (d, *J*<sub>CP</sub> = 5.9 Hz, C, exo), 64.8 (d, *J*<sub>CP</sub> = 5.4 Hz, C, endo), 121.6 (d, *J*<sub>CP</sub> = 29.0 Hz, CH<sub>2</sub>, endo), 123.0 (d, *J*<sub>CP</sub> = 29.8 Hz, CH<sub>2</sub>, exo), 125.6 (s, CH), 125.7 (s, CH), 126.1 (s, CH), 126.1 (s, CH),

126.5 (s, CH), 126.6 (s, CH), 127.4 (s, CH), 127.6 (s, CH), 127.7 (s, CH), 127.7 (s, CH), 127.8 (s, CH), 128.1 (s, CH), 128.2 (s, CH), 128.3 (s, CH), 128.4 (s, CH), 128.7 (s, CH), 128.8 (s, CH), 128.9 (s, CH), 132.4 (s, C, exo), 132.5 (s, C, endo), 133.2 (s, C, endo), 133.4 (s, C, exo), 138.9 (d,  $J_{CP} = 19.9$  Hz, C, endo), 139.0 (s, C, endo), 139.1 (d, C,  $J_{CP} = 19.9$  Hz, exo), 140.2 (d,  $J_{CP} = 17.0$  Hz, C, endo), 140.4 (s, C, exo), 141.9 (d,  $J_{CP} = 15.8$  Hz, C, exo), 151.8 (d,  $J_{CP} = 1.2$  Hz, C, endo), 154.7 (d,  $J_{CP} = 1.1$  Hz, C, exo), 156.8 (d,  $J_{CP} = 19.7$  Hz, C, endo), 159.1 (d,  $J_{CP} = 20.1$  Hz, C, exo). **HRMS** (ESI)  $m/z$ :  $[M+H]^+$  Calcd for  $C_{25}H_{24}P$  355.1608; Found 355.1608.

**exo-3bb**: light yellow liquid, ethyl acetate/petroleum ether = 1:15,  $R_f = 0.25$ , 33 mg, 33%.  **$^{31}P\{^1H\}$  NMR** ( $CDCl_3$ ; 121 MHz):  $\delta$  -19.4.  **$^1H$  NMR** ( $CDCl_3$ ; 300 MHz):  $\delta$  0.99 (s, 3H,  $CH_3$ ), 1.58-1.64 (m, 1H,  $CH_2$ ), 1.74-1.81 (m, 1H,  $CH_2$ ), 2.10 (s, 3H,  $CH_3$ ), 3.18 (s, H, CH), 5.40 (d,  $J = 31.9$  Hz, 1H,  $CH_2$ ), 6.03 (d,  $J = 13.3$  Hz, 1H,  $CH_2$ ), 6.96-7.02 (m, 2H, CH), 7.08-7.15 (m, 3H, CH), 7.34-7.37 (m, 1H, CH), 7.61-7.66 (m, 1H, CH), 8.61-8.62 (s, 1H, CH).  **$^{13}C\{^1H\}$  NMR** ( $CDCl_3$ ; 75 MHz):  $\delta$  13.1 (s,  $CH_3$ ), 20.1 (s,  $CH_3$ ), 43.9 (d,  $J_{CP} = 2.4$  Hz,  $CH_2$ ), 52.8 (d,  $J_{CP} = 2.6$  Hz, CH), 64.4 (d,  $J_{CP} = 5.2$  Hz, C), 114.8 (d,  $J_{CF} = 21.0$  Hz, CH), 121.0 (s, CH), 122.9 (d,  $J_{CP} = 8.6$  Hz, CH), 123.2 (d,  $J_{CP} = 29.9$  Hz,  $CH_2$ ), 131.3 (d,  $J_{CP} = 7.4$  Hz, CH), 135.9 (s, CH), 138.2 (d,  $J_{CP} = 3.3$  Hz, C), 141.4 (d,  $J_{CP} = 15.2$  Hz, C), 149.3 (s, CH), 157.5 (d,  $J_{CP} = 20.9$  Hz, C), 158.4 (d,  $J_{CP} = 20.1$  Hz, C), 159.0 (d,  $J_{CP} = 1.7$  Hz, C), 161.6 (d,  $J_{CF} = 241.1$  Hz, C). **HRMS** (ESI)  $m/z$ :  $[M+H]^+$  Calcd for  $C_{20}H_{20}FNP$  324.1312; Found 324.1310

**endo-3bb**: light yellow liquid, ethyl acetate/petroleum ether = 1:15,  $R_f = 0.30$ , 60 mg, 37%.  **$^{31}P\{^1H\}$  NMR** ( $CDCl_3$ ; 121 MHz):  $\delta$  -18.5.  **$^1H$  NMR** ( $CDCl_3$ ; 300 MHz):  $\delta$  1.34 (s, 3H,  $CH_3$ ), 1.47 (s, 3H,  $CH_3$ ), 1.55-1.63 (m, 1H,  $CH_2$ ), 1.83-1.89 (m, 1H,  $CH_2$ ), 3.50 (d, H,  $J = 2.3$  Hz, CH), 5.31 (d,  $J = 31.5$  Hz, 1H,  $CH_2$ ), 5.99 (dd,  $J = 13.0$  Hz,  $J = 1.4$  Hz, 1H,  $CH_2$ ), 6.86-6.91 (m, 4H, CH), 7.11-7.14 (m, 1H, CH), 7.34-7.37 (m, 1H, CH), 7.64-7.69 (m, 1H, CH), 8.64-8.66 (s, 1H, CH).  **$^{13}C\{^1H\}$  NMR** ( $CDCl_3$ ; 75 MHz):  $\delta$  16.4 (s,  $CH_3$ ), 20.6 (s,  $CH_3$ ), 50.2 (d,  $J_{CP} = 1.0$  Hz,  $CH_2$ ), 56.5 (d,  $J_{CP} = 2.0$  Hz, CH), 64.9 (d,  $J_{CP} = 6.0$  Hz, C), 114.6 (d,  $J_{CF} = 21.1$  Hz, CH), 121.0 (s, CH), 121.5 (d,  $J_{CP} = 29.2$  Hz,  $CH_2$ ), 123.1 (d,  $J_{CP} = 8.1$  Hz, CH), 131.0 (s, CH), 136.0 (s, CH), 136.8 (s, C), 140.4 (d,  $J_{CP} = 12.6$  Hz, C), 149.5 (s, CH), 155.8 (d,  $J_{CP} = 1.7$  Hz,

C), 156.4 (d,  $J_{CP} = 19.5$  Hz, C), 157.4 (d,  $J_{CP} = 21.0$  Hz, C), 161.7 (d,  $J_{CF} = 243.3$  Hz, C). **HRMS** (ESI) m/z:  $[M+H]^+$  Calcd for  $C_{20}H_{20}FNP$  324.1312; Found 324.1314.

**exo-3bd**: light yellow liquid, ethyl acetate/petroleum ether = 1:20,  $R_f = 0.20$ , 56 mg, 33%.  $^{31}P\{^1H\}$  NMR ( $CDCl_3$ ; 121 MHz):  $\delta$  -18.5.  $^1H$  NMR ( $CDCl_3$ ; 300 MHz):  $\delta$  1.00 (s, 3H,  $CH_3$ ), 1.56-1.64 (m, 1H,  $CH_2$ ), 1.77-1.85 (m, 1H,  $CH_2$ ), 2.11 (s, 3H,  $CH_3$ ), 3.17 (s, H, CH), 3.81 (s, 3H,  $OCH_3$ ), 5.42 (d,  $J = 32.0$  Hz, 1H,  $CH_2$ ), 6.03 (d,  $J = 13.4$  Hz, 1H,  $CH_2$ ), 6.84-6.87 (m, 2H, CH), 7.08-7.11 (m, 3H, CH), 7.35-7.38 (m, 1H, CH), 7.61-7.67 (m, 1H, CH), 8.61-8.63 (s, 1H, CH).  $^{13}C\{^1H\}$  NMR ( $CDCl_3$ ; 75 MHz):  $\delta$  13.1 (s,  $CH_3$ ), 20.2 (s,  $CH_3$ ), 44.0 (d,  $J_{CP} = 2.2$  Hz,  $CH_2$ ), 52.7 (d,  $J_{CP} = 2.6$  Hz, CH), 55.2 (s,  $OCH_3$ ), 64.5 (d,  $J_{CP} = 6.0$  Hz, C), 113.4 (s, CH), 120.9 (s, CH), 122.8 (s,  $J_{CP} = 8.7$  Hz, CH), 122.9 (d,  $J_{CP} = 30.0$  Hz,  $CH_2$ ), 130.8 (s, CH), 134.6 (s, C), 135.9 (s, CH), 141.2 (d,  $J_{CP} = 15.0$  Hz, C), 149.3 (s, CH), 157.7 (d,  $J_{CP} = 21.2$  Hz, C), 158.2 (s, C), 158.7 (d,  $J_{CP} = 19.7$  Hz, C), 159.2 (d,  $J_{CP} = 1.8$  Hz, C). **HRMS** (ESI) m/z:  $[M+H]^+$  Calcd for  $C_{21}H_{22}NOP$  336.1512; Found 336.1513.

**endo-3bd**: light yellow liquid, ethyl acetate/petroleum ether = 1:20,  $R_f = 0.25$ , 72 mg, 43%.  $^{31}P$  NMR ( $CDCl_3$ ; 121 MHz):  $\delta$  -18.0.  $^1H$  NMR ( $CDCl_3$ ; 300 MHz):  $\delta$  1.33 (s, 3H,  $CH_3$ ), 1.48 (s, 3H,  $CH_3$ ), 1.54-1.61 (m, 1H,  $CH_2$ ), 1.82-1.88 (m, 1H,  $CH_2$ ), 3.46 (t, 1H,  $J = 2.3$  Hz, CH), 3.75 (s, 3H,  $OCH_3$ ), 5.32 (d,  $J = 31.7$  Hz, 1H,  $CH_2$ ), 5.97 (dd,  $J = 13.0$  Hz,  $J = 1.1$  Hz, 1H,  $CH_2$ ), 6.73-6.75 (m, 2H, CH), 6.86-6.89 (m, 2H, CH), 7.08-7.12 (m, 1H, CH), 7.35-7.37 (m, 1H, CH), 7.62-7.66 (m, 1H, CH), 8.64-8.65 (s, 1H, CH).  $^{13}C$  NMR ( $^1H$ ) ( $CDCl_3$ ; 75 MHz):  $\delta$  16.5 (s,  $CH_3$ ), 20.7 (s,  $CH_3$ ), 50.2 (d,  $J_{CP} = 0.8$  Hz,  $CH_2$ ), 55.1 (s,  $OCH_3$ ), 56.5 (d,  $J_{CP} = 2.0$  Hz, CH), 64.8 (d,  $J_{CP} = 5.5$  Hz, C), 113.1 (s, CH), 120.9 (s, CH), 121.2 (d,  $J_{CP} = 29.4$  Hz,  $CH_2$ ), 123.0 (d,  $J_{CP} = 7.9$  Hz, CH), 130.5 (s, CH), 133.0 (s, C), 135.9 (s, CH), 140.0 (d,  $J_{CP} = 16.1$  Hz, C), 149.4 (s, CH), 156.2 (d,  $J_{CP} = 1.7$  Hz, C), 156.7 (d,  $J_{CP} = 19.2$  Hz, C), 157.6 (d,  $J_{CP} = 21.1$  Hz, C), 158.3 (s, C). **HRMS** (ESI) m/z:  $[M+H]^+$  Calcd for  $C_{21}H_{22}NOP$  336.1512; Found 336.1511.

**3af** colorless liquid, dichloromethane/petroleum ether = 1:20,  $R_f = 0.45$ , 55 mg, 35%.  $^{31}P\{^1H\}$  NMR ( $CDCl_3$ ; 121 MHz):  $\delta$  -19.6 (exo), -15.2 (endo), exo:endo = 1:0.38.  $^1H$  NMR ( $CDCl_3$ ; 300 MHz):  $\delta$  1.11 (t,  $J = 7.1$  Hz, 1.13 H,  $CH_3$ , endo), 1.21 (s,

3H, CH<sub>3</sub>, exo), 1.27 (t, *J* = 7.1 Hz, 3H, CH<sub>3</sub>, exo), 1.35 (s, 3H, CH<sub>3</sub>, exo), 1.46 (s, 1.13H, CH<sub>3</sub>, endo), 1.47 (s, 1.14H, CH<sub>3</sub>, endo), 1.58-1.64 (m, 1.77H, CH<sub>2</sub>, exo + endo), 1.69 (s, 1.16H, CH<sub>3</sub>, endo), 1.90 (s, 3H, CH<sub>3</sub>, exo), 2.36-2.43 (m, 1H, CH<sub>2</sub>, exo + endo), 3.94-4.23 (m, 2.78H, CH<sub>2</sub>, exo + endo), 5.51 (d, *J* = 30.9 Hz, 1H, CH<sub>2</sub>, exo), 5.55 (d, *J* = 32.5 Hz, 0.38H, CH<sub>2</sub>, endo), 5.86 (d, *J* = 12.9 Hz, 1H, CH<sub>2</sub>, exo), 5.91 (d, *J* = 14.0 Hz, 0.38H, CH<sub>2</sub>, endo), 7.21-7.35 (m, 6.92H, CH, exo + endo). <sup>13</sup>C{<sup>1</sup>H} NMR (CDCl<sub>3</sub>; 75 MHz): δ 13.9 (s, CH<sub>3</sub>, endo), 14.2 (s, CH<sub>3</sub>, exo), 14.6 (s, CH<sub>3</sub>, endo), 16.5 (s, CH<sub>3</sub>, exo), 17.8 (s, CH<sub>3</sub>, exo), 17.9 (s, CH<sub>3</sub>, endo), 22.3 (s, CH<sub>3</sub>, exo), 23.5 (s, CH<sub>3</sub>, endo), 47.1 (s, CH<sub>2</sub>, endo), 47.4 (s, CH<sub>2</sub>, exo), 54.5 (d, *J*<sub>CP</sub> = 2.0 Hz, C, endo), 55.4 (d, *J*<sub>CP</sub> = 2.2 Hz, C, exo), 60.7 (s, CH<sub>2</sub>, endo), 60.9 (s, CH<sub>2</sub>, exo), 65.9 (d, *J*<sub>CP</sub> = 5.7 Hz, C, endo), 66.2 (d, *J*<sub>CP</sub> = 6.3 Hz, C, exo), 120.7 (d, *J*<sub>CP</sub> = 29.3 Hz, CH<sub>2</sub>, exo), 122.7 (d, *J*<sub>CP</sub> = 30.6 Hz, CH<sub>2</sub>, endo), 126.3 (s, CH), 126.5 (s, CH), 128.0 (s, CH), 128.1 (s, CH), 128.3 (s, CH), 128.4 (s, CH), 138.6 (d, *J*<sub>CP</sub> = 20.1 Hz, C, exo), 138.8 (d, *J*<sub>CP</sub> = 20.0 Hz, C, endo), 141.7 (d, *J*<sub>CP</sub> = 16.4 Hz, C, exo), 141.8 (d, *J*<sub>CP</sub> = 16.0 Hz, C, endo), 152.5 (s, C, endo), 153.3 (s, C, exo), 156.6 (d, *J*<sub>CP</sub> = 20.3 Hz, C, endo), 157.9 (d, *J*<sub>CP</sub> = 22.7 Hz, C, endo), 174.7 (s, CO, endo), 175.1 (s, CO, exo). HRMS (ESI) *m/z*: [M+H]<sup>+</sup> Calcd for C<sub>19</sub>H<sub>23</sub>O<sub>2</sub>P 315.1508; Found 315.1509.

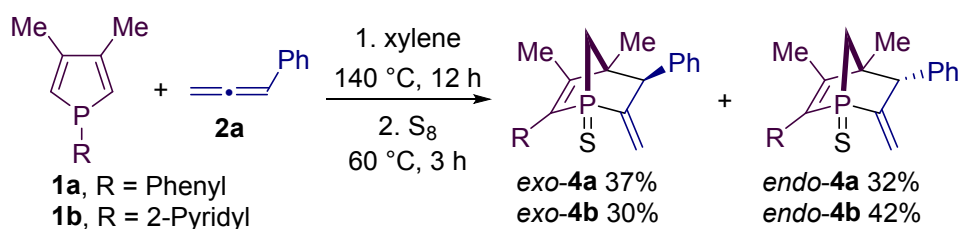

A solution of phosphole **1** (10 mmol) and allenes **2** (20 mmol) in xylenes (20 mL) was stirred at 140 °C in oil bath for 12 h under nitrogen. When the reaction liquid return to room temperature, add S<sub>8</sub> (11 mmol) powder to the solution, and place it in a 60 °C oil bath for 3 hours. The resulting solution was evaporated to dryness and the crude product was purified by column chromatography providing **4**.

**exo-4a**: white solid, m.p. 188.5-189.2 °C. ethyl acetate/petroleum ether = 1:10, R<sub>f</sub> = 0.35, 1.25 g, 37%. <sup>31</sup>P NMR (CDCl<sub>3</sub>; 121 MHz): δ 47.2. <sup>1</sup>H NMR (CDCl<sub>3</sub>; 300

MHz):  $\delta$  1.00 (s, 3H, CH<sub>3</sub>), 1.97 (d,  $J$  = 2.5 Hz, 3H, CH<sub>3</sub>), 2.04-2.12 (m, 1H, CH<sub>2</sub>), 2.24-2.30 (m, 1H, CH<sub>2</sub>), 3.47 (dd,  $J$  = 9.2 Hz,  $J$  = 1.5 Hz, 1H, CH), 5.71 (dd,  $J$  = 41.8 Hz,  $J$  = 1.9 Hz, 1H, CH<sub>2</sub>), 6.27 (dd,  $J$  = 21.6 Hz,  $J$  = 2.5 Hz, H, CH<sub>2</sub>), 7.18-7.21 (m, 2H, CH), 7.24-7.28 (m, 3H, CH), 7.29-7.31 (m, 2H, CH), 7.33-7.40 (m, 3H, CH). **<sup>13</sup>C NMR**{<sup>1</sup>H} (CDCl<sub>3</sub>; 75 MHz):  $\delta$  14.0 (d,  $J_{CP}$  = 11.6 Hz, CH<sub>3</sub>), 19.6 (d,  $J_{CP}$  = 13.9 Hz, CH<sub>3</sub>), 47.1 (d,  $J_{CP}$  = 57.6 Hz, CH<sub>2</sub>), 49.4 (d,  $J_{CP}$  = 16.5 Hz, C), 52.7 (d,  $J_{CP}$  = 13.7 Hz, CH), 125.2 (d,  $J_{CP}$  = 8.8 Hz, CH<sub>2</sub>), 127.3 (s, CH), 127.6 (s, CH), 128.2 (s, CH), 128.4 (s, CH), 129.0 (d,  $J_{CP}$  = 5.5 Hz, CH), 129.7 (s, CH), 132.5 (d,  $J_{CP}$  = 10.1 Hz, C), 134.6 (d,  $J_{CP}$  = 69.0 Hz, C), 140.0 (d,  $J_{CP}$  = 2.9 Hz, C), 149.0 (d,  $J_{CP}$  = 64.6 Hz, C), 156.7 (d,  $J_{CP}$  = 15.9 Hz, C) **HRMS** (ESI)  $m/z$ : [M+H]<sup>+</sup> Calcd for C<sub>21</sub>H<sub>22</sub>PS 337.1174; Found 337.1172.

*endo-4a*: white solid, m.p. 155.4-156.3 °C. ethyl acetate/petroleum ether = 1:10,  $R_f$  = 0.33, 1.07 g, 32%. **<sup>31</sup>P NMR** (CDCl<sub>3</sub>; 121 MHz):  $\delta$  49.1. **<sup>1</sup>H NMR** (CDCl<sub>3</sub>; 300 MHz):  $\delta$  1.29 (d,  $J$  = 2.1 Hz, 3H, CH<sub>3</sub>), 1.41 (s, 3H, CH<sub>3</sub>), 2.05-2.11 (m, 1H, CH<sub>2</sub>), 2.32-2.39 (m, 1H, CH<sub>2</sub>), 3.72 (d,  $J$  = 2.0 Hz, 1H, CH), 5.69 (dd,  $J$  = 41.7 Hz,  $J$  = 1.1 Hz, 1H, CH<sub>2</sub>), 6.24 (dd,  $J$  = 21.6 Hz,  $J$  = 2.3 Hz, 1 H, CH<sub>2</sub>), 7.02-7.05 (m, 2H, CH), 7.25-7.26 (m, 3H, CH), 7.32-7.35 (m, 3H, CH), 7.39-7.44 (m, 2H, CH). **<sup>13</sup>C NMR**{<sup>1</sup>H} (CDCl<sub>3</sub>; 75 MHz):  $\delta$  16.0 (d,  $J_{CP}$  = 12.0 Hz, CH<sub>3</sub>), 20.1 (d,  $J_{CP}$  = 13.7 Hz, CH<sub>3</sub>), 50.2 (d,  $J_{CP}$  = 16.4 Hz, C), 54.0 (d,  $J_{CP}$  = 57.5 Hz, CH<sub>2</sub>), 56.5 (d,  $J_{CP}$  = 14.2 Hz, CH), 124.1 (d,  $J_{CP}$  = 8.3 Hz, CH<sub>2</sub>), 127.5 (s, CH), 127.6 (s, CH), 128.2 (s, CH), 128.3 (s, CH), 129.1 (s, CH), 129.3 (d,  $J_{CP}$  = 5.6 Hz, CH), 132.5 (d,  $J_{CP}$  = 9.9 Hz, C), 133.3 (d,  $J_{CP}$  = 68.3 Hz, C), 138.7 (d,  $J_{CP}$  = 5.6 Hz, C), 147.5 (d,  $J_{CP}$  = 64.4 Hz, C), 154.3 (d,  $J_{CP}$  = 14.2 Hz, C). **HRMS** (ESI)  $m/z$ : [M+H]<sup>+</sup> Calcd for C<sub>21</sub>H<sub>22</sub>PS 337.1174; Found 337.1172

*exo-4b* : white solid, m.p. 159.3-159.9 °C. ethyl acetate/petroleum ether = 1:3,  $R_f$  = 0.25, 1.01 g, 30%. **<sup>31</sup>P**{<sup>1</sup>H} **NMR** (CDCl<sub>3</sub>; 121 MHz):  $\delta$  45.9. **<sup>1</sup>H NMR** (CDCl<sub>3</sub>; 300 MHz):  $\delta$  1.01 (s, 3H, CH<sub>3</sub>), 2.05-2.11 (m, 1H, CH<sub>2</sub>), 2.17 (s, 3H, CH<sub>3</sub>), 2.25-2.31 (m, 1H, CH<sub>2</sub>), 3.51 (d,  $J$  = 8.5 Hz, 1H, CH), 5.73 (d,  $J$  = 42.2 Hz, 1H, CH<sub>2</sub>), 6.32 (d,  $J$  = 21.6 Hz, 1H, CH<sub>2</sub>), 7.18-7.20 (m, 3H, CH), 7.29-7.34 (m, 3H, CH), 7.54-7.57 (m, 1H, CH), 7.69-7.74 (m, 1H, CH), 8.64-8.66 (s, 1H, CH). **<sup>13</sup>C**{<sup>1</sup>H} **NMR** (CDCl<sub>3</sub>; 75

MHz):  $\delta$  14.2 (d,  $J_{CP} = 11.3$  Hz, CH<sub>3</sub>), 19.4 (d,  $J_{CP} = 14.1$  Hz, CH<sub>3</sub>), 47.0 (d,  $J_{CP} = 58.4$  Hz, CH<sub>2</sub>), 49.8 (d,  $J_{CP} = 16.3$  Hz, C), 52.6 (d,  $J_{CP} = 13.7$  Hz, CH), 122.2 (s, CH), 124.4 (d,  $J_{CP} = 2.9$  Hz, CH), 125.6 (d,  $J_{CP} = 8.9$  Hz, CH<sub>2</sub>), 127.4 (s, Ph, CH), 128.5 (s, CH), 129.7 (s, CH), 133.3 (d,  $J_{CP} = 69.3$  Hz, C), 136.0 (s, Ph, CH), 139.8 (d,  $J_{CP} = 2.9$  Hz, C), 148.6 (d,  $J_{CP} = 65.5$  Hz, C), 149.6 (s, Ph, CH), 152.1 (d,  $J_{CP} = 13.8$  Hz, C), 161.3 (d,  $J_{CP} = 14.3$  Hz, C). **HRMS** (ESI)  $m/z$ :  $[M+H]^+$  Calcd for C<sub>20</sub>H<sub>21</sub>NPS 338.1127; Found 338.1125.

*endo-4b* : white solid, m.p. 174.7-175.4 °C. ethyl acetate/petroleum ether = 1:3,  $R_f = 0.28$ , 1.42 g, 42% <sup>31</sup>P{<sup>1</sup>H} NMR (CDCl<sub>3</sub>; 121 MHz):  $\delta$  48.0. <sup>1</sup>H NMR (CDCl<sub>3</sub>; 300 MHz):  $\delta$  1.42 (s, 3H, CH<sub>3</sub>), 1.47 (d,  $J = 1.3$  Hz, 3H, CH<sub>3</sub>), 2.05-2.11 (m, 1H, CH<sub>2</sub>), 2.40-2.47 (m, 1H, CH<sub>2</sub>), 3.73 (s, H, CH), 5.71 (d,  $J = 42.1$  Hz, H, CH<sub>2</sub>), 6.29 (dd,  $J = 21.8$  Hz,  $J = 1.7$  Hz, H, CH<sub>2</sub>), 7.03 (s, 2H, CH), 7.18-7.22 (m, 3H, CH), 7.53-7.56 (m, 1H, CH), 7.72-7.77 (m, 1H, CH), 8.65-8.67 (s, 1H, CH). <sup>13</sup>C{<sup>1</sup>H} NMR (CDCl<sub>3</sub>; 75 MHz):  $\delta$  16.4 (d,  $J_{CP} = 11.3$  Hz, CH<sub>3</sub>), 19.8 (d,  $J_{CP} = 13.7$  Hz, CH<sub>3</sub>), 50.6 (d,  $J_{CP} = 16.1$  Hz, C), 53.5 (d,  $J_{CP} = 57.9$  Hz, CH<sub>2</sub>), 56.6 (d,  $J_{CP} = 14.3$  Hz, CH), 122.1 (s, CH), 124.2 (d,  $J_{CP} = 7.4$  Hz, CH<sub>2</sub>), 124.3 (d,  $J_{CP} = 3.1$  Hz, CH), 127.5 (s, CH), 128.2 (s, CH), 129.2 (s, CH), 132.6 (d,  $J_{CP} = 68.9$  Hz, C), 136.0 (s, CH), 138.5 (d,  $J_{CP} = 5.9$  Hz, C), 147.4 (d,  $J_{CP} = 65.1$  Hz, C), 149.7 (s, CH), 152.3 (d,  $J_{CP} = 17.9$  Hz, C), 158.8 (d,  $J_{CP} = 12.5$  Hz, C). **HRMS** (ESI)  $m/z$ :  $[M+H]^+$  Calcd for C<sub>20</sub>H<sub>21</sub>NPS 338.1127; Found 338.1125.

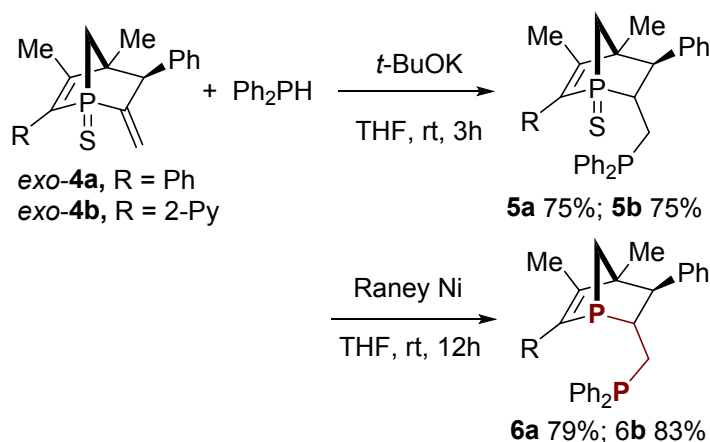

A solution of *exo-4* (1 mmol), diphenylphosphine (1.2 mmol) and *t*-BuOK (1.2 mmol) in THF (5 mL) was stirred at room temperature for 3 h under nitrogen. The

resulting solution was evaporated to dryness and the crude product was purified by column chromatography providing **5**.

**5a**: white solid, m.p. 192.9-193.3 °C. ethyl acetate/petroleum ether = 1:10,  $R_f$  = 0.35, 392 mg, 75%.  $^{31}\text{P}\{^1\text{H}\}$  NMR ( $\text{CDCl}_3$ ; 121 MHz):  $\delta$  -21.0 (d,  $J_{\text{PP}} = 30.1$  Hz), 58.7 (d,  $J_{\text{PP}} = 31.1$  Hz).  $^1\text{H}$  NMR ( $\text{CDCl}_3$ ; 300 MHz):  $\delta$  0.88 (s, 3H,  $\text{CH}_3$ ), 1.83-1.98 (m, 2H,  $\text{CH}_2$ ), 2.05 (d,  $J = 1.7$  Hz, 3H,  $\text{CH}_3$ ), 2.26-2.32 (m, 1H,  $\text{CH}_2$ ), 2.43 (s, 1H, CH), 2.76 (s, 1H, CH), 2.95-3.01 (m, 1H,  $\text{CH}_2$ ), 6.85-6.90 (m, 2H, CH), 7.09-7.13 (m, 4H, CH), 7.21-7.24 (m, 6H, CH), 7.28-7.35 (m, 4H, CH), 7.42-7.44 (s, 4H, CH).  $^{13}\text{C}\{^1\text{H}\}$  NMR ( $\text{CDCl}_3$ ; 75 MHz):  $\delta$  13.7 (d,  $J_{\text{CP}} = 11.5$  Hz,  $\text{CH}_3$ ), 19.6 (d,  $J_{\text{CP}} = 16.8$  Hz,  $\text{CH}_3$ ), 30.4 (d,  $J_{\text{CP}} = 16.9$  Hz,  $\text{CH}_2$ ), 45.0 (dd,  $J_{\text{CP}} = 44.8$  Hz,  $J_{\text{CP}} = 8.9$  Hz, CH), 47.4 (dd,  $J_{\text{CP}} = 54.1$  Hz,  $J_{\text{CP}} = 2.2$  Hz,  $\text{CH}_2$ ), 49.8 (d,  $J_{\text{CP}} = 21.3$  Hz, C), 56.3 (d,  $J_{\text{CP}} = 7.4$  Hz, CH), 127.2 (s, CH), 127.6 (s, CH), 128.1 (s, CH), 128.3 (s, CH), 128.4 (s, CH), 128.5 (s, CH), 129.2 (s, CH), 129.5 (d,  $J_{\text{CP}} = 5.3$  Hz, CH), 131.5 (s, CH), 131.7 (s, CH), 132.7 (d,  $J_{\text{CP}} = 34.3$  Hz, C), 133.2 (d,  $J_{\text{CP}} = 21.4$  Hz, C), 133.9 (s, CH), 134.2 (s, CH), 135.6 (d,  $J_{\text{CP}} = 13.8$  Hz, C), 139.2 (d,  $J_{\text{CP}} = 12.5$  Hz, C), 140.2 (d,  $J_{\text{CP}} = 5.5$  Hz, C), 157.4 (d,  $J_{\text{CP}} = 15.3$  Hz, C). HRMS (ESI)  $m/z$ :  $[\text{M}+\text{H}]^+$  Calcd for  $\text{C}_{33}\text{H}_{33}\text{P}_2\text{S}$  523.1173; Found 523.1174.

**5b**: white solid, m.p. 155.3-156.1 °C. ethyl acetate/petroleum ether = 1:5,  $R_f$  = 0.20, 390 mg, 75%.  $^{31}\text{P}\{^1\text{H}\}$  NMR ( $\text{CDCl}_3$ ; 121 MHz):  $\delta$  -21.14 (d,  $J_{\text{PP}} = 30.0$  Hz), 58.30 (d,  $J_{\text{PP}} = 30.0$  Hz).  $^1\text{H}$  NMR ( $\text{CDCl}_3$ ; 300 MHz):  $\delta$  0.89 (s, 3H,  $\text{CH}_3$ ), 1.97-2.12 (m, 2H,  $\text{CH}_2$ ), 2.20 (d,  $J = 2.3$  Hz, 3H,  $\text{CH}_3$ ), 2.67-2.33 (m, 1H,  $\text{CH}_2$ ), 2.41-2.47 (m, 1H, CH), 2.79-2.82 (m, 1H, CH), 2.90-2.99 (m, 1H,  $\text{CH}_2$ ), 6.85-6.90 (m, 2H, CH), 7.06-7.13 (m, 4H, CH), 7.20-7.22 (m, 7H, CH), 7.25-7.29 (m, 3H, CH), 7.69-7.78 (m, 2H, CH), 8.69-8.70 (m, 1H, CH).  $^{13}\text{C}\{^1\text{H}\}$  NMR ( $\text{CDCl}_3$ ; 75 MHz):  $\delta$  13.9 (d,  $J_{\text{CP}} = 11.1$  Hz,  $\text{CH}_3$ ), 19.2 (d,  $J_{\text{CP}} = 16.7$  Hz,  $\text{CH}_3$ ), 30.2 (d,  $J_{\text{CP}} = 16.7$  Hz,  $\text{CH}_2$ ), 45.0 (dd,  $J_{\text{CP}} = 45.2$  Hz,  $J_{\text{CP}} = 9.2$  Hz, CH), 47.1 (dd,  $J_{\text{CP}} = 54.8$  Hz,  $J_{\text{CP}} = 2.1$  Hz,  $\text{CH}_2$ ), 50.2 (d,  $J_{\text{CP}} = 21.0$  Hz, C), 56.1 (d,  $J_{\text{CP}} = 7.4$  Hz, CH), 122.2 (s, CH), 125.0 (d,  $J_{\text{CP}} = 2.6$  Hz, CH), 127.2 (s, CH), 128.0 (s, CH), 128.2 (s,  $J_{\text{CP}} = 13.6$  Hz, CH), 128.3 (s, CH), 128.5 (s, CH), 129.1 (s, CH), 131.5 (s, CH), 131.8 (s, CH), 132.4 (s, C), 133.9 (s, CH), 134.2 (s, CH), 135.9 (d,  $J_{\text{CP}} = 13.9$  Hz, C), 136.1 (s, CH), 139.2 (d,  $J_{\text{CP}} = 12.9$  Hz, C),



140.1 (d,  $J_{CP} = 5.6$  Hz, C), 149.5 (s, CH), 152.6 (d,  $J_{CP} = 12.4$  Hz, C), 162.0 (d,  $J_{CP} = 13.7$  Hz, C). **HRMS** (ESI) m/z:  $[M+H]^+$  Calcd for  $C_{32}H_{32}NP_2S$  524.1725; Found 524.1727.

Raney nickel (~25 equiv) in a Schlenk tube was washed 3 times with EtOH, 3 times with THF<sup>3</sup>. A suspension of freshly prepared Raney nickel and **5** (0.2 mmol) in THF (5 mL) was stirred at room temperature until complete conversion observed by TLC analysis. The solution was filtered and the black solid was washed three times with THF and the crude product was quickly purified by column chromatography providing **6**. After desulfurisation was completed, the nickel waste was destroyed by addition of diluted HCl and subsequently concentrated HCl.

**6a**: white solid, m.p. 113.5-114.1 °C. ethyl acetate/petroleum ether = 1:20,  $R_f = 0.38$ , 78 mg, 79%.  $^{31}P\{^1H\}$  NMR ( $CDCl_3$ ; 121 MHz):  $\delta$  -9.9 (d,  $J_{PP} = 30.1$  Hz), -19.4 (d,  $J_{PP} = 31.2$  Hz).  $^1H$  NMR ( $CDCl_3$ ; 300 MHz):  $\delta$  0.88 (s, 3H,  $CH_3$ ), 1.44-1.50 (m, H,  $CH_2$ ), 1.76-1.83 (m, H,  $CH_2$ ), 2.00 (s, 3H,  $CH_3$ ), 2.13-2.20 (m, 1H, CH), 2.25-2.35 (m, 2H,  $CH_2$ ), 2.38-2.43 (m, 1H, CH), 6.89-6.93 (m, 2H, CH), 7.08-7.13 (m, 4H, CH), 7.16-7.26 (m, 10H, CH), 7.35-7.46 (m, 4H, CH).  $^{13}C\{^1H\}$  NMR ( $CDCl_3$ ; 75 MHz):  $\delta$  12.5 (s,  $CH_3$ ), 20.3 (s,  $CH_3$ ), 34.7 (dd,  $J_{CP} = 14.6$  Hz,  $J_{CP} = 6.3$  Hz,  $CH_2$ ), 44.8 (dd,  $J_{CP} = 4.5$  Hz,  $J_{CP} = 2.4$  Hz,  $CH_2$ ), 45.5 (dd,  $J_{CP} = 16.0$  Hz,  $J_{CP} = 9.7$  Hz, CH), 56.5 (dd,  $J_{CP} = 7.4$  Hz,  $J_{CP} = 3.6$  Hz, CH), 64.7 (d,  $J_{CP} = 5.3$  Hz, C), 126.2 (s, CH), 126.3 (s, CH), 128.1 (s, CH), 128.2 (d,  $J_{CP} = 19.7$  Hz, CH), 128.3 (s, CH), 128.5 (s, Ph, CH), 128.7 (dd,  $J_{CP} = 7.2$  Hz,  $J_{CP} = 1.3$  Hz, CH), 129.2 (s, CH), 132.0 (s, CH), 132.3 (s, CH), 133.2 (s, CH), 133.5 (s, CH), 138.3 (d,  $J_{CP} = 12.3$  Hz, C), 138.5 (d,  $J_{CP} = 12.3$  Hz, C), 139.5 (d,  $J_{CP} = 18.8$  Hz, C), 139.6 (d,  $J_{CP} = 19.7$  Hz, C), 140.0 (s, C), 155.5 (s, C). **HRMS** (ESI) m/z:  $[M+H]^+$  Calcd for  $C_{33}H_{33}P_2$  491.2052; Found 491.2051.

**6b**: white solid, m.p. 113.9-114.5 °C. ethyl acetate/petroleum ether = 1:10,  $R_f = 0.35$ , 82 mg, 83%.  $^{31}P\{^1H\}$  NMR ( $CDCl_3$ ; 121 MHz):  $\delta$  -20.98 (d,  $J_{PP} = 32.1$  Hz), -13.41 (d,  $J_{PP} = 31.7$  Hz).  $^1H$  NMR ( $CDCl_3$ ; 300 MHz):  $\delta$  0.90 (s, 3H,  $CH_3$ ), 1.46-1.52 (m, 1H,  $CH_2$ ), 1.76-1.84 (m, 1H,  $CH_2$ ), 2.10-2.23 (m, 1H,  $CH_2$ ), 2.17 (s, 3H,  $CH_3$ ), 2.27-2.29 (m, 1H,  $CH_2$ ), 2.33-2.42 (m, 2H, CH), 6.91-6.96 (m, 2H, CH), 7.08-7.13 (m, 5H, CH), 7.16-7.27 (m, 9H, CH), 7.52-7.54 (m, 1H, CH), 7.64-7.70 (m, 1H, CH),

8.64-8.65 (m, 1H, CH).  $^{13}\text{C}\{^1\text{H}\}$  NMR ( $\text{CDCl}_3$ ; 75 MHz):  $\delta$  12.8 (s,  $\text{CH}_3$ ), 20.1 (s,  $\text{CH}_3$ ), 34.5 (dd,  $J_{\text{CP}} = 14.0$  Hz,  $J_{\text{CP}} = 6.0$  Hz,  $\text{CH}_2$ ), 44.2 (dd,  $J_{\text{CP}} = 4.6$  Hz,  $J_{\text{CP}} = 2.3$  Hz,  $\text{CH}_2$ ), 45.3 (dd,  $J_{\text{CP}} = 16.1$  Hz,  $J_{\text{CP}} = 10.2$  Hz, CH), 56.5 (dd,  $J_{\text{CP}} = 7.5$  Hz,  $J_{\text{CP}} = 4.0$  Hz, CH), 65.1 (d,  $J_{\text{CP}} = 5.5$  Hz, C), 120.8 (s, CH), 123.6 (dd,  $J_{\text{CP}} = 7.7$  Hz,  $J_{\text{CP}} = 2.0$  Hz, CH), 126.4 (s, CH), 128.0 (s, CH), 128.1 (d,  $J_{\text{CP}} = 0.8$  Hz, CH), 128.2 (s, CH), 128.3 (d,  $J_{\text{CP}} = 6.1$  Hz, CH), 128.4 (s, CH), 129.3 (s, CH), 132.3 (d,  $J_{\text{CP}} = 17.5$  Hz, CH), 133.3 (d,  $J_{\text{CP}} = 19.1$  Hz, CH), 136.0 (s, CH), 138.6 (d,  $J_{\text{CP}} = 13.4$  Hz, C), 138.7 (d,  $J_{\text{CP}} = 13.4$  Hz, C), 139.5 (d,  $J_{\text{CP}} = 18.2$  Hz, C), 142.9 (s, C), 149.2 (s, CH), 158.4 (d,  $J_{\text{CP}} = 20.6$  Hz, C), 160.0 (d,  $J_{\text{CP}} = 1.8$  Hz, C). HRMS (ESI)  $m/z$ :  $[\text{M}+\text{H}]^+$  Calcd for  $\text{C}_{32}\text{H}_{32}\text{NP}_2$  492.2004; Found 492.2001.

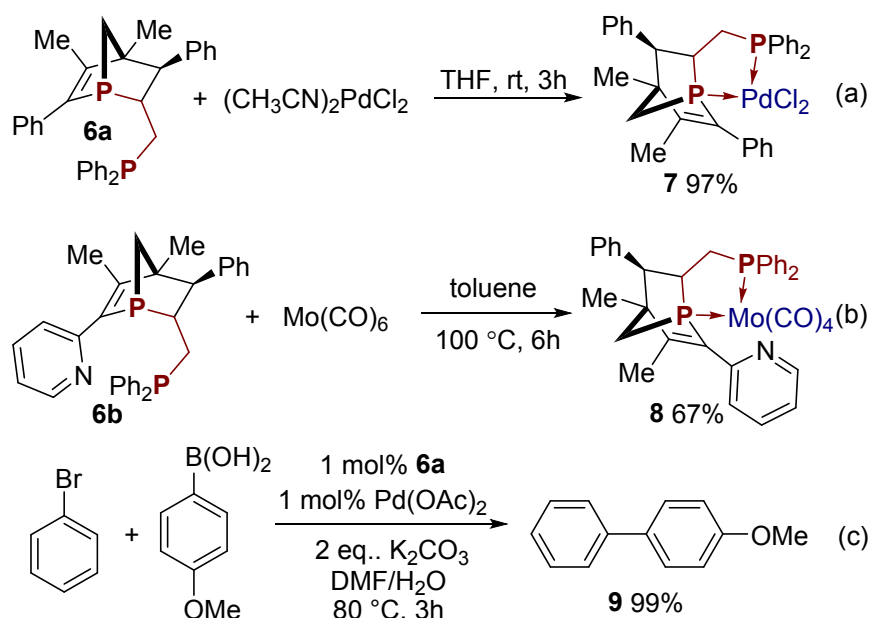

A 10 mL Schlenk tube containing a stirring bar was charged with **6a** (56 mg, 0.11 mmol),  $\text{Pd}(\text{CH}_3\text{CN})_2\text{Cl}_2$  (29 mg, 0.11 mmol), THF (3 mL) under nitrogen, sequentially. The resulting mixture was stirred at room temperature. After 3 h,  $^{31}\text{P}$  NMR spectroscopy showed the total conversion of **6a** into complex **7**. After evaporation of the solvent, complex **7** was washed with hexanes ( $3 \times 5$  mL), and then dried under vacuum and recovered as a yellow solid. Yield: 70 mg (97%).

**7**: yellow solid, m.p.  $> 250$  °C.  $^{31}\text{P}\{^1\text{H}\}$  NMR ( $(\text{CD}_3)_2\text{SO}$ ; 121 MHz):  $\delta$  -58.3 (d,  $J_{\text{PP}} = 11.7$  Hz), 85.7 (d,  $J_{\text{PP}} = 13.2$  Hz).  $^1\text{H}$  NMR ( $(\text{CD}_3)_2\text{SO}$ ; 300 MHz):  $\delta$  0.87 (s, 3H,  $\text{CH}_3$ ), 1.38-1.52 (m, 1H,  $\text{CH}_2$ ), 2.03 (s, 3H,  $\text{CH}_3$ ), 2.33-2.39 (m, 1H,  $\text{CH}_2$ ), 2.73-3.03 (m, 4H, CH,  $\text{CH}_2$ ), 6.79-6.86 (m, 2H, Ph), 7.02-7.16 (m, 2H, CH), 7.24-7.33 (m, 7H,

CH), 7.46-7.58 (m, 5H, CH), 7.71-7.73 (m, 2H, CH), 7.86-7.93 (m, 2H, CH).  $^{13}\text{C}\{^1\text{H}\}$  NMR (( $\text{CD}_3$ ) $_2\text{SO}$ ; 75 MHz):  $\delta$  13.5 (d,  $J_{\text{CP}} = 8.1$  Hz,  $\text{CH}_3$ ), 20.0 (d,  $J_{\text{CP}} = 13.2$  Hz,  $\text{CH}_3$ ), 30.2 (dd,  $J_{\text{CP}} = 34.1$  Hz,  $J_{\text{CP}} = 10.4$  Hz,  $\text{CH}_2$ ), 44.6 (d,  $J_{\text{CP}} = 37.4$  Hz,  $\text{CH}_2$ ), 48.3 (dd,  $J_{\text{CP}} = 27.5$  Hz,  $J_{\text{CP}} = 17.7$  Hz, CH), 51.5 (d,  $J_{\text{CP}} = 20.3$  Hz, CH), 64.5 (d,  $J_{\text{CP}} = 7.4$  Hz, C), 127.4 (s, C), 127.6 (s, CH), 128.1 (s, C), 128.3 (s, CH), 128.7 (d,  $J_{\text{CP}} = 11.2$  Hz, CH), 129.0 (s, CH), 129.2 (s, CH), 130.1 (s, C), 130.7 (d,  $J_{\text{CP}} = 4.6$  Hz, CH), 131.6 (s, CH), 132.3 (s, CH), 132.8 (s, CH), 133.0 (s, CH), 134.0 (s, CH), 134.2 (s, CH), 135.5 (d,  $J_{\text{CP}} = 13.1$  Hz, C), 140.6 (d,  $J_{\text{CP}} = 5.0$  Hz, C), 162.1 (d,  $J_{\text{CP}} = 8.5$  Hz, C). HRMS (ESI) m/z:  $[\text{M}+\text{Na}]^+$  Calcd for  $\text{C}_{33}\text{H}_{32}\text{Cl}_2\text{P}_2\text{PdNa}$  689.0283; Found 689.0282.

A 10 mL Schlenk tube containing a stirring bar was charged with **6b** (60 mg, 0.12 mmol),  $\text{Mo}(\text{CO})_6$  (31 mg, 0.12 mmol), toluene (2 mL) under nitrogen, sequentially. The resulting mixture was stirred at 100 °C. After 3 h,  $^{31}\text{P}$  NMR spectroscopy showed the total conversion of **6b** into complex **8**. The resulting solution was evaporated to dryness and the crude product was purified by column chromatography providing **8**. Yield: 56 mg (67%).

**8**: yellow solid, m.p. 139.4-140.2 °C, ethyl acetate/petroleum ether = 1:5,  $R_f = 0.25$ .  $^{31}\text{P}\{^1\text{H}\}$  NMR ( $\text{CDCl}_3$ ; 121 MHz):  $\delta$  53.67 (d,  $J_{\text{PP}} = 14.5$  Hz), 61.64 (d,  $J_{\text{PP}} = 14.5$  Hz).  $^1\text{H}$  NMR ( $\text{CDCl}_3$ ; 300 MHz):  $\delta$  0.98 (s, 3H,  $\text{CH}_3$ ), 1.84 (s, 3H,  $\text{CH}_3$ ), 1.96-2.00 (m, 1H,  $\text{CH}_2$ ), 2.11-2.17 (m, 1H,  $\text{CH}_2$ ), 2.31-2.43 (m, 1H,  $\text{CH}_2$ ), 2.49-2.55 (m, 2H, CH), 2.84-2.89 (m, 1H,  $\text{CH}_2$ ), 6.93-6.97 (m, 1H, CH), 7.12-7.15 (m, 1H, CH), 7.21-7.23 (m, 6H, CH), 7.30-7.39 (m, 8H, CH), 7.52-7.64 (m, 4H, CH).  $^{13}\text{C}\{^1\text{H}\}$  NMR ( $\text{CDCl}_3$ ; 75 MHz):  $\delta$  12.6 (d,  $J_{\text{CP}} = 5.0$  Hz,  $\text{CH}_3$ ), 19.9 (d,  $J_{\text{CP}} = 7.5$  Hz,  $\text{CH}_3$ ), 28.5 (dd,  $J_{\text{CP}} = 21.8$  Hz,  $J_{\text{CP}} = 10.7$  Hz,  $\text{CH}_2$ ), 46.4 (d,  $J_{\text{CP}} = 24.0$  Hz,  $\text{CH}_2$ ), 54.1 (d,  $J_{\text{CP}} = 17.7$  Hz, CH), 56.0 (dd,  $J_{\text{CP}} = 23.9$  Hz,  $J_{\text{CP}} = 20.5$  Hz, CH), 63.0 (s, C), 124.6 (s, CH), 127.2 (s, CH), 128.3 (s, CH), 128.4 (s, CH), 128.5 (s, CH), 128.9 (s, CH), 129.0 (s, CH), 130.4 (s, CH), 130.6 (s, CH), 132.5 (s, CH), 132.6 (s, CH), 136.1 (s, CH), 136.7 (d,  $J_{\text{CP}} = 19.1$  Hz, C), 137.3 (d,  $J_{\text{CP}} = 32.8$  Hz, C), 138.8 (d,  $J_{\text{CP}} = 29.7$  Hz, C), 141.1 (d,  $J_{\text{CP}} = 3.8$  Hz, C), 148.9 (s, CH), 155.6 (d,  $J_{\text{CP}} = 14.0$  Hz, C), 160.2 (s, C), 208.5 (t,  $J_{\text{CP}} = 8.2$  Hz, CO); 209.4 (t,  $J_{\text{CP}} = 8.7$  Hz, CO) 217.1 (dd,  $J_{\text{CP}} = 28.0$  Hz,  $J_{\text{CP}} = 8.6$  Hz,

CO), 217.8 (dd,  $J_{\text{CP}} = 25.8$  Hz,  $J_{\text{CP}} = 8.8$  Hz, CO). **HRMS** (ESI) m/z:  $[\text{M}+\text{H}]^+$  Calcd for  $\text{C}_{36}\text{H}_{32}\text{MoNO}_4\text{P}_2$  702.0855; Found 702.0852.

A mixture of bromobenzene (1 mmol, 105  $\mu\text{L}$ ), 4-Methoxyphenylboronic acid (1 mmol, 182 mg),  $\text{Pd}(\text{OAc})_2$  (0.01 mmol, 2.24 mg), 6a (0.01 mmol, 4.9 mg),  $\text{K}_2\text{CO}_3$  (2 mmol, 276 mg), distilled water (2.5 mL) and DMF (2.5 mL) was stirred at 80 °C in oil bath for 3 h under nitrogen. Ethyl acetate (10 mL) was then added to the reaction solution. The solution were washed 3 times with water. The organic phase was dried with  $\text{MgSO}_4$ . After filtration, the solution was evaporated to dryness. The crude product was purified by column chromatography providing **9**.

**9**<sup>4</sup>: white solid. dichloromethane/petroleum ether = 1:8,  $R_f = 0.35$ . 183 mg, 99%. **<sup>1</sup>H NMR** ( $\text{CDCl}_3$ ; 300 MHz):  $\delta$  3.82 (s, 3H,  $\text{OCH}_3$ ), 6.96 (d,  $J_{\text{CP}} = 8.7$  Hz, 2H), 7.28 (t,  $J_{\text{CP}} = 7.3$  Hz, 1H), 7.40 (t,  $J_{\text{CP}} = 7.3$  Hz, 2H), 7.50-7.55 (m, 4H). **<sup>13</sup>C{<sup>1</sup>H} NMR** ( $\text{CDCl}_3$ ; 75 MHz):  $\delta$  55.4 (s,  $\text{OCH}_3$ ), 114.2 (s, CH), 126.7 (s, CH), 126.8 (s, CH), 128.2 (s, CH), 128.8 (s, CH), 133.8 (s, C), 140.9 (s, C), 159.2 (s, C).

#### References:

1. (a) A. Breque, P. Savignac, F. Mathey, An Improved One-Pot Synthesis of Phospholes. *Synthesis*, 1981, 983; (b) S. Holand, M. Jeanjean and F. Mathey, A Straightforward Access to  $\alpha$ -Functional Phospholide Ions. *Angew. Chem. Int. Ed. Engl.*, 1997, **36**, 98; (c) P. Wonneberger, N. König, F. B. Kraft, M. B. Sárosi and E. Hey-Hawkins, Access to 1-Phospha-2-azanorbornenes by Phospha-aza-Diels–Alder Reactions. *Angew. Chem. Int. Ed.*, 2019, **58**, 3208.

2. (a) Z. S. Zhao, L. Racicot, and G. K. Murphy, Fluorinative Rearrangements of Substituted Phenylallenes Mediated by (Difluoroiodo)toluene: Synthesis of  $\alpha$ -(Difluoromethyl)styrenes. *Angew. Chem. Int. Ed.*, 2017, **56**, 11620; (b) S. Li, Z. Tang, Y. Wang, D. Wang, Z. Wang, C. Yu, T. Li, D. Wei and C. Yao, NHC-Catalyzed Aldol-Like Reactions of Allenates with Isatins: Regiospecific Syntheses of  $\gamma$ -Functionalized Allenates. *Org. Lett.*, 2019, **21**, 1306.

3. T. Möller, P. Wonneberger, M. B. Sárosi, P. Coburger and E. Hey-Hawkins, P-chiral 1-phosphanorbornenes: from asymmetric phospha-Diels–Alder reactions towards ligand design and functionalization. *Dalton Trans.*, 2016, **45**, 1904.

4. A. Sen, R. N. Dhital, T. Sato, A. Ohno, Y. M. A. Yamada, Switching from Biaryl Formation to Amidation with Convuluted Polymeric Nickel Catalysis. *ACS Catal.*, 2020, **10**, 14410.

## X-ray crystallographic studies of compound 4a

### Crystal Structure of Compound *exo*-4a

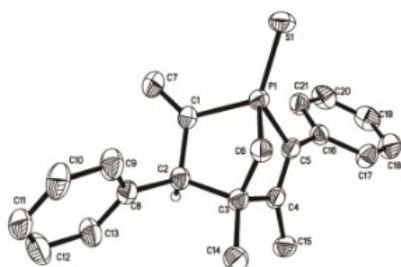

**Table 1 Crystal data and structure refinement for *exo*-4a.**

|                                      |                                                               |
|--------------------------------------|---------------------------------------------------------------|
| Identification code                  | <i>exo</i> -4a                                                |
| Empirical formula                    | C <sub>21</sub> H <sub>21</sub> PS                            |
| Formula weight                       | 336.41                                                        |
| Temperature/K                        | 293(2)                                                        |
| Crystal system                       | orthorhombic                                                  |
| Space group                          | P2 <sub>1</sub> 2 <sub>1</sub> 2 <sub>1</sub>                 |
| a/Å                                  | 8.5968(3)                                                     |
| b/Å                                  | 10.8680(5)                                                    |
| c/Å                                  | 19.5365(7)                                                    |
| α/°                                  | 90                                                            |
| β/°                                  | 90                                                            |
| γ/°                                  | 90                                                            |
| Volume/Å <sup>3</sup>                | 1825.30(13)                                                   |
| Z                                    | 4                                                             |
| ρ <sub>calc</sub> /g/cm <sup>3</sup> | 1.224                                                         |
| μ/mm <sup>-1</sup>                   | 2.356                                                         |
| F(000)                               | 712.0                                                         |
| Crystal size/mm <sup>3</sup>         | 0.15 × 0.12 × 0.09                                            |
| Radiation                            | CuKα (λ = 1.54184)                                            |
| 2θ range for data collection/°       | 9.054 to 141.77                                               |
| Index ranges                         | -10 ≤ h ≤ 10, -13 ≤ k ≤ 13, -13 ≤ l ≤ 23                      |
| Reflections collected                | 7505                                                          |
| Independent reflections              | 3456 [R <sub>int</sub> = 0.0323, R <sub>sigma</sub> = 0.0405] |
| Data/restraints/parameters           | 3456/0/210                                                    |
| Goodness-of-fit on F <sup>2</sup>    | 1.024                                                         |

|                                                |                                  |
|------------------------------------------------|----------------------------------|
| Final R indexes [ $I \geq 2\sigma(I)$ ]        | $R_1 = 0.0434$ , $wR_2 = 0.1104$ |
| Final R indexes [all data]                     | $R_1 = 0.0500$ , $wR_2 = 0.1165$ |
| Largest diff. peak/hole / $e \text{ \AA}^{-3}$ | 0.29/-0.25                       |
| Flack parameter                                | -0.018(15)                       |

**Table 2 Bond Lengths for *exo-4a*.**

| Atom | Atom | Length/ $\text{\AA}$ | Atom | Atom | Length/ $\text{\AA}$ |
|------|------|----------------------|------|------|----------------------|
| S1   | P1   | 1.9378(14)           | C5   | C16  | 1.469(5)             |
| P1   | C1   | 1.827(3)             | C8   | C9   | 1.386(6)             |
| P1   | C5   | 1.823(4)             | C8   | C13  | 1.369(6)             |
| P1   | C6   | 1.816(4)             | C9   | C10  | 1.382(6)             |
| C1   | C2   | 1.527(5)             | C10  | C11  | 1.351(8)             |
| C1   | C7   | 1.295(6)             | C11  | C12  | 1.365(8)             |
| C2   | C3   | 1.593(5)             | C12  | C13  | 1.390(6)             |
| C2   | C8   | 1.520(5)             | C16  | C17  | 1.389(6)             |
| C3   | C4   | 1.541(5)             | C16  | C21  | 1.379(6)             |
| C3   | C6   | 1.545(5)             | C17  | C18  | 1.387(6)             |
| C3   | C14  | 1.514(5)             | C18  | C19  | 1.361(7)             |
| C4   | C5   | 1.336(5)             | C19  | C20  | 1.376(8)             |
| C4   | C15  | 1.497(6)             | C20  | C21  | 1.395(6)             |

**Table 3 Bond Angles for *exo-4a*.**

| Atom | Atom | Atom | Angle/ $^\circ$ | Atom | Atom | Atom | Angle/ $^\circ$ |
|------|------|------|-----------------|------|------|------|-----------------|
| C1   | P1   | S1   | 120.14(14)      | C4   | C5   | P1   | 105.8(3)        |
| C5   | P1   | S1   | 121.54(13)      | C4   | C5   | C16  | 128.1(3)        |
| C5   | P1   | C1   | 98.89(17)       | C16  | C5   | P1   | 125.8(3)        |
| C6   | P1   | S1   | 125.99(14)      | C3   | C6   | P1   | 94.9(2)         |
| C6   | P1   | C1   | 91.25(17)       | C9   | C8   | C2   | 122.8(4)        |
| C6   | P1   | C5   | 91.29(18)       | C13  | C8   | C2   | 119.8(4)        |
| C2   | C1   | P1   | 106.4(2)        | C13  | C8   | C9   | 117.4(4)        |
| C7   | C1   | P1   | 125.0(4)        | C10  | C9   | C8   | 120.9(5)        |
| C7   | C1   | C2   | 128.6(4)        | C11  | C10  | C9   | 121.2(5)        |
| C1   | C2   | C3   | 105.6(3)        | C10  | C11  | C12  | 118.7(4)        |
| C8   | C2   | C1   | 113.8(3)        | C11  | C12  | C13  | 120.8(5)        |
| C8   | C2   | C3   | 115.1(3)        | C8   | C13  | C12  | 120.9(5)        |
| C4   | C3   | C2   | 104.9(3)        | C17  | C16  | C5   | 119.5(3)        |
| C4   | C3   | C6   | 103.9(3)        | C21  | C16  | C5   | 122.4(3)        |
| C6   | C3   | C2   | 105.4(3)        | C21  | C16  | C17  | 118.1(4)        |
| C14  | C3   | C2   | 113.7(3)        | C18  | C17  | C16  | 120.9(4)        |
| C14  | C3   | C4   | 114.4(3)        | C19  | C18  | C17  | 120.5(5)        |

|     |    |     |          |     |     |     |          |
|-----|----|-----|----------|-----|-----|-----|----------|
| C14 | C3 | C6  | 113.4(3) | C18 | C19 | C20 | 119.6(4) |
| C5  | C4 | C3  | 114.0(3) | C19 | C20 | C21 | 120.1(5) |
| C5  | C4 | C15 | 125.5(3) | C16 | C21 | C20 | 120.7(4) |
| C15 | C4 | C3  | 120.1(3) |     |     |     |          |

**Table 4 Torsion Angles for *exo-4a*.**

| <b>A</b> | <b>B</b> | <b>C</b> | <b>D</b> | <b>Angle/°</b> | <b>A</b> | <b>B</b> | <b>C</b> | <b>D</b> | <b>Angle/°</b> |
|----------|----------|----------|----------|----------------|----------|----------|----------|----------|----------------|
| S1       | P1       | C1       | C2       | -166.18(19)    | C5       | P1       | C6       | C3       | -47.1(2)       |
| S1       | P1       | C1       | C7       | 13.5(5)        | C5       | C16      | C17      | C18      | 176.3(4)       |
| S1       | P1       | C5       | C4       | 165.7(2)       | C5       | C16      | C21      | C20      | -174.9(4)      |
| S1       | P1       | C5       | C16      | -20.6(4)       | C6       | P1       | C1       | C2       | -32.4(3)       |
| S1       | P1       | C6       | C3       | -178.66(15)    | C6       | P1       | C1       | C7       | 147.3(4)       |
| P1       | C1       | C2       | C3       | 1.2(3)         | C6       | P1       | C5       | C4       | 31.0(3)        |
| P1       | C1       | C2       | C8       | 128.4(3)       | C6       | P1       | C5       | C16      | -155.3(3)      |
| P1       | C5       | C16      | C17      | 130.4(4)       | C6       | C3       | C4       | C5       | -34.9(4)       |
| P1       | C5       | C16      | C21      | -52.1(5)       | C6       | C3       | C4       | C15      | 152.2(4)       |
| C1       | P1       | C5       | C4       | -60.5(3)       | C7       | C1       | C2       | C3       | -178.4(5)      |
| C1       | P1       | C5       | C16      | 113.2(3)       | C7       | C1       | C2       | C8       | -51.2(6)       |
| C1       | P1       | C6       | C3       | 51.8(2)        | C8       | C2       | C3       | C4       | 162.6(3)       |
| C1       | C2       | C3       | C4       | -71.0(3)       | C8       | C2       | C3       | C6       | -88.0(4)       |
| C1       | C2       | C3       | C6       | 38.4(4)        | C8       | C2       | C3       | C14      | 36.8(5)        |
| C1       | C2       | C3       | C14      | 163.3(3)       | C8       | C9       | C10      | C11      | -3.3(9)        |
| C1       | C2       | C8       | C9       | -50.9(5)       | C9       | C8       | C13      | C12      | -0.9(8)        |
| C1       | C2       | C8       | C13      | 129.3(4)       | C9       | C10      | C11      | C12      | 1.4(9)         |
| C2       | C3       | C4       | C5       | 75.5(4)        | C10      | C11      | C12      | C13      | 0.7(10)        |
| C2       | C3       | C4       | C15      | -97.4(4)       | C11      | C12      | C13      | C8       | -0.9(10)       |
| C2       | C3       | C6       | P1       | -58.6(3)       | C13      | C8       | C9       | C10      | 2.9(7)         |
| C2       | C8       | C9       | C10      | -176.9(5)      | C14      | C3       | C4       | C5       | -159.2(4)      |
| C2       | C8       | C13      | C12      | 178.9(5)       | C14      | C3       | C4       | C15      | 27.9(5)        |
| C3       | C2       | C8       | C9       | 71.2(5)        | C14      | C3       | C6       | P1       | 176.3(3)       |
| C3       | C2       | C8       | C13      | -108.6(4)      | C15      | C4       | C5       | P1       | 170.5(3)       |
| C3       | C4       | C5       | P1       | -1.9(4)        | C15      | C4       | C5       | C16      | -3.0(6)        |
| C3       | C4       | C5       | C16      | -175.4(3)      | C16      | C17      | C18      | C19      | -1.3(8)        |
| C4       | C3       | C6       | P1       | 51.5(3)        | C17      | C16      | C21      | C20      | 2.7(7)         |
| C4       | C5       | C16      | C17      | -57.4(6)       | C17      | C18      | C19      | C20      | 2.5(8)         |
| C4       | C5       | C16      | C21      | 120.1(5)       | C18      | C19      | C20      | C21      | -1.1(8)        |
| C5       | P1       | C1       | C2       | 59.1(3)        | C19      | C20      | C21      | C16      | -1.5(8)        |
| C5       | P1       | C1       | C7       | -121.2(4)      | C21      | C16      | C17      | C18      | -1.3(7)        |

## X-ray crystallographic studies of compound 6b

### Crystal Structure of Compound 6b

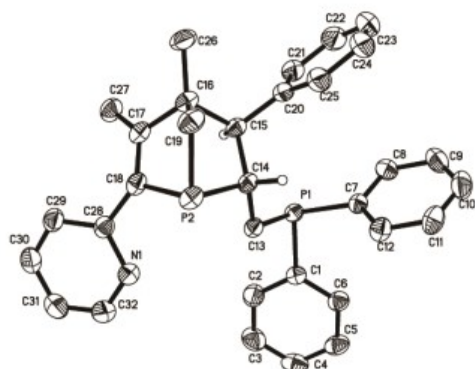

**Table 5** Crystal data and structure refinement for **6b**

|                                      |                                                               |
|--------------------------------------|---------------------------------------------------------------|
| Identification code                  | 202008152                                                     |
| Empirical formula                    | C <sub>32</sub> H <sub>31</sub> NP <sub>2</sub>               |
| Formula weight                       | 491.52                                                        |
| Temperature/K                        | 293(2)                                                        |
| Crystal system                       | monoclinic                                                    |
| Space group                          | P2 <sub>1</sub> /n                                            |
| a/Å                                  | 11.9742(2)                                                    |
| b/Å                                  | 10.3221(2)                                                    |
| c/Å                                  | 21.5772(4)                                                    |
| α/°                                  | 90                                                            |
| β/°                                  | 97.4710(19)                                                   |
| γ/°                                  | 90                                                            |
| Volume/Å <sup>3</sup>                | 2644.31(9)                                                    |
| Z                                    | 4                                                             |
| ρ <sub>calc</sub> /g/cm <sup>3</sup> | 1.235                                                         |
| μ/mm <sup>-1</sup>                   | 1.638                                                         |
| F(000)                               | 1040.0                                                        |
| Crystal size/mm <sup>3</sup>         | 0.16 × 0.12 × 0.1                                             |
| Radiation                            | CuKα (λ = 1.54184)                                            |
| 2θ range for data collection/°       | 8.034 to 134.136                                              |
| Index ranges                         | -14 ≤ h ≤ 12, -7 ≤ k ≤ 12, -23 ≤ l ≤ 25                       |
| Reflections collected                | 9907                                                          |
| Independent reflections              | 4727 [R <sub>int</sub> = 0.0319, R <sub>sigma</sub> = 0.0441] |
| Data/restraints/parameters           | 4727/0/318                                                    |
| Goodness-of-fit on F <sup>2</sup>    | 1.040                                                         |
| Final R indexes [I ≥ 2σ (I)]         | R <sub>1</sub> = 0.0447, wR <sub>2</sub> = 0.1095             |
| Final R indexes [all data]           | R <sub>1</sub> = 0.0620, wR <sub>2</sub> = 0.1238             |



Largest diff. peak/hole / e Å<sup>-3</sup>

0.32/-0.18

**Table 6 Bond Lengths for 6a.**

| Atom | Atom | Length/Å | Atom | Atom | Length/Å |
|------|------|----------|------|------|----------|
| C1   | C2   | 1.386(4) | C16  | C17  | 1.527(3) |
| C1   | C6   | 1.382(3) | C16  | C19  | 1.537(3) |
| C1   | P1   | 1.843(2) | C16  | C26  | 1.528(3) |
| C2   | C3   | 1.384(4) | C17  | C18  | 1.358(3) |
| C3   | C4   | 1.368(4) | C17  | C27  | 1.497(3) |
| C4   | C5   | 1.369(4) | C18  | C28  | 1.464(3) |
| C5   | C6   | 1.385(4) | C18  | P2   | 1.848(2) |
| C7   | C8   | 1.391(3) | C19  | P2   | 1.848(3) |
| C7   | C12  | 1.388(3) | C20  | C21  | 1.378(4) |
| C7   | P1   | 1.835(2) | C20  | C25  | 1.388(4) |
| C8   | C9   | 1.392(4) | C21  | C22  | 1.387(4) |
| C9   | C10  | 1.374(5) | C22  | C23  | 1.371(5) |
| C10  | C11  | 1.368(4) | C23  | C24  | 1.363(5) |
| C11  | C12  | 1.378(4) | C24  | C25  | 1.381(4) |
| C13  | C14  | 1.527(3) | C28  | C29  | 1.396(3) |
| C13  | P1   | 1.861(2) | C28  | N1   | 1.345(3) |
| C14  | C15  | 1.559(3) | C29  | C30  | 1.374(4) |
| C14  | P2   | 1.890(2) | C30  | C31  | 1.370(4) |
| C15  | C16  | 1.594(3) | C31  | C32  | 1.367(4) |
| C15  | C20  | 1.511(3) | C32  | N1   | 1.334(4) |

**Table 7 Bond Angles for 6a**

| Atom | Atom | Atom | Angle/°    | Atom | Atom | Atom | Angle/°    |
|------|------|------|------------|------|------|------|------------|
| C2   | C1   | P1   | 118.36(19) | C18  | C17  | C16  | 111.9(2)   |
| C6   | C1   | C2   | 117.7(2)   | C18  | C17  | C27  | 127.8(2)   |
| C6   | C1   | P1   | 123.88(19) | C27  | C17  | C16  | 119.6(2)   |
| C3   | C2   | C1   | 121.1(3)   | C17  | C18  | C28  | 128.2(2)   |
| C4   | C3   | C2   | 120.5(3)   | C17  | C18  | P2   | 110.18(19) |
| C3   | C4   | C5   | 119.2(3)   | C28  | C18  | P2   | 120.90(17) |
| C4   | C5   | C6   | 120.7(3)   | C16  | C19  | P2   | 99.13(15)  |
| C1   | C6   | C5   | 120.9(3)   | C21  | C20  | C15  | 120.0(2)   |
| C8   | C7   | P1   | 116.68(18) | C21  | C20  | C25  | 117.5(3)   |
| C12  | C7   | C8   | 118.9(2)   | C25  | C20  | C15  | 122.5(2)   |
| C12  | C7   | P1   | 124.44(19) | C20  | C21  | C22  | 121.1(3)   |
| C7   | C8   | C9   | 119.7(3)   | C23  | C22  | C21  | 120.2(3)   |

|     |     |     |            |     |     |     |            |
|-----|-----|-----|------------|-----|-----|-----|------------|
| C10 | C9  | C8  | 120.5(3)   | C24 | C23 | C22 | 119.8(3)   |
| C11 | C10 | C9  | 119.8(3)   | C23 | C24 | C25 | 120.0(3)   |
| C10 | C11 | C12 | 120.5(3)   | C24 | C25 | C20 | 121.5(3)   |
| C11 | C12 | C7  | 120.6(3)   | C29 | C28 | C18 | 123.9(2)   |
| C14 | C13 | P1  | 115.90(16) | N1  | C28 | C18 | 114.6(2)   |
| C13 | C14 | C15 | 116.25(18) | N1  | C28 | C29 | 121.4(2)   |
| C13 | C14 | P2  | 111.74(15) | C30 | C29 | C28 | 119.0(3)   |
| C15 | C14 | P2  | 106.91(14) | C31 | C30 | C29 | 119.7(3)   |
| C14 | C15 | C16 | 106.50(18) | C32 | C31 | C30 | 117.6(3)   |
| C20 | C15 | C14 | 114.03(18) | N1  | C32 | C31 | 124.8(3)   |
| C20 | C15 | C16 | 114.17(19) | C32 | N1  | C28 | 117.3(2)   |
| C17 | C16 | C15 | 103.06(18) | C1  | P1  | C13 | 97.19(10)  |
| C17 | C16 | C19 | 104.1(2)   | C7  | P1  | C1  | 103.02(10) |
| C17 | C16 | C26 | 115.2(2)   | C7  | P1  | C13 | 104.36(10) |
| C19 | C16 | C15 | 105.47(19) | C18 | P2  | C14 | 95.76(10)  |
| C26 | C16 | C15 | 113.9(2)   | C18 | P2  | C19 | 87.72(12)  |
| C26 | C16 | C19 | 113.9(2)   | C19 | P2  | C14 | 87.28(11)  |

**Table 8 Torsion Angles for 6a.**

| A   | B   | C   | D   | Angle/°     | A   | B   | C   | D   | Angle/°    |
|-----|-----|-----|-----|-------------|-----|-----|-----|-----|------------|
| C1  | C2  | C3  | C4  | -1.2(5)     | C16 | C19 | P2  | C18 | -43.49(17) |
| C2  | C1  | C6  | C5  | -1.3(4)     | C17 | C16 | C19 | P2  | 51.20(19)  |
| C2  | C1  | P1  | C7  | 171.3(2)    | C17 | C18 | C28 | C29 | -39.0(4)   |
| C2  | C1  | P1  | C13 | 64.7(2)     | C17 | C18 | C28 | N1  | 139.7(3)   |
| C2  | C3  | C4  | C5  | -0.1(5)     | C17 | C18 | P2  | C14 | -60.89(18) |
| C3  | C4  | C5  | C6  | 0.7(5)      | C17 | C18 | P2  | C19 | 26.14(19)  |
| C4  | C5  | C6  | C1  | 0.0(4)      | C18 | C28 | C29 | C30 | 173.8(2)   |
| C6  | C1  | C2  | C3  | 1.9(4)      | C18 | C28 | N1  | C32 | -174.7(2)  |
| C6  | C1  | P1  | C7  | -12.3(2)    | C19 | C16 | C17 | C18 | -35.7(3)   |
| C6  | C1  | P1  | C13 | -118.9(2)   | C19 | C16 | C17 | C27 | 153.7(2)   |
| C7  | C8  | C9  | C10 | -0.2(4)     | C20 | C15 | C16 | C17 | 156.4(2)   |
| C8  | C7  | C12 | C11 | -0.8(4)     | C20 | C15 | C16 | C19 | -94.7(2)   |
| C8  | C7  | P1  | C1  | 111.59(19)  | C20 | C15 | C16 | C26 | 30.9(3)    |
| C8  | C7  | P1  | C13 | -147.35(18) | C20 | C21 | C22 | C23 | -1.2(5)    |
| C8  | C9  | C10 | C11 | -0.8(5)     | C21 | C20 | C25 | C24 | 1.5(4)     |
| C9  | C10 | C11 | C12 | 0.9(5)      | C21 | C22 | C23 | C24 | 2.5(6)     |
| C10 | C11 | C12 | C7  | -0.1(4)     | C22 | C23 | C24 | C25 | -1.8(6)    |
| C12 | C7  | C8  | C9  | 1.0(4)      | C23 | C24 | C25 | C20 | -0.3(5)    |
| C12 | C7  | P1  | C1  | -68.8(2)    | C25 | C20 | C21 | C22 | -0.8(4)    |

|     |     |     |     |             |     |     |     |     |            |
|-----|-----|-----|-----|-------------|-----|-----|-----|-----|------------|
| C12 | C7  | P1  | C13 | 32.3(2)     | C26 | C16 | C17 | C18 | -161.2(2)  |
| C13 | C14 | C15 | C16 | 132.6(2)    | C26 | C16 | C17 | C27 | 28.3(3)    |
| C13 | C14 | C15 | C20 | -100.6(2)   | C26 | C16 | C19 | P2  | 177.47(19) |
| C13 | C14 | P2  | C18 | -75.74(17)  | C27 | C17 | C18 | C28 | 1.1(4)     |
| C13 | C14 | P2  | C19 | -163.17(17) | C27 | C17 | C18 | P2  | 171.1(2)   |
| C14 | C13 | P1  | C1  | 169.46(17)  | C28 | C18 | P2  | C14 | 109.93(19) |
| C14 | C13 | P1  | C7  | 63.99(18)   | C28 | C18 | P2  | C19 | -163.0(2)  |
| C14 | C15 | C16 | C17 | -76.9(2)    | C28 | C29 | C30 | C31 | 2.3(4)     |
| C14 | C15 | C16 | C19 | 32.0(2)     | C29 | C28 | N1  | C32 | 4.0(4)     |
| C14 | C15 | C16 | C26 | 157.6(2)    | C29 | C30 | C31 | C32 | 0.9(4)     |
| C14 | C15 | C20 | C21 | 130.6(2)    | C30 | C31 | C32 | N1  | -1.8(5)    |
| C14 | C15 | C20 | C25 | -50.2(3)    | C31 | C32 | N1  | C28 | -0.6(5)    |
| C15 | C14 | P2  | C18 | 52.50(16)   | N1  | C28 | C29 | C30 | -4.9(4)    |
| C15 | C14 | P2  | C19 | -34.93(16)  | P1  | C1  | C2  | C3  | 178.5(2)   |
| C15 | C16 | C17 | C18 | 74.2(2)     | P1  | C1  | C6  | C5  | -177.7(2)  |
| C15 | C16 | C17 | C27 | -96.4(2)    | P1  | C7  | C8  | C9  | -179.4(2)  |
| C15 | C16 | C19 | P2  | -56.9(2)    | P1  | C7  | C12 | C11 | 179.5(2)   |
| C15 | C20 | C21 | C22 | 178.5(2)    | P1  | C13 | C14 | C15 | 47.0(2)    |
| C15 | C20 | C25 | C24 | -177.7(3)   | P1  | C13 | C14 | P2  | 170.07(11) |
| C16 | C15 | C20 | C21 | -106.7(3)   | P2  | C14 | C15 | C16 | 7.0(2)     |
| C16 | C15 | C20 | C25 | 72.5(3)     | P2  | C14 | C15 | C20 | 133.84(17) |
| C16 | C17 | C18 | C28 | -168.5(2)   | P2  | C18 | C28 | C29 | 152.0(2)   |
| C16 | C17 | C18 | P2  | 1.4(2)      | P2  | C18 | C28 | N1  | -29.3(3)   |
| C16 | C19 | P2  | C14 | 52.39(17)   |     |     |     |     |            |

## X-ray crystallographic studies of compound 7

### Crystal Structure of Compound 7

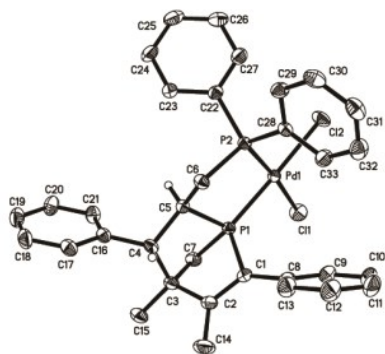

**Table 9 Crystal data and structure refinement for 7.**

|                                               |                                                               |
|-----------------------------------------------|---------------------------------------------------------------|
| Identification code                           | 202008137                                                     |
| Empirical formula                             | $C_{33}H_{32}Cl_2P_2Pd$                                       |
| Formula weight                                | 667.82                                                        |
| Temperature/K                                 | 293(2)                                                        |
| Crystal system                                | monoclinic                                                    |
| Space group                                   | $P2_1/n$                                                      |
| $a/\text{\AA}$                                | 11.55252(15)                                                  |
| $b/\text{\AA}$                                | 13.96012(19)                                                  |
| $c/\text{\AA}$                                | 18.4085(2)                                                    |
| $\alpha/^\circ$                               | 90                                                            |
| $\beta/^\circ$                                | 94.0277(11)                                                   |
| $\gamma/^\circ$                               | 90                                                            |
| Volume/ $\text{\AA}^3$                        | 2961.49(6)                                                    |
| Z                                             | 4                                                             |
| $\rho_{\text{calc}}/\text{g/cm}^3$            | 1.498                                                         |
| $\mu/\text{mm}^{-1}$                          | 7.892                                                         |
| F(000)                                        | 1360.0                                                        |
| Crystal size/ $\text{mm}^3$                   | $0.11 \times 0.1 \times 0.08$                                 |
| Radiation                                     | $\text{CuK}\alpha$ ( $\lambda = 1.54184$ )                    |
| $2\theta$ range for data collection/ $^\circ$ | 7.956 to 134.14                                               |
| Index ranges                                  | $-13 \leq h \leq 13, -16 \leq k \leq 16, -21 \leq l \leq 14$  |
| Reflections collected                         | 11646                                                         |
| Independent reflections                       | 5279 [ $R_{\text{int}} = 0.0495, R_{\text{sigma}} = 0.0555$ ] |
| Data/restraints/parameters                    | 5279/0/345                                                    |
| Goodness-of-fit on $F^2$                      | 1.058                                                         |
| Final R indexes [ $I \geq 2\sigma(I)$ ]       | $R_1 = 0.0502, wR_2 = 0.1284$                                 |
| Final R indexes [all data]                    | $R_1 = 0.0564, wR_2 = 0.1359$                                 |
| Largest diff. peak/hole / $e \text{\AA}^{-3}$ | 1.28/-1.17                                                    |

**Table 10 Bond Lengths for 7.**

| Atom | Atom | Length/Å | Atom | Atom | Length/Å   |
|------|------|----------|------|------|------------|
| C1   | C2   | 1.353(6) | C17  | C18  | 1.378(7)   |
| C1   | C8   | 1.483(6) | C18  | C19  | 1.373(8)   |
| C1   | P1   | 1.813(4) | C19  | C20  | 1.394(8)   |
| C2   | C3   | 1.530(6) | C20  | C21  | 1.388(7)   |
| C2   | C14  | 1.499(7) | C22  | C23  | 1.392(6)   |
| C3   | C4   | 1.608(6) | C22  | C27  | 1.382(7)   |
| C3   | C7   | 1.554(6) | C22  | P2   | 1.819(4)   |
| C3   | C15  | 1.523(6) | C23  | C24  | 1.372(8)   |
| C4   | C5   | 1.549(5) | C24  | C25  | 1.376(9)   |
| C4   | C16  | 1.517(6) | C25  | C26  | 1.378(9)   |
| C5   | C6   | 1.523(5) | C26  | C27  | 1.383(7)   |
| C5   | P1   | 1.836(4) | C28  | C29  | 1.381(6)   |
| C6   | P2   | 1.854(4) | C28  | C33  | 1.383(6)   |
| C7   | P1   | 1.814(5) | C28  | P2   | 1.811(4)   |
| C8   | C9   | 1.380(7) | C29  | C30  | 1.404(7)   |
| C8   | C13  | 1.393(7) | C30  | C31  | 1.371(8)   |
| C9   | C10  | 1.386(8) | C31  | C32  | 1.377(8)   |
| C10  | C11  | 1.371(9) | C32  | C33  | 1.384(7)   |
| C11  | C12  | 1.357(9) | C11  | Pd1  | 2.3534(11) |
| C12  | C13  | 1.399(8) | C12  | Pd1  | 2.3477(11) |
| C16  | C17  | 1.390(6) | P1   | Pd1  | 2.1996(10) |
| C16  | C21  | 1.381(6) | P2   | Pd1  | 2.2622(10) |

**Table 11 Bond Angles for 7**

| Atom | Atom | Atom | Angle/°  | Atom | Atom | Atom | Angle/°  |
|------|------|------|----------|------|------|------|----------|
| C2   | C1   | C8   | 128.9(4) | C16  | C21  | C20  | 122.0(5) |
| C2   | C1   | P1   | 106.1(3) | C23  | C22  | P2   | 121.6(4) |
| C8   | C1   | P1   | 124.3(3) | C27  | C22  | C23  | 118.4(4) |
| C1   | C2   | C3   | 113.0(4) | C27  | C22  | P2   | 120.0(3) |
| C1   | C2   | C14  | 125.8(4) | C24  | C23  | C22  | 120.5(5) |
| C14  | C2   | C3   | 120.8(4) | C23  | C24  | C25  | 120.7(5) |
| C2   | C3   | C4   | 103.2(3) | C24  | C25  | C26  | 119.5(5) |
| C2   | C3   | C7   | 104.2(4) | C25  | C26  | C27  | 119.9(5) |

|     |     |     |          |     |     |     |            |
|-----|-----|-----|----------|-----|-----|-----|------------|
| C7  | C3  | C4  | 107.1(3) | C22 | C27 | C26 | 121.0(5)   |
| C15 | C3  | C2  | 115.0(4) | C29 | C28 | C33 | 119.8(4)   |
| C15 | C3  | C4  | 114.2(4) | C29 | C28 | P2  | 121.8(3)   |
| C15 | C3  | C7  | 112.2(4) | C33 | C28 | P2  | 118.4(3)   |
| C5  | C4  | C3  | 105.4(3) | C28 | C29 | C30 | 120.2(4)   |
| C16 | C4  | C3  | 114.3(3) | C31 | C30 | C29 | 119.4(5)   |
| C16 | C4  | C5  | 114.0(3) | C30 | C31 | C32 | 120.3(5)   |
| C4  | C5  | P1  | 105.0(3) | C31 | C32 | C33 | 120.6(5)   |
| C6  | C5  | C4  | 120.6(3) | C28 | C33 | C32 | 119.7(5)   |
| C6  | C5  | P1  | 106.9(3) | C1  | P1  | C5  | 100.41(19) |
| C5  | C6  | P2  | 106.8(3) | C1  | P1  | C7  | 92.1(2)    |
| C3  | C7  | P1  | 94.3(3)  | C1  | P1  | Pd1 | 119.54(15) |
| C9  | C8  | C1  | 121.0(5) | C5  | P1  | Pd1 | 107.70(13) |
| C9  | C8  | C13 | 118.7(5) | C7  | P1  | C5  | 91.2(2)    |
| C13 | C8  | C1  | 120.2(4) | C7  | P1  | Pd1 | 138.01(15) |
| C8  | C9  | C10 | 120.4(5) | C6  | P2  | Pd1 | 108.91(14) |
| C11 | C10 | C9  | 120.5(5) | C22 | P2  | C6  | 106.16(19) |
| C12 | C11 | C10 | 120.2(5) | C22 | P2  | Pd1 | 113.75(14) |
| C11 | C12 | C13 | 120.3(6) | C28 | P2  | C6  | 106.16(19) |
| C8  | C13 | C12 | 120.0(5) | C28 | P2  | C22 | 107.15(19) |
| C17 | C16 | C4  | 119.0(4) | C28 | P2  | Pd1 | 114.16(13) |
| C21 | C16 | C4  | 123.0(4) | C12 | Pd1 | C11 | 95.89(4)   |
| C21 | C16 | C17 | 118.0(4) | P1  | Pd1 | C11 | 89.53(4)   |
| C18 | C17 | C16 | 120.6(5) | P1  | Pd1 | C12 | 174.23(4)  |
| C19 | C18 | C17 | 121.2(5) | P1  | Pd1 | P2  | 84.88(4)   |
| C18 | C19 | C20 | 119.3(4) | P2  | Pd1 | C11 | 174.37(4)  |
| C21 | C20 | C19 | 119.0(5) | P2  | Pd1 | C12 | 89.67(4)   |

**Table 12 Torsion Angles for 7**

| <b>A</b> | <b>B</b> | <b>C</b> | <b>D</b> | <b>Angle/°</b> | <b>A</b> | <b>B</b> | <b>C</b> | <b>D</b> | <b>Angle/°</b> |
|----------|----------|----------|----------|----------------|----------|----------|----------|----------|----------------|
| C1       | C2       | C3       | C4       | -73.8(5)       | C14      | C2       | C3       | C4       | 98.9(5)        |
| C1       | C2       | C3       | C7       | 38.0(5)        | C14      | C2       | C3       | C7       | -149.3(5)      |
| C1       | C2       | C3       | C15      | 161.2(4)       | C14      | C2       | C3       | C15      | -26.1(7)       |
| C1       | C8       | C9       | C10      | 179.9(5)       | C15      | C3       | C4       | C5       | -156.4(4)      |
| C1       | C8       | C13      | C12      | -179.2(5)      | C15      | C3       | C4       | C16      | -30.3(5)       |
| C2       | C1       | C8       | C9       | 131.7(6)       | C15      | C3       | C7       | P1       | -177.5(3)      |
| C2       | C1       | C8       | C13      | -50.3(7)       | C16      | C4       | C5       | C6       | 104.0(4)       |
| C2       | C1       | P1       | C5       | 62.8(4)        | C16      | C4       | C5       | P1       | -135.5(3)      |
| C2       | C1       | P1       | C7       | -28.8(4)       | C16      | C17      | C18      | C19      | -1.2(8)        |

|     |     |     |     |             |     |     |     |     |           |
|-----|-----|-----|-----|-------------|-----|-----|-----|-----|-----------|
| C2  | C1  | P1  | Pd1 | -179.9(3)   | C17 | C16 | C21 | C20 | -0.2(7)   |
| C2  | C3  | C4  | C5  | 78.1(4)     | C17 | C18 | C19 | C20 | 0.7(9)    |
| C2  | C3  | C4  | C16 | -155.8(3)   | C18 | C19 | C20 | C21 | 0.1(8)    |
| C2  | C3  | C7  | P1  | -52.6(3)    | C19 | C20 | C21 | C16 | -0.4(8)   |
| C3  | C4  | C5  | C6  | -129.7(4)   | C21 | C16 | C17 | C18 | 1.0(7)    |
| C3  | C4  | C5  | P1  | -9.3(3)     | C22 | C23 | C24 | C25 | -1.7(10)  |
| C3  | C4  | C16 | C17 | 109.7(4)    | C23 | C22 | C27 | C26 | -0.3(8)   |
| C3  | C4  | C16 | C21 | -70.2(5)    | C23 | C22 | P2  | C6  | -13.1(5)  |
| C3  | C7  | P1  | C1  | 46.3(3)     | C23 | C22 | P2  | C28 | -126.2(4) |
| C3  | C7  | P1  | C5  | -54.1(3)    | C23 | C22 | P2  | Pd1 | 106.7(4)  |
| C3  | C7  | P1  | Pd1 | -172.64(17) | C23 | C24 | C25 | C26 | 2.4(10)   |
| C4  | C3  | C7  | P1  | 56.4(3)     | C24 | C25 | C26 | C27 | -2.0(9)   |
| C4  | C5  | C6  | P2  | 170.9(3)    | C25 | C26 | C27 | C22 | 1.0(8)    |
| C4  | C5  | P1  | C1  | -53.3(3)    | C27 | C22 | C23 | C24 | 0.6(9)    |
| C4  | C5  | P1  | C7  | 39.0(3)     | C27 | C22 | P2  | C6  | 168.8(4)  |
| C4  | C5  | P1  | Pd1 | -179.1(2)   | C27 | C22 | P2  | C28 | 55.6(4)   |
| C4  | C16 | C17 | C18 | -178.9(4)   | C27 | C22 | P2  | Pd1 | -71.5(4)  |
| C4  | C16 | C21 | C20 | 179.7(5)    | C28 | C29 | C30 | C31 | 1.2(8)    |
| C5  | C4  | C16 | C17 | -128.9(4)   | C29 | C28 | C33 | C32 | 1.1(7)    |
| C5  | C4  | C16 | C21 | 51.3(6)     | C29 | C28 | P2  | C6  | -89.8(4)  |
| C5  | C6  | P2  | C22 | 89.5(3)     | C29 | C28 | P2  | C22 | 23.3(4)   |
| C5  | C6  | P2  | C28 | -156.7(3)   | C29 | C28 | P2  | Pd1 | 150.2(3)  |
| C5  | C6  | P2  | Pd1 | -33.4(3)    | C29 | C30 | C31 | C32 | -1.7(8)   |
| C6  | C5  | P1  | C1  | 75.8(3)     | C30 | C31 | C32 | C33 | 1.8(8)    |
| C6  | C5  | P1  | C7  | 168.1(3)    | C31 | C32 | C33 | C28 | -1.5(8)   |
| C6  | C5  | P1  | Pd1 | -50.0(3)    | C33 | C28 | C29 | C30 | -0.9(7)   |
| C7  | C3  | C4  | C5  | -31.5(4)    | C33 | C28 | P2  | C6  | 89.3(4)   |
| C7  | C3  | C4  | C16 | 94.6(4)     | C33 | C28 | P2  | C22 | -157.6(3) |
| C8  | C1  | C2  | C3  | 169.5(4)    | C33 | C28 | P2  | Pd1 | -30.7(4)  |
| C8  | C1  | C2  | C14 | -2.8(9)     | P1  | C1  | C2  | C3  | -1.4(5)   |
| C8  | C1  | P1  | C5  | -108.6(4)   | P1  | C1  | C2  | C14 | -173.7(5) |
| C8  | C1  | P1  | C7  | 159.8(4)    | P1  | C1  | C8  | C9  | -59.0(6)  |
| C8  | C1  | P1  | Pd1 | 8.7(4)      | P1  | C1  | C8  | C13 | 119.1(5)  |
| C8  | C9  | C10 | C11 | -1.2(9)     | P1  | C5  | C6  | P2  | 51.4(3)   |
| C9  | C8  | C13 | C12 | -1.2(8)     | P2  | C22 | C23 | C24 | -177.6(5) |
| C9  | C10 | C11 | C12 | -0.2(10)    | P2  | C22 | C27 | C26 | 178.0(4)  |
| C10 | C11 | C12 | C13 | 0.9(10)     | P2  | C28 | C29 | C30 | 178.1(4)  |
| C11 | C12 | C13 | C8  | -0.2(10)    | P2  | C28 | C33 | C32 | -178.0(4) |
| C13 | C8  | C9  | C10 | 1.8(8)      |     |     |     |     |           |

## X-ray crystallographic studies of compound 8

### Crystal Structure of Compound 8

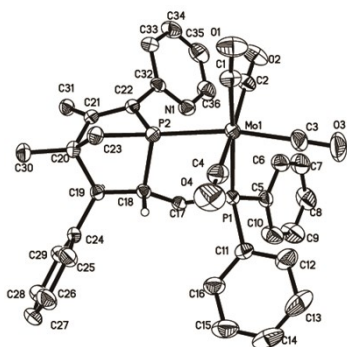

**Table 13** Crystal data and structure refinement for **8**

|                                         |                                                                  |
|-----------------------------------------|------------------------------------------------------------------|
| Identification code                     | 202009166                                                        |
| Empirical formula                       | C <sub>36</sub> H <sub>31</sub> MoNO <sub>4</sub> P <sub>2</sub> |
| Formula weight                          | 699.50                                                           |
| Temperature/K                           | 293(2)                                                           |
| Crystal system                          | triclinic                                                        |
| Space group                             | P-1                                                              |
| a/Å                                     | 13.3804(4)                                                       |
| b/Å                                     | 15.4864(5)                                                       |
| c/Å                                     | 16.7675(6)                                                       |
| $\alpha$ /°                             | 105.320(3)                                                       |
| $\beta$ /°                              | 91.827(3)                                                        |
| $\gamma$ /°                             | 92.381(3)                                                        |
| Volume/Å <sup>3</sup>                   | 3344.8(2)                                                        |
| Z                                       | 4                                                                |
| $\rho_{\text{calc}}$ /cm <sup>3</sup>   | 1.389                                                            |
| $\mu$ /mm <sup>-1</sup>                 | 4.425                                                            |
| F(000)                                  | 1432.0                                                           |
| Crystal size/mm <sup>3</sup>            | 0.15 × 0.12 × 0.08                                               |
| Radiation                               | CuK $\alpha$ ( $\lambda$ = 1.54184)                              |
| 2 $\theta$ range for data collection/°  | 6.618 to 134.16                                                  |
| Index ranges                            | -11 ≤ h ≤ 15, -18 ≤ k ≤ 18, -20 ≤ l ≤ 19                         |
| Reflections collected                   | 25314                                                            |
| Independent reflections                 | 11932 [ $R_{\text{int}}$ = 0.0357, $R_{\text{sigma}}$ = 0.0481]  |
| Data/restraints/parameters              | 11932/0/797                                                      |
| Goodness-of-fit on F <sup>2</sup>       | 1.038                                                            |
| Final R indexes [ $I \geq 2\sigma(I)$ ] | $R_1$ = 0.0371, $wR_2$ = 0.0894                                  |
| Final R indexes [all data]              | $R_1$ = 0.0483, $wR_2$ = 0.0977                                  |



Largest diff. peak/hole / e Å<sup>-3</sup>

0.42/-0.51

**Table 14 Bond Lengths for 8**

| Atom | Atom | Length/Å | Atom | Atom | Length/Å |
|------|------|----------|------|------|----------|
| C1   | Mo1  | 1.993(3) | C1'  | Mo1' | 1.986(3) |
| C1   | O1   | 1.144(4) | C1'  | O1'  | 1.142(4) |
| C2   | Mo1  | 2.057(4) | C2'  | Mo1' | 2.051(4) |
| C2   | O2   | 1.128(5) | C2'  | O2'  | 1.131(4) |
| C3   | Mo1  | 1.975(4) | C3'  | Mo1' | 1.995(4) |
| C3   | O3   | 1.148(5) | C3'  | O3'  | 1.141(5) |
| C4   | Mo1  | 2.022(4) | C4'  | Mo1' | 2.029(3) |
| C4   | O4   | 1.136(5) | C4'  | O4'  | 1.127(4) |
| C5   | C6   | 1.377(5) | C5'  | C6'  | 1.373(5) |
| C5   | C10  | 1.392(5) | C5'  | C10' | 1.382(5) |
| C5   | P1   | 1.825(3) | C5'  | P1'  | 1.833(3) |
| C6   | C7   | 1.377(6) | C6'  | C7'  | 1.380(6) |
| C7   | C8   | 1.368(7) | C7'  | C8'  | 1.363(7) |
| C8   | C9   | 1.351(7) | C8'  | C9'  | 1.363(6) |
| C9   | C10  | 1.381(6) | C9'  | C10' | 1.382(5) |
| C11  | C12  | 1.382(6) | C11' | C12' | 1.391(5) |
| C11  | C16  | 1.388(5) | C11' | C16' | 1.378(4) |
| C11  | P1   | 1.823(3) | C11' | P1'  | 1.838(3) |
| C12  | C13  | 1.401(7) | C12' | C13' | 1.373(6) |
| C13  | C14  | 1.362(8) | C13' | C14' | 1.359(7) |
| C14  | C15  | 1.370(8) | C14' | C15' | 1.370(6) |
| C15  | C16  | 1.380(6) | C15' | C16' | 1.388(5) |
| C17  | C18  | 1.517(4) | C17' | C18' | 1.518(4) |
| C17  | P1   | 1.846(3) | C17' | P1'  | 1.853(3) |
| C18  | C19  | 1.542(4) | C18' | C19' | 1.546(4) |
| C18  | P2   | 1.863(3) | C18' | P2'  | 1.862(3) |
| C19  | C20  | 1.609(4) | C19' | C20' | 1.610(4) |
| C19  | C24  | 1.509(4) | C19' | C24' | 1.518(4) |
| C20  | C21  | 1.535(4) | C20' | C21' | 1.528(4) |
| C20  | C23  | 1.544(4) | C20' | C23' | 1.547(4) |
| C20  | C30  | 1.517(4) | C20' | C30' | 1.524(4) |
| C21  | C22  | 1.345(4) | C21' | C22' | 1.342(5) |
| C21  | C31  | 1.498(4) | C21' | C31' | 1.503(4) |
| C22  | C32  | 1.476(4) | C22' | C32' | 1.473(4) |
| C22  | P2   | 1.832(3) | C22' | P2'  | 1.831(3) |

|     |     |           |      |      |           |
|-----|-----|-----------|------|------|-----------|
| C23 | P2  | 1.834(3)  | C23' | P2'  | 1.840(3)  |
| C24 | C25 | 1.389(5)  | C24' | C25' | 1.387(5)  |
| C24 | C29 | 1.386(5)  | C24' | C29' | 1.389(5)  |
| C25 | C26 | 1.395(5)  | C25' | C26' | 1.384(5)  |
| C26 | C27 | 1.368(7)  | C26' | C27' | 1.381(6)  |
| C27 | C28 | 1.365(7)  | C27' | C28' | 1.363(6)  |
| C28 | C29 | 1.396(5)  | C28' | C29' | 1.386(5)  |
| C32 | C33 | 1.391(5)  | C32' | C33' | 1.385(5)  |
| C32 | N1  | 1.333(4)  | C32' | N1'  | 1.339(5)  |
| C33 | C34 | 1.391(6)  | C33' | C34' | 1.389(6)  |
| C34 | C35 | 1.347(7)  | C34' | C35' | 1.368(7)  |
| C35 | C36 | 1.372(6)  | C35' | C36' | 1.379(6)  |
| C36 | N1  | 1.340(5)  | C36' | N1'  | 1.332(5)  |
| Mo1 | P1  | 2.5448(8) | Mo1' | P1'  | 2.5387(8) |
| Mo1 | P2  | 2.4923(8) | Mo1' | P2'  | 2.4877(8) |

**Table 15 Bond Angles for 8**

| <b>Atom</b> | <b>Atom</b> | <b>Atom</b> | <b>Atom Angle/°</b> | <b>Atom</b> | <b>Atom</b> | <b>Atom</b> | <b>Atom Angle/°</b> |
|-------------|-------------|-------------|---------------------|-------------|-------------|-------------|---------------------|
| O1          | C1          | Mo1         | 175.7(4)            | O1'         | C1'         | Mo1'        | 175.9(3)            |
| O2          | C2          | Mo1         | 173.2(3)            | O2'         | C2'         | Mo1'        | 172.4(3)            |
| O3          | C3          | Mo1         | 177.2(5)            | O3'         | C3'         | Mo1'        | 174.9(4)            |
| O4          | C4          | Mo1         | 175.0(4)            | O4'         | C4'         | Mo1'        | 174.6(3)            |
| C6          | C5          | C10         | 117.7(4)            | C6'         | C5'         | C10'        | 118.5(3)            |
| C6          | C5          | P1          | 119.9(3)            | C6'         | C5'         | P1'         | 119.9(3)            |
| C10         | C5          | P1          | 122.2(3)            | C10'        | C5'         | P1'         | 121.6(3)            |
| C5          | C6          | C7          | 120.8(4)            | C5'         | C6'         | C7'         | 120.1(4)            |
| C8          | C7          | C6          | 121.0(4)            | C8'         | C7'         | C6'         | 121.2(4)            |
| C9          | C8          | C7          | 118.8(4)            | C9'         | C8'         | C7'         | 119.1(4)            |
| C8          | C9          | C10         | 121.4(4)            | C8'         | C9'         | C10'        | 120.4(4)            |
| C9          | C10         | C5          | 120.3(4)            | C9'         | C10'        | C5'         | 120.6(4)            |
| C12         | C11         | C16         | 117.4(4)            | C12'        | C11'        | P1'         | 121.5(3)            |
| C12         | C11         | P1          | 118.9(3)            | C16'        | C11'        | C12'        | 117.9(3)            |
| C16         | C11         | P1          | 123.7(3)            | C16'        | C11'        | P1'         | 120.6(3)            |
| C11         | C12         | C13         | 120.7(5)            | C13'        | C12'        | C11'        | 120.3(4)            |
| C14         | C13         | C12         | 120.5(5)            | C14'        | C13'        | C12'        | 121.3(4)            |
| C13         | C14         | C15         | 119.4(5)            | C13'        | C14'        | C15'        | 119.5(4)            |
| C14         | C15         | C16         | 120.4(5)            | C14'        | C15'        | C16'        | 119.8(4)            |
| C15         | C16         | C11         | 121.5(5)            | C11'        | C16'        | C15'        | 121.2(3)            |
| C18         | C17         | P1          | 108.9(2)            | C18'        | C17'        | P1'         | 109.9(2)            |
| C17         | C18         | C19         | 117.1(2)            | C17'        | C18'        | C19'        | 117.4(2)            |
| C17         | C18         | P2          | 110.0(2)            | C17'        | C18'        | P2'         | 111.3(2)            |

|     |     |     |            |      |      |      |            |
|-----|-----|-----|------------|------|------|------|------------|
| C19 | C18 | P2  | 106.6(2)   | C19' | C18' | P2'  | 106.41(19) |
| C18 | C19 | C20 | 105.4(2)   | C18' | C19' | C20' | 105.5(2)   |
| C24 | C19 | C18 | 113.6(2)   | C24' | C19' | C18' | 113.4(2)   |
| C24 | C19 | C20 | 117.2(3)   | C24' | C19' | C20' | 116.9(2)   |
| C21 | C20 | C19 | 100.7(2)   | C21' | C20' | C19' | 101.2(2)   |
| C21 | C20 | C23 | 103.5(3)   | C21' | C20' | C23' | 103.8(2)   |
| C23 | C20 | C19 | 107.0(2)   | C23' | C20' | C19' | 106.8(2)   |
| C30 | C20 | C19 | 114.3(3)   | C30' | C20' | C19' | 113.7(3)   |
| C30 | C20 | C21 | 115.4(3)   | C30' | C20' | C21' | 116.5(3)   |
| C30 | C20 | C23 | 114.5(3)   | C30' | C20' | C23' | 113.6(3)   |
| C22 | C21 | C20 | 112.8(3)   | C22' | C21' | C20' | 112.7(3)   |
| C22 | C21 | C31 | 126.2(3)   | C22' | C21' | C31' | 126.8(3)   |
| C31 | C21 | C20 | 120.0(3)   | C31' | C21' | C20' | 119.7(3)   |
| C21 | C22 | C32 | 124.3(3)   | C21' | C22' | C32' | 126.8(3)   |
| C21 | C22 | P2  | 108.7(2)   | C21' | C22' | P2'  | 108.9(2)   |
| C32 | C22 | P2  | 125.9(2)   | C32' | C22' | P2'  | 123.1(2)   |
| C20 | C23 | P2  | 97.5(2)    | C20' | C23' | P2'  | 97.1(2)    |
| C25 | C24 | C19 | 123.3(3)   | C25' | C24' | C19' | 123.2(3)   |
| C29 | C24 | C19 | 118.5(3)   | C25' | C24' | C29' | 118.3(3)   |
| C29 | C24 | C25 | 118.2(3)   | C29' | C24' | C19' | 118.4(3)   |
| C24 | C25 | C26 | 120.1(4)   | C26' | C25' | C24' | 120.5(3)   |
| C27 | C26 | C25 | 120.8(4)   | C27' | C26' | C25' | 120.6(4)   |
| C28 | C27 | C26 | 120.0(4)   | C28' | C27' | C26' | 119.3(3)   |
| C27 | C28 | C29 | 119.8(4)   | C27' | C28' | C29' | 120.7(4)   |
| C24 | C29 | C28 | 121.1(4)   | C28' | C29' | C24' | 120.6(4)   |
| C33 | C32 | C22 | 121.5(3)   | C33' | C32' | C22' | 122.0(3)   |
| N1  | C32 | C22 | 116.1(3)   | N1'  | C32' | C22' | 115.3(3)   |
| N1  | C32 | C33 | 122.3(3)   | N1'  | C32' | C33' | 122.7(3)   |
| C34 | C33 | C32 | 118.6(4)   | C32' | C33' | C34' | 118.5(4)   |
| C35 | C34 | C33 | 119.0(4)   | C35' | C34' | C33' | 119.2(4)   |
| C34 | C35 | C36 | 119.2(4)   | C34' | C35' | C36' | 118.3(4)   |
| N1  | C36 | C35 | 123.7(4)   | N1'  | C36' | C35' | 123.9(4)   |
| C1  | Mo1 | C2  | 85.28(14)  | C1'  | Mo1' | C2'  | 84.31(14)  |
| C1  | Mo1 | C4  | 85.44(15)  | C1'  | Mo1' | C3'  | 93.07(14)  |
| C1  | Mo1 | P1  | 174.22(11) | C1'  | Mo1' | C4'  | 86.98(14)  |
| C1  | Mo1 | P2  | 100.65(11) | C1'  | Mo1' | P1'  | 179.23(10) |
| C2  | Mo1 | P1  | 100.47(10) | C1'  | Mo1' | P2'  | 100.86(10) |
| C2  | Mo1 | P2  | 92.40(11)  | C2'  | Mo1' | P1'  | 95.73(10)  |
| C3  | Mo1 | C1  | 93.63(16)  | C2'  | Mo1' | P2'  | 95.11(12)  |
| C3  | Mo1 | C2  | 88.49(19)  | C3'  | Mo1' | C2'  | 94.19(16)  |

|     |     |     |            |      |      |      |            |
|-----|-----|-----|------------|------|------|------|------------|
| C3  | Mo1 | C4  | 91.9(2)    | C3'  | Mo1' | C4'  | 85.30(15)  |
| C3  | Mo1 | P1  | 87.10(12)  | C3'  | Mo1' | P1'  | 87.70(11)  |
| C3  | Mo1 | P2  | 165.71(12) | C3'  | Mo1' | P2'  | 163.94(11) |
| C4  | Mo1 | C2  | 170.72(15) | C4'  | Mo1' | C2'  | 171.24(14) |
| C4  | Mo1 | P1  | 88.80(12)  | C4'  | Mo1' | P1'  | 92.99(10)  |
| C4  | Mo1 | P2  | 89.51(11)  | C4'  | Mo1' | P2'  | 87.46(9)   |
| P2  | Mo1 | P1  | 78.71(2)   | P2'  | Mo1' | P1'  | 78.37(2)   |
| C32 | N1  | C36 | 117.2(3)   | C36' | N1'  | C32' | 117.3(3)   |
| C5  | P1  | C17 | 101.41(15) | C5'  | P1'  | C11' | 101.52(14) |
| C5  | P1  | Mo1 | 122.64(11) | C5'  | P1'  | C17' | 103.64(15) |
| C11 | P1  | C5  | 101.99(16) | C5'  | P1'  | Mo1' | 120.63(11) |
| C11 | P1  | C17 | 104.73(16) | C11' | P1'  | C17' | 103.73(14) |
| C11 | P1  | Mo1 | 114.28(12) | C11' | P1'  | Mo1' | 114.56(10) |
| C17 | P1  | Mo1 | 109.76(10) | C17' | P1'  | Mo1' | 110.89(9)  |
| C18 | P2  | Mo1 | 106.71(9)  | C18' | P2'  | Mo1' | 105.64(9)  |
| C22 | P2  | C18 | 98.46(13)  | C22' | P2'  | C18' | 98.36(13)  |
| C22 | P2  | C23 | 89.39(14)  | C22' | P2'  | C23' | 89.36(14)  |
| C22 | P2  | Mo1 | 125.73(10) | C22' | P2'  | Mo1' | 129.12(11) |
| C23 | P2  | C18 | 87.53(14)  | C23' | P2'  | C18' | 87.75(14)  |
| C23 | P2  | Mo1 | 137.84(11) | C23' | P2'  | Mo1' | 134.90(11) |

**Table 16 Torsion Angles for 8**

| A   | B   | C   | D   | Angle/°   | A    | B    | C    | D    | Angle/°   |
|-----|-----|-----|-----|-----------|------|------|------|------|-----------|
| C5  | C6  | C7  | C8  | -0.7(8)   | C5'  | C6'  | C7'  | C8'  | -0.1(8)   |
| C6  | C5  | C10 | C9  | 0.0(7)    | C6'  | C5'  | C10' | C9'  | -0.2(6)   |
| C6  | C5  | P1  | C11 | -150.9(3) | C6'  | C5'  | P1'  | C11' | -107.5(3) |
| C6  | C5  | P1  | C17 | 101.1(3)  | C6'  | C5'  | P1'  | C17' | 145.1(3)  |
| C6  | C5  | P1  | Mo1 | -21.5(4)  | C6'  | C5'  | P1'  | Mo1' | 20.4(4)   |
| C6  | C7  | C8  | C9  | 0.8(9)    | C6'  | C7'  | C8'  | C9'  | 0.6(9)    |
| C7  | C8  | C9  | C10 | -0.5(10)  | C7'  | C8'  | C9'  | C10' | -0.8(8)   |
| C8  | C9  | C10 | C5  | 0.1(9)    | C8'  | C9'  | C10' | C5'  | 0.7(7)    |
| C10 | C5  | C6  | C7  | 0.3(7)    | C10' | C5'  | C6'  | C7'  | -0.1(7)   |
| C10 | C5  | P1  | C11 | 34.7(4)   | C10' | C5'  | P1'  | C11' | 72.2(3)   |
| C10 | C5  | P1  | C17 | -73.3(4)  | C10' | C5'  | P1'  | C17' | -35.2(3)  |
| C10 | C5  | P1  | Mo1 | 164.1(3)  | C10' | C5'  | P1'  | Mo1' | -159.9(3) |
| C11 | C12 | C13 | C14 | -0.2(9)   | C11' | C12' | C13' | C14' | 0.2(9)    |
| C12 | C11 | C16 | C15 | -1.8(7)   | C12' | C11' | C16' | C15' | -1.4(6)   |
| C12 | C11 | P1  | C5  | 70.4(4)   | C12' | C11' | P1'  | C5'  | 30.1(4)   |
| C12 | C11 | P1  | C17 | 175.8(4)  | C12' | C11' | P1'  | C17' | 137.4(3)  |

|     |     |     |     |             |      |      |      |      |             |
|-----|-----|-----|-----|-------------|------|------|------|------|-------------|
| C12 | C11 | P1  | Mo1 | -64.1(4)    | C12' | C11' | P1'  | Mo1' | -101.5(3)   |
| C12 | C13 | C14 | C15 | -1.6(9)     | C12' | C13' | C14' | C15' | -1.5(9)     |
| C13 | C14 | C15 | C16 | 1.7(9)      | C13' | C14' | C15' | C16' | 1.3(7)      |
| C14 | C15 | C16 | C11 | 0.1(8)      | C14' | C15' | C16' | C11' | 0.1(6)      |
| C16 | C11 | C12 | C13 | 1.9(7)      | C16' | C11' | C12' | C13' | 1.2(7)      |
| C16 | C11 | P1  | C5  | -108.3(3)   | C16' | C11' | P1'  | C5'  | -152.0(3)   |
| C16 | C11 | P1  | C17 | -3.0(4)     | C16' | C11' | P1'  | C17' | -44.7(3)    |
| C16 | C11 | P1  | Mo1 | 117.2(3)    | C16' | C11' | P1'  | Mo1' | 76.3(3)     |
| C17 | C18 | C19 | C20 | -138.1(3)   | C17' | C18' | C19' | C20' | -139.2(3)   |
| C17 | C18 | C19 | C24 | 92.3(3)     | C17' | C18' | C19' | C24' | 91.6(3)     |
| C17 | C18 | P2  | C22 | 80.2(2)     | C17' | C18' | P2'  | C22' | 81.1(2)     |
| C17 | C18 | P2  | C23 | 169.2(2)    | C17' | C18' | P2'  | C23' | 170.1(2)    |
| C17 | C18 | P2  | Mo1 | -51.1(2)    | C17' | C18' | P2'  | Mo1' | -53.7(2)    |
| C18 | C17 | P1  | C5  | -165.5(2)   | C18' | C17' | P1'  | C5'  | -153.8(2)   |
| C18 | C17 | P1  | C11 | 88.7(2)     | C18' | C17' | P1'  | C11' | 100.5(2)    |
| C18 | C17 | P1  | Mo1 | -34.4(2)    | C18' | C17' | P1'  | Mo1' | -23.0(2)    |
| C18 | C19 | C20 | C21 | 81.9(3)     | C18' | C19' | C20' | C21' | 81.5(3)     |
| C18 | C19 | C20 | C23 | -25.9(3)    | C18' | C19' | C20' | C23' | -26.8(3)    |
| C18 | C19 | C20 | C30 | -153.8(3)   | C18' | C19' | C20' | C30' | -152.9(3)   |
| C18 | C19 | C24 | C25 | 53.3(4)     | C18' | C19' | C24' | C25' | 49.4(4)     |
| C18 | C19 | C24 | C29 | -124.9(3)   | C18' | C19' | C24' | C29' | -127.9(3)   |
| C19 | C18 | P2  | C22 | -47.7(2)    | C19' | C18' | P2'  | C22' | -47.9(2)    |
| C19 | C18 | P2  | C23 | 41.3(2)     | C19' | C18' | P2'  | C23' | 41.1(2)     |
| C19 | C18 | P2  | Mo1 | -179.07(17) | C19' | C18' | P2'  | Mo1' | 177.36(16)  |
| C19 | C20 | C21 | C22 | -73.8(3)    | C19' | C20' | C21' | C22' | -73.3(3)    |
| C19 | C20 | C21 | C31 | 95.4(3)     | C19' | C20' | C21' | C31' | 96.9(3)     |
| C19 | C20 | C23 | P2  | 54.3(3)     | C19' | C20' | C23' | P2'  | 54.8(2)     |
| C19 | C24 | C25 | C26 | -177.5(4)   | C19' | C24' | C25' | C26' | -177.4(3)   |
| C19 | C24 | C29 | C28 | 178.0(4)    | C19' | C24' | C29' | C28' | 178.6(3)    |
| C20 | C19 | C24 | C25 | -70.1(4)    | C20' | C19' | C24' | C25' | -73.8(4)    |
| C20 | C19 | C24 | C29 | 111.7(3)    | C20' | C19' | C24' | C29' | 109.0(3)    |
| C20 | C21 | C22 | C32 | 166.7(3)    | C20' | C21' | C22' | C32' | 165.5(3)    |
| C20 | C21 | C22 | P2  | -1.9(3)     | C20' | C21' | C22' | P2'  | -2.3(3)     |
| C20 | C23 | P2  | C18 | -54.0(2)    | C20' | C23' | P2'  | C18' | -54.24(19)  |
| C20 | C23 | P2  | C22 | 44.5(2)     | C20' | C23' | P2'  | C22' | 44.1(2)     |
| C20 | C23 | P2  | Mo1 | -166.41(14) | C20' | C23' | P2'  | Mo1' | -164.24(13) |
| C21 | C20 | C23 | P2  | -51.5(2)    | C21' | C20' | C23' | P2'  | -51.6(2)    |
| C21 | C22 | C32 | C33 | 67.0(4)     | C21' | C22' | C32' | C33' | 59.5(5)     |
| C21 | C22 | C32 | N1  | -110.1(4)   | C21' | C22' | C32' | N1'  | -119.3(4)   |
| C21 | C22 | P2  | C18 | 60.7(2)     | C21' | C22' | P2'  | C18' | 61.2(2)     |

|     |     |     |     |            |      |      |      |      |            |
|-----|-----|-----|-----|------------|------|------|------|------|------------|
| C21 | C22 | P2  | C23 | -26.7(2)   | C21' | C22' | P2'  | C23' | -26.5(2)   |
| C21 | C22 | P2  | Mo1 | 178.38(17) | C21' | C22' | P2'  | Mo1' | 179.27(17) |
| C22 | C32 | C33 | C34 | -174.1(3)  | C22' | C32' | C33' | C34' | -177.6(4)  |
| C22 | C32 | N1  | C36 | 175.0(3)   | C22' | C32' | N1'  | C36' | 178.5(3)   |
| C23 | C20 | C21 | C22 | 36.8(3)    | C23' | C20' | C21' | C22' | 37.3(3)    |
| C23 | C20 | C21 | C31 | -154.1(3)  | C23' | C20' | C21' | C31' | -152.5(3)  |
| C24 | C19 | C20 | C21 | -150.6(3)  | C24' | C19' | C20' | C21' | -151.4(3)  |
| C24 | C19 | C20 | C23 | 101.6(3)   | C24' | C19' | C20' | C23' | 100.3(3)   |
| C24 | C19 | C20 | C30 | -26.3(4)   | C24' | C19' | C20' | C30' | -25.8(4)   |
| C24 | C25 | C26 | C27 | -0.2(7)    | C24' | C25' | C26' | C27' | -0.1(6)    |
| C25 | C24 | C29 | C28 | -0.3(6)    | C25' | C24' | C29' | C28' | 1.2(5)     |
| C25 | C26 | C27 | C28 | -0.8(7)    | C25' | C26' | C27' | C28' | -0.8(6)    |
| C26 | C27 | C28 | C29 | 1.2(7)     | C26' | C27' | C28' | C29' | 1.9(6)     |
| C27 | C28 | C29 | C24 | -0.6(7)    | C27' | C28' | C29' | C24' | -2.1(6)    |
| C29 | C24 | C25 | C26 | 0.7(6)     | C29' | C24' | C25' | C26' | -0.1(5)    |
| C30 | C20 | C21 | C22 | 162.7(3)   | C30' | C20' | C21' | C22' | 163.0(3)   |
| C30 | C20 | C21 | C31 | -28.2(4)   | C30' | C20' | C21' | C31' | -26.8(4)   |
| C30 | C20 | C23 | P2  | -178.0(2)  | C30' | C20' | C23' | P2'  | -179.1(2)  |
| C31 | C21 | C22 | C32 | -1.7(5)    | C31' | C21' | C22' | C32' | -3.9(6)    |
| C31 | C21 | C22 | P2  | -170.2(3)  | C31' | C21' | C22' | P2'  | -171.7(3)  |
| C32 | C22 | P2  | C18 | -107.7(3)  | C32' | C22' | P2'  | C18' | -107.2(3)  |
| C32 | C22 | P2  | C23 | 164.9(3)   | C32' | C22' | P2'  | C23' | 165.2(3)   |
| C32 | C22 | P2  | Mo1 | 10.1(3)    | C32' | C22' | P2'  | Mo1' | 10.9(3)    |
| C32 | C33 | C34 | C35 | -1.3(7)    | C32' | C33' | C34' | C35' | -0.9(7)    |
| C33 | C32 | N1  | C36 | -2.1(5)    | C33' | C32' | N1'  | C36' | -0.3(6)    |
| C33 | C34 | C35 | C36 | -0.8(8)    | C33' | C34' | C35' | C36' | -0.1(8)    |
| C34 | C35 | C36 | N1  | 1.6(8)     | C34' | C35' | C36' | N1'  | 1.0(8)     |
| C35 | C36 | N1  | C32 | -0.2(6)    | C35' | C36' | N1'  | C32' | -0.8(7)    |
| N1  | C32 | C33 | C34 | 2.9(6)     | N1'  | C32' | C33' | C34' | 1.1(6)     |
| P1  | C5  | C6  | C7  | -174.3(4)  | P1'  | C5'  | C6'  | C7'  | 179.6(4)   |
| P1  | C5  | C10 | C9  | 174.5(4)   | P1'  | C5'  | C10' | C9'  | -179.9(3)  |
| P1  | C11 | C12 | C13 | -177.0(4)  | P1'  | C11' | C12' | C13' | 179.2(4)   |
| P1  | C11 | C16 | C15 | 176.9(4)   | P1'  | C11' | C16' | C15' | -179.3(3)  |
| P1  | C17 | C18 | C19 | 177.1(2)   | P1'  | C17' | C18' | C19' | 172.3(2)   |
| P1  | C17 | C18 | P2  | 55.3(2)    | P1'  | C17' | C18' | P2'  | 49.4(2)    |
| P2  | C18 | C19 | C20 | -14.5(3)   | P2'  | C18' | C19' | C20' | -13.9(3)   |
| P2  | C18 | C19 | C24 | -144.1(2)  | P2'  | C18' | C19' | C24' | -143.1(2)  |
| P2  | C22 | C32 | C33 | -126.4(3)  | P2'  | C22' | C32' | C33' | -134.3(3)  |
| P2  | C22 | C32 | N1  | 56.5(4)    | P2'  | C22' | C32' | N1'  | 46.9(4)    |

## Computational Methods and Results

### Computational Methods

Gaussian 09 program was employed to perform the theoretical study. The geometry optimization was carried out by using the B3LYP functional with 6-31G(d, p) basis set and accounting for the xylene solvent ( $\epsilon=2.3879$ ) effect by employing the SMD solvation model (B3LYP-D3/6-31G(d, p)/SMD<sub>xylene</sub>). Then, frequency calculations at the same level of theory were carried out to identify all of the stationary points as minima (zero imaginary frequency) and to provide corrections for free energies.

### Energies, Cartesian coordinates, and representative vibrational frequencies of the listed compounds

#### R1

Zero-point correction= 0.213783

Thermal correction to Energy= 0.226226

Thermal correction to Enthalpy= 0.227170

Thermal correction to Gibbs Free Energy= 0.174596

Sum of electronic and zero-point Energies= -806.271103

Sum of electronic and thermal Energies= -806.258660

Sum of electronic and thermal Enthalpies= -806.257716

Sum of electronic and thermal Free Energies= -806.310290

#### Cartesian coordinates

|   |           |           |           |
|---|-----------|-----------|-----------|
| C | 3.351257  | -0.747288 | 0.779495  |
| C | 1.969463  | -0.935095 | 0.765004  |
| C | 1.137078  | -0.115325 | -0.018538 |
| C | 1.737714  | 0.899455  | -0.787152 |
| C | 3.118752  | 1.083672  | -0.774913 |
| C | 3.931850  | 0.262823  | 0.010648  |
| H | 3.973655  | -1.388566 | 1.396820  |
| H | 1.519529  | -1.711058 | 1.376453  |
| H | 1.117726  | 1.527904  | -1.417950 |
| H | 3.561425  | 1.866831  | -1.383615 |
| H | 5.007637  | 0.410476  | 0.023377  |
| C | -0.325197 | -0.343909 | -0.060006 |

|   |           |           |           |
|---|-----------|-----------|-----------|
| C | -1.309265 | 0.728740  | 0.149623  |
| C | -2.597707 | 0.292786  | 0.063468  |
| P | -1.001138 | -1.893782 | -0.368197 |
| C | -0.894602 | 2.142811  | 0.475285  |
| H | -1.673423 | 2.671490  | 1.029398  |
| H | 0.016383  | 2.154604  | 1.079373  |
| H | -0.684414 | 2.725800  | -0.429069 |
| C | -3.845012 | 1.109382  | 0.230234  |
| H | -3.640453 | 2.150169  | 0.489480  |
| H | -4.434153 | 1.108287  | -0.696069 |
| H | -4.490033 | 0.684683  | 1.009653  |
| C | -2.722266 | -1.170667 | -0.226410 |
| H | -3.278916 | -1.352502 | -1.157065 |
| H | -3.290279 | -1.685703 | 0.561732  |

#### Vibrational frequencies

|          |          |          |
|----------|----------|----------|
| 50.7291  | 72.7691  | 87.1760  |
| 96.4660  | 149.9935 | 163.6256 |
| 202.4181 | 262.8709 | 283.4856 |
| 301.7068 | 338.7600 | 401.0441 |
| 421.7467 | 474.0633 | 508.1287 |
| 528.6414 | 585.7738 | 626.2751 |
| 647.6596 | 674.3658 | 713.7829 |
| 721.8047 | 727.1593 | 775.2756 |
| 826.2394 | 862.6786 | 934.0646 |
| 966.1837 | 978.8417 | 998.2775 |

#### R2

Zero-point correction= 0.137716

Thermal correction to Energy= 0.145415

Thermal correction to Enthalpy= 0.146359

Thermal correction to Gibbs Free Energy= 0.105104

Sum of electronic and zero-point Energies= -347.603685

Sum of electronic and thermal Energies= -347.595986

Sum of electronic and thermal Enthalpies= -347.595042

Sum of electronic and thermal Free Energies= -347.636297

#### Cartesian coordinates

|   |          |           |           |
|---|----------|-----------|-----------|
| C | 2.523653 | -0.209570 | 0.000019  |
| C | 3.613462 | 0.509000  | -0.000095 |
| H | 4.090719 | 0.821549  | 0.927177  |
| H | 4.090573 | 0.821269  | -0.927551 |
| C | 1.421080 | -0.926197 | 0.000109  |
| H | 1.518605 | -2.012292 | 0.000088  |
| C | 0.044730 | -0.395177 | 0.000039  |



|   |           |           |           |
|---|-----------|-----------|-----------|
| C | -1.037904 | -1.289448 | 0.000003  |
| C | -0.224845 | 0.985283  | 0.000083  |
| C | -2.351857 | -0.820872 | -0.000055 |
| H | -0.845281 | -2.359249 | -0.000038 |
| C | -1.536023 | 1.451266  | 0.000016  |
| H | 0.604544  | 1.686719  | 0.000107  |
| C | -2.607064 | 0.551097  | -0.000067 |
| H | -3.175613 | -1.528871 | -0.000116 |
| H | -1.725747 | 2.520874  | 0.000074  |
| H | -3.629193 | 0.917705  | -0.000057 |

#### Vibrational frequencies

|           |           |           |
|-----------|-----------|-----------|
| 60.8055   | 119.4915  | 210.8901  |
| 335.7596  | 335.8245  | 415.1324  |
| 441.6804  | 452.6845  | 616.4282  |
| 632.2691  | 650.2847  | 711.5306  |
| 783.3399  | 832.2605  | 859.0010  |
| 876.8012  | 908.0697  | 933.2579  |
| 976.0430  | 1000.1293 | 1013.2624 |
| 1016.0304 | 1053.8970 | 1099.2421 |
| 1127.5271 | 1193.8356 | 1214.3275 |
| 1230.6682 | 1323.9540 | 1366.7080 |

#### TS1

|                                              |          |              |
|----------------------------------------------|----------|--------------|
| Zero-point correction=                       | 0.353249 |              |
| Thermal correction to Energy=                | 0.373752 |              |
| Thermal correction to Enthalpy=              | 0.374697 |              |
| Thermal correction to Gibbs Free Energy=     |          | 0.303498     |
| Sum of electronic and zero-point Energies=   |          | -1153.870903 |
| Sum of electronic and thermal Energies=      |          | -1153.850400 |
| Sum of electronic and thermal Enthalpies=    |          | -1153.849455 |
| Sum of electronic and thermal Free Energies= |          | -1153.920654 |

#### Cartesian coordinates

|   |           |           |           |
|---|-----------|-----------|-----------|
| C | -4.475664 | -1.561666 | -0.810706 |
| C | -3.194030 | -1.244968 | -0.364984 |
| C | -2.882807 | 0.054569  | 0.082700  |
| C | -3.906924 | 1.021584  | 0.065219  |
| C | -5.188424 | 0.702406  | -0.380081 |
| C | -5.479835 | -0.590532 | -0.821037 |
| H | -4.688886 | -2.568622 | -1.158197 |
| H | -2.412162 | -1.998078 | -0.385480 |
| H | -3.698717 | 2.022769  | 0.428578  |
| H | -5.963070 | 1.464034  | -0.376189 |

|   |           |           |           |
|---|-----------|-----------|-----------|
| H | -6.478246 | -0.838185 | -1.169095 |
| C | -1.532970 | 0.373154  | 0.582036  |
| C | -0.767706 | 1.524991  | 0.188071  |
| C | 0.483761  | 1.587020  | 0.774599  |
| P | -0.632400 | -0.724995 | 1.605232  |
| C | -1.254337 | 2.524702  | -0.835077 |
| H | -0.423478 | 2.925099  | -1.421359 |
| H | -1.965970 | 2.068752  | -1.526755 |
| H | -1.759013 | 3.376140  | -0.363326 |
| C | 1.517820  | 2.647596  | 0.574801  |
| H | 2.461598  | 2.201754  | 0.231678  |
| H | 1.217822  | 3.409641  | -0.147266 |
| H | 1.739146  | 3.152620  | 1.523987  |
| C | 0.699670  | 0.550890  | 1.829779  |
| H | 0.537308  | 0.998537  | 2.824351  |
| H | 1.708815  | 0.129473  | 1.833582  |
| C | 0.580224  | -1.726946 | -0.165323 |
| C | 0.330370  | -3.027566 | -0.100260 |
| H | 0.723034  | -3.693669 | -0.867709 |
| H | -0.264176 | -3.477592 | 0.688097  |
| C | 1.292899  | -0.774063 | -0.842010 |
| H | 0.765373  | -0.132893 | -1.543261 |
| C | 2.712347  | -0.526055 | -0.668310 |
| C | 3.351595  | 0.473098  | -1.435589 |
| C | 3.498862  | -1.257617 | 0.250807  |
| C | 4.716256  | 0.718194  | -1.301925 |
| H | 2.763839  | 1.049457  | -2.145249 |
| C | 4.858595  | -1.000597 | 0.387741  |
| H | 3.026347  | -2.032386 | 0.846559  |
| C | 5.478250  | -0.014104 | -0.387821 |
| H | 5.185429  | 1.486959  | -1.909338 |
| H | 5.442580  | -1.574607 | 1.101691  |
| H | 6.540712  | 0.181165  | -0.279571 |

Vibrational frequencies

|           |          |          |
|-----------|----------|----------|
| -253.4298 | 25.9154  | 43.2580  |
| 55.1793   | 65.0797  | 72.3178  |
| 82.1286   | 98.3819  | 103.8396 |
| 132.6384  | 143.3172 | 150.1277 |
| 190.5526  | 207.8878 | 239.4710 |
| 266.3472  | 278.6450 | 287.6638 |
| 335.8349  | 344.1220 | 367.0836 |
| 385.1487  | 412.6510 | 420.4906 |
| 424.0796  | 463.0980 | 474.7580 |

495.3465

518.7197

529.6511

**TS2**

Zero-point correction= 0.353699

Thermal correction to Energy= 0.373990

Thermal correction to Enthalpy= 0.374934

Thermal correction to Gibbs Free Energy= 0.303624

Sum of electronic and zero-point Energies= -1153.862159

Sum of electronic and thermal Energies= -1153.841868

Sum of electronic and thermal Enthalpies= -1153.840924

Sum of electronic and thermal Free Energies= -1153.912234

## Cartesian coordinates

|   |           |           |           |
|---|-----------|-----------|-----------|
| C | 3.203817  | -2.834211 | 0.759146  |
| C | 2.409805  | -1.693658 | 0.649174  |
| C | 2.917204  | -0.511463 | 0.077167  |
| C | 4.243449  | -0.516583 | -0.389882 |
| C | 5.037665  | -1.657450 | -0.279039 |
| C | 4.522406  | -2.820098 | 0.298102  |
| H | 2.789869  | -3.737286 | 1.198697  |
| H | 1.378024  | -1.718129 | 0.986391  |
| H | 4.649229  | 0.388810  | -0.831268 |
| H | 6.061618  | -1.636991 | -0.641040 |
| H | 5.141593  | -3.707978 | 0.385893  |
| C | 2.057898  | 0.681435  | -0.082801 |
| C | 1.212472  | 1.209908  | 0.925472  |
| C | 0.353137  | 2.216942  | 0.461780  |
| P | 1.778007  | 1.397504  | -1.657036 |
| C | 1.188602  | 0.734432  | 2.357444  |
| H | 0.287805  | 0.142622  | 2.560041  |
| H | 2.052668  | 0.109027  | 2.586453  |
| H | 1.185613  | 1.579140  | 3.053761  |
| C | -0.495553 | 3.071286  | 1.359950  |
| H | 0.093234  | 3.910815  | 1.754105  |
| H | -1.346238 | 3.490000  | 0.815609  |
| H | -0.878312 | 2.517725  | 2.221355  |
| C | 0.775420  | 2.750733  | -0.872725 |
| H | 1.462343  | 3.596837  | -0.707613 |
| H | -0.044521 | 3.107534  | -1.499415 |
| C | -1.130985 | 0.644463  | -0.589807 |
| C | -0.527110 | 0.301708  | -1.755320 |
| H | -0.769591 | 0.826125  | -2.676894 |
| H | -0.089052 | -0.685496 | -1.876504 |
| C | -2.119201 | 0.526646  | 0.285152  |

|   |           |           |           |
|---|-----------|-----------|-----------|
| H | -2.075938 | 1.042934  | 1.240454  |
| C | -3.351065 | -0.265051 | 0.078428  |
| C | -4.309790 | -0.302572 | 1.106017  |
| C | -3.610948 | -0.988486 | -1.099188 |
| C | -5.485776 | -1.038865 | 0.966854  |
| H | -4.126462 | 0.252506  | 2.022934  |
| C | -4.784817 | -1.724214 | -1.237869 |
| H | -2.884588 | -0.966451 | -1.905512 |
| C | -5.729182 | -1.754294 | -0.206765 |
| H | -6.211570 | -1.053096 | 1.775053  |
| H | -4.966321 | -2.276585 | -2.155664 |
| H | -6.644192 | -2.328281 | -0.319040 |

#### Vibrational frequencies

|           |          |          |
|-----------|----------|----------|
| -328.9142 | 18.4335  | 33.2257  |
| 46.8515   | 64.6275  | 74.7999  |
| 84.4644   | 105.5848 | 127.9529 |
| 147.9386  | 156.1790 | 170.2741 |
| 196.6467  | 221.7679 | 252.8587 |
| 270.7634  | 280.1574 | 299.9415 |
| 330.9949  | 336.0258 | 349.4406 |
| 402.2522  | 418.6746 | 421.0502 |
| 433.9341  | 458.0364 | 504.5806 |
| 507.6305  | 518.9666 | 540.8392 |

#### TS3

Zero-point correction= 0.352861

Thermal correction to Energy= 0.373584

Thermal correction to Enthalpy= 0.374528

Thermal correction to Gibbs Free Energy= 0.301198

Sum of electronic and zero-point Energies= -1153.863206

Sum of electronic and thermal Energies= -1153.842483

Sum of electronic and thermal Enthalpies= -1153.841539

Sum of electronic and thermal Free Energies= -1153.914868

#### Cartesian coordinates

|   |          |          |           |
|---|----------|----------|-----------|
| C | 1.892541 | 3.447638 | -0.157312 |
| C | 1.478717 | 2.144445 | 0.114977  |
| C | 2.396430 | 1.077792 | 0.095253  |
| C | 3.740149 | 1.361709 | -0.209028 |
| C | 4.152275 | 2.665437 | -0.482138 |
| C | 3.230393 | 3.714439 | -0.456965 |
| H | 1.166243 | 4.255302 | -0.143062 |
| H | 0.432769 | 1.936836 | 0.320419  |

|   |           |           |           |
|---|-----------|-----------|-----------|
| H | 4.464813  | 0.552939  | -0.211358 |
| H | 5.196122  | 2.862855  | -0.709118 |
| H | 3.551492  | 4.729673  | -0.670415 |
| C | 1.957822  | -0.298079 | 0.410355  |
| C | 2.162548  | -1.421125 | -0.438333 |
| C | 1.555438  | -2.587186 | 0.031318  |
| P | 0.941195  | -0.658792 | 1.790353  |
| C | 2.843108  | -1.354066 | -1.782534 |
| H | 2.261127  | -1.893139 | -2.537888 |
| H | 2.967552  | -0.325475 | -2.123877 |
| H | 3.835349  | -1.820456 | -1.753505 |
| C | 1.662471  | -3.929888 | -0.632291 |
| H | 2.632264  | -4.399002 | -0.415289 |
| H | 0.883568  | -4.609056 | -0.274251 |
| H | 1.577792  | -3.856585 | -1.720492 |
| C | 1.140296  | -2.476942 | 1.464235  |
| H | 1.974052  | -2.809671 | 2.105243  |
| H | 0.262928  | -3.068773 | 1.732639  |
| C | -1.046347 | -0.870984 | 0.321020  |
| C | -0.776835 | -1.846819 | -0.580849 |
| H | -0.409977 | -1.612586 | -1.575562 |
| H | -1.070996 | -2.878259 | -0.405887 |
| C | -1.903366 | 0.041878  | 0.776093  |
| H | -1.625965 | 0.674413  | 1.615773  |
| C | -3.256128 | 0.289195  | 0.235469  |
| C | -4.033191 | 1.310024  | 0.811585  |
| C | -3.807619 | -0.441663 | -0.831957 |
| C | -5.313326 | 1.594897  | 0.338076  |
| H | -3.623923 | 1.884993  | 1.638626  |
| C | -5.085674 | -0.156972 | -1.305301 |
| H | -3.223411 | -1.235776 | -1.286357 |
| C | -5.846335 | 0.862424  | -0.723915 |
| H | -5.894033 | 2.388873  | 0.799047  |
| H | -5.492649 | -0.733377 | -2.131507 |
| H | -6.843243 | 1.081229  | -1.095019 |

Vibrational frequencies

|           |          |          |
|-----------|----------|----------|
| -290.8163 | 14.2095  | 25.7475  |
| 41.9642   | 54.2181  | 75.7250  |
| 78.2759   | 90.8665  | 101.1702 |
| 111.3034  | 133.2383 | 143.1609 |
| 187.0879  | 219.9891 | 247.8966 |
| 251.8203  | 274.9917 | 286.2032 |
| 330.2195  | 332.3013 | 360.4885 |

|          |          |          |
|----------|----------|----------|
| 390.5810 | 414.3868 | 418.2680 |
| 424.8265 | 470.3177 | 493.5696 |
| 500.3699 | 520.1001 | 532.3293 |

#### TS4

Zero-point correction= 0.353543

Thermal correction to Energy= 0.373828

Thermal correction to Enthalpy= 0.374772

Thermal correction to Gibbs Free Energy= 0.304014

Sum of electronic and zero-point Energies= -1153.860833

Sum of electronic and thermal Energies= -1153.840548

Sum of electronic and thermal Enthalpies= -1153.839604

Sum of electronic and thermal Free Energies= -1153.910362

#### Cartesian coordinates

|   |           |           |           |
|---|-----------|-----------|-----------|
| P | 0.077887  | -0.508883 | -1.317674 |
| C | -1.078178 | 1.109682  | 1.265946  |
| C | -1.327247 | -0.205155 | 0.973379  |
| H | -0.646403 | -0.956466 | 1.362399  |
| C | -0.038155 | 2.064706  | -0.555684 |
| C | 1.241574  | 1.597024  | -0.195170 |
| C | 1.464779  | 0.243709  | -0.554025 |
| C | -0.707501 | 1.156074  | -1.543257 |
| H | -0.443258 | 1.490403  | -2.559440 |
| H | -1.797113 | 1.134416  | -1.479309 |
| C | -1.205986 | 2.077812  | 2.151945  |
| H | -1.693702 | 1.876383  | 3.106125  |
| H | -0.864337 | 3.095256  | 1.997300  |
| C | -2.637430 | -0.687346 | 0.501877  |
| C | -3.697884 | 0.192785  | 0.216132  |
| H | -3.549705 | 1.260206  | 0.350253  |
| C | -4.931996 | -0.291778 | -0.214051 |
| H | -5.736273 | 0.406526  | -0.428467 |
| C | -5.139752 | -1.664808 | -0.364057 |
| H | -6.101669 | -2.041063 | -0.698956 |
| C | -4.096116 | -2.550344 | -0.078369 |
| H | -4.244687 | -3.620575 | -0.191115 |
| C | -2.860407 | -2.068059 | 0.343824  |
| H | -2.048707 | -2.761438 | 0.548057  |
| C | -0.428237 | 3.517848  | -0.532013 |
| H | 0.021508  | 4.062938  | 0.301393  |
| H | -1.513566 | 3.635140  | -0.475872 |
| H | -0.086813 | 4.008172  | -1.453203 |
| C | 2.193409  | 2.434260  | 0.620143  |

|   |          |           |           |
|---|----------|-----------|-----------|
| H | 2.667902 | 3.212284  | 0.009747  |
| H | 2.984250 | 1.830599  | 1.067018  |
| H | 1.657704 | 2.938904  | 1.430224  |
| C | 2.681960 | -0.523547 | -0.207503 |
| C | 3.962600 | -0.034764 | -0.524307 |
| H | 4.054076 | 0.921187  | -1.031018 |
| C | 5.107139 | -0.769782 | -0.218408 |
| H | 6.085023 | -0.373614 | -0.476914 |
| C | 4.998465 | -2.012828 | 0.409006  |
| H | 5.889867 | -2.585387 | 0.647369  |
| C | 3.734172 | -2.514501 | 0.725216  |
| H | 3.637849 | -3.479340 | 1.214852  |
| C | 2.589578 | -1.779010 | 0.420259  |
| H | 1.611025 | -2.173146 | 0.679365  |

#### Vibrational frequencies

|           |          |          |
|-----------|----------|----------|
| -381.0863 | 26.3838  | 40.8727  |
| 47.1448   | 58.1582  | 64.9208  |
| 95.6622   | 104.7744 | 130.1700 |
| 140.6481  | 150.2811 | 178.5320 |
| 196.5700  | 209.4728 | 260.2450 |
| 276.0288  | 279.0411 | 285.2150 |
| 335.2232  | 340.0552 | 381.8108 |
| 410.8629  | 417.1986 | 421.9307 |
| 434.0126  | 463.1285 | 494.1762 |
| 511.9481  | 517.6131 | 539.3049 |

#### Int1

Zero-point correction= 0.359220

Thermal correction to Energy= 0.378139

Thermal correction to Enthalpy= 0.379083

Thermal correction to Gibbs Free Energy= 0.312592

Sum of electronic and zero-point Energies= -1153.928989

Sum of electronic and thermal Energies= -1153.910070

Sum of electronic and thermal Enthalpies= -1153.909126

Sum of electronic and thermal Free Energies= -1153.975617

#### Cartesian coordinates

|   |          |           |           |
|---|----------|-----------|-----------|
| C | 3.360373 | 2.384988  | -0.134003 |
| C | 2.240688 | 1.563558  | -0.263629 |
| C | 2.361978 | 0.161516  | -0.222559 |
| C | 3.642945 | -0.384630 | -0.020238 |
| C | 4.761969 | 0.436012  | 0.106828  |
| C | 4.626438 | 1.825426  | 0.047775  |

|   |           |           |           |
|---|-----------|-----------|-----------|
| H | 3.241190  | 3.464317  | -0.166183 |
| H | 1.257847  | 2.007392  | -0.380364 |
| H | 3.756901  | -1.463567 | 0.030187  |
| H | 5.741665  | -0.009451 | 0.254197  |
| H | 5.498042  | 2.465028  | 0.150797  |
| C | 1.183914  | -0.717634 | -0.347940 |
| C | 0.129088  | -0.588708 | -1.188599 |
| C | -0.996538 | -1.579939 | -0.868143 |
| P | 0.888475  | -2.143962 | 0.834444  |
| C | -0.032201 | 0.418933  | -2.289147 |
| H | -0.807949 | 1.150755  | -2.033136 |
| H | 0.896533  | 0.957992  | -2.482938 |
| H | -0.348926 | -0.067356 | -3.218108 |
| C | -2.021404 | -1.798656 | -1.977595 |
| H | -2.761940 | -2.542250 | -1.664702 |
| H | -2.555913 | -0.877237 | -2.226058 |
| H | -1.537602 | -2.168686 | -2.887042 |
| C | -0.253208 | -2.870258 | -0.457635 |
| H | 0.308299  | -3.299950 | -1.292394 |
| H | -0.923058 | -3.630548 | -0.041235 |
| C | -0.611980 | -1.321634 | 1.579557  |
| C | -0.728702 | -0.977244 | 2.863184  |
| H | -1.610699 | -0.459658 | 3.235093  |
| H | 0.055484  | -1.188712 | 3.584546  |
| C | -1.670728 | -1.106402 | 0.496923  |
| H | -2.487789 | -1.816583 | 0.684939  |
| C | -2.269557 | 0.285240  | 0.431937  |
| C | -3.598748 | 0.455414  | 0.020500  |
| C | -1.512761 | 1.430706  | 0.722474  |
| C | -4.152150 | 1.729475  | -0.121250 |
| H | -4.205746 | -0.420818 | -0.192261 |
| C | -2.060777 | 2.705199  | 0.578091  |
| H | -0.492807 | 1.317266  | 1.071646  |
| C | -3.382026 | 2.860916  | 0.151299  |
| H | -5.184849 | 1.836074  | -0.440916 |
| H | -1.456017 | 3.578315  | 0.806894  |
| H | -3.809474 | 3.853442  | 0.043386  |

Vibrational frequencies

|          |          |          |
|----------|----------|----------|
| 29.7284  | 44.5763  | 60.8139  |
| 82.0120  | 89.8330  | 108.9236 |
| 139.8977 | 176.8846 | 194.2802 |
| 213.9814 | 248.3966 | 255.9304 |
| 274.8422 | 288.4170 | 298.2034 |



|          |          |          |
|----------|----------|----------|
| 315.7837 | 333.1281 | 343.3403 |
| 376.2498 | 420.0165 | 424.4112 |
| 427.1538 | 448.4441 | 482.6653 |
| 498.3559 | 515.0167 | 518.9103 |
| 563.0629 | 585.2611 | 616.8169 |

## Int2

Zero-point correction= 0.359131

Thermal correction to Energy= 0.378202

Thermal correction to Enthalpy= 0.379146

Thermal correction to Gibbs Free Energy= 0.310677

Sum of electronic and zero-point Energies= -1153.931496

Sum of electronic and thermal Energies= -1153.912425

Sum of electronic and thermal Enthalpies= -1153.911481

Sum of electronic and thermal Free Energies= -1153.979949

## Cartesian coordinates

|   |           |           |           |
|---|-----------|-----------|-----------|
| C | 3.555765  | -2.646727 | 0.955809  |
| C | 2.597399  | -1.640317 | 0.834510  |
| C | 2.840967  | -0.501414 | 0.045452  |
| C | 4.066729  | -0.418684 | -0.639407 |
| C | 5.025398  | -1.422849 | -0.516563 |
| C | 4.775320  | -2.540121 | 0.284503  |
| H | 3.345131  | -3.519039 | 1.568048  |
| H | 1.639953  | -1.741119 | 1.336082  |
| H | 4.265860  | 0.445937  | -1.266143 |
| H | 5.968662  | -1.334521 | -1.048000 |
| H | 5.521067  | -3.324162 | 0.377198  |
| C | 1.826767  | 0.561890  | -0.098699 |
| C | 1.099779  | 1.153824  | 0.877567  |
| C | -0.010385 | 2.067001  | 0.318261  |
| P | 1.223968  | 1.127039  | -1.773354 |
| C | 1.203279  | 0.920712  | 2.355723  |
| H | 0.294024  | 0.435111  | 2.732893  |
| H | 2.056258  | 0.288688  | 2.607013  |
| H | 1.303321  | 1.868445  | 2.896321  |
| C | -0.552767 | 3.110768  | 1.290325  |
| H | 0.239366  | 3.809954  | 1.575316  |
| H | -1.360731 | 3.678703  | 0.820151  |
| H | -0.944967 | 2.665902  | 2.209354  |
| C | 0.614421  | 2.692062  | -0.950003 |
| H | 1.440881  | 3.364984  | -0.704571 |
| H | -0.121259 | 3.224899  | -1.561996 |
| C | -1.045122 | 1.052118  | -0.225383 |

|   |           |           |           |
|---|-----------|-----------|-----------|
| C | -0.526610 | 0.425730  | -1.508814 |
| H | -1.139127 | 0.713164  | -2.371488 |
| H | -0.502350 | -0.667406 | -1.471645 |
| C | -2.184285 | 0.756081  | 0.428388  |
| H | -2.371504 | 1.302065  | 1.351055  |
| C | -3.235794 | -0.226837 | 0.127372  |
| C | -4.167692 | -0.513466 | 1.147030  |
| C | -3.393421 | -0.900261 | -1.101018 |
| C | -5.191069 | -1.439063 | 0.962809  |
| H | -4.076826 | -0.000768 | 2.101451  |
| C | -4.420560 | -1.824628 | -1.286689 |
| H | -2.725963 | -0.693505 | -1.926016 |
| C | -5.322254 | -2.104432 | -0.258238 |
| H | -5.888043 | -1.639693 | 1.771557  |
| H | -4.518522 | -2.325706 | -2.245662 |
| H | -6.119939 | -2.825829 | -0.408223 |

#### Vibrational frequencies

|          |          |          |
|----------|----------|----------|
| 13.0224  | 32.3521  | 45.0621  |
| 73.1578  | 90.5185  | 102.6030 |
| 131.3707 | 151.6615 | 207.6245 |
| 216.6048 | 225.3503 | 253.9338 |
| 271.7632 | 287.8532 | 297.7161 |
| 302.7338 | 333.5400 | 351.5625 |
| 368.7987 | 417.4756 | 420.4597 |
| 427.5793 | 462.4312 | 498.9278 |
| 509.9339 | 532.3174 | 535.6321 |
| 565.8908 | 578.0459 | 616.8298 |

#### Int3

Zero-point correction= 0.359265

Thermal correction to Energy= 0.378415

Thermal correction to Enthalpy= 0.379359

Thermal correction to Gibbs Free Energy= 0.310411

Sum of electronic and zero-point Energies= -1153.932004

Sum of electronic and thermal Energies= -1153.912854

Sum of electronic and thermal Enthalpies= -1153.911909

Sum of electronic and thermal Free Energies= -1153.980858

#### Cartesian coordinates

|   |          |           |           |
|---|----------|-----------|-----------|
| C | 2.877443 | -3.172206 | -0.044436 |
| C | 2.099747 | -2.040141 | -0.279626 |
| C | 2.597451 | -0.752273 | -0.008371 |
| C | 3.909069 | -0.638270 | 0.486112  |

|   |           |           |           |
|---|-----------|-----------|-----------|
| C | 4.686917  | -1.772111 | 0.721849  |
| C | 4.174374  | -3.043999 | 0.459726  |
| H | 2.469925  | -4.157164 | -0.253848 |
| H | 1.088767  | -2.150177 | -0.661748 |
| H | 4.321770  | 0.349699  | 0.665835  |
| H | 5.698548  | -1.660153 | 1.101732  |
| H | 4.781120  | -3.926473 | 0.639862  |
| C | 1.768502  | 0.439954  | -0.261180 |
| C | 1.524491  | 1.472492  | 0.579388  |
| C | 0.502649  | 2.465379  | 0.012835  |
| P | 0.722196  | 0.627995  | -1.808755 |
| C | 1.987886  | 1.608706  | 1.999919  |
| H | 1.123677  | 1.737752  | 2.664649  |
| H | 2.548171  | 0.734115  | 2.333607  |
| H | 2.617802  | 2.496173  | 2.135302  |
| C | 0.511368  | 3.852266  | 0.652595  |
| H | 1.498172  | 4.318336  | 0.565275  |
| H | -0.215340 | 4.502374  | 0.154375  |
| H | 0.249189  | 3.812659  | 1.714803  |
| C | 0.783542  | 2.473661  | -1.506067 |
| H | 1.768679  | 2.885413  | -1.743336 |
| H | 0.016306  | 3.012210  | -2.073110 |
| C | -0.880505 | 0.590760  | -0.841193 |
| C | -0.896061 | 1.763947  | 0.120920  |
| H | -1.101175 | 1.454041  | 1.152488  |
| H | -1.675928 | 2.483797  | -0.163082 |
| C | -1.784615 | -0.392281 | -1.013774 |
| H | -1.544112 | -1.141143 | -1.768979 |
| C | -3.053436 | -0.654297 | -0.318884 |
| C | -3.667368 | -1.906597 | -0.526167 |
| C | -3.704662 | 0.257377  | 0.536430  |
| C | -4.862104 | -2.244704 | 0.103634  |
| H | -3.189333 | -2.623470 | -1.188936 |
| C | -4.902839 | -0.079922 | 1.163676  |
| H | -3.288465 | 1.241676  | 0.702931  |
| C | -5.486546 | -1.331538 | 0.956279  |
| H | -5.307316 | -3.219713 | -0.072466 |
| H | -5.385653 | 0.642568  | 1.815658  |
| H | -6.419549 | -1.589656 | 1.448303  |

Vibrational frequencies

|          |          |          |
|----------|----------|----------|
| 12.8510  | 27.5397  | 40.8458  |
| 69.8652  | 91.6148  | 101.4145 |
| 112.3161 | 165.0614 | 205.2123 |

|          |          |          |
|----------|----------|----------|
| 224.9537 | 230.9343 | 256.7641 |
| 266.8804 | 269.2383 | 286.5398 |
| 295.7734 | 313.9034 | 335.0139 |
| 374.3563 | 416.6140 | 419.2820 |
| 453.9184 | 467.3445 | 479.8445 |
| 508.0135 | 527.0735 | 537.7466 |
| 553.0309 | 573.6860 | 587.4285 |

#### Int4

Zero-point correction= 0.358555

Thermal correction to Energy= 0.377749

Thermal correction to Enthalpy= 0.378693

Thermal correction to Gibbs Free Energy= 0.310575

Sum of electronic and zero-point Energies= -1153.926638

Sum of electronic and thermal Energies= -1153.907444

Sum of electronic and thermal Enthalpies= -1153.906500

Sum of electronic and thermal Free Energies= -1153.974618

#### Cartesian coordinates

|   |           |           |           |
|---|-----------|-----------|-----------|
| P | -0.084144 | -0.368805 | -1.142348 |
| C | -1.042141 | 1.365332  | 0.771882  |
| C | -1.143040 | -0.129232 | 0.464708  |
| H | -0.636197 | -0.706844 | 1.244657  |
| C | -0.149862 | 2.080958  | -0.258170 |
| C | 1.267911  | 1.570626  | 0.064281  |
| C | 1.478202  | 0.301906  | -0.362152 |
| C | -0.508689 | 1.393068  | -1.595562 |
| H | 0.113879  | 1.751920  | -2.419854 |
| H | -1.564365 | 1.508402  | -1.860572 |
| C | -1.642534 | 1.952530  | 1.808417  |
| H | -2.256417 | 1.379968  | 2.497582  |
| H | -1.563185 | 3.018607  | 1.995497  |
| C | -2.540000 | -0.682888 | 0.281224  |
| C | -3.602996 | 0.096011  | -0.198973 |
| H | -3.449928 | 1.154985  | -0.378199 |
| C | -4.861681 | -0.466716 | -0.417112 |
| H | -5.670726 | 0.157064  | -0.786829 |
| C | -5.084797 | -1.819600 | -0.157050 |
| H | -6.065442 | -2.255667 | -0.323004 |
| C | -4.035897 | -2.605933 | 0.325600  |
| H | -4.196735 | -3.659075 | 0.538108  |
| C | -2.779157 | -2.041825 | 0.539130  |
| H | -1.966683 | -2.662032 | 0.910147  |
| C | -0.298281 | 3.599524  | -0.299792 |

|   |           |           |           |
|---|-----------|-----------|-----------|
| H | -0.037618 | 4.069335  | 0.652976  |
| H | -1.332155 | 3.869830  | -0.534147 |
| H | 0.352147  | 4.024536  | -1.070279 |
| C | 2.156495  | 2.396571  | 0.946202  |
| H | 2.512802  | 3.297465  | 0.432454  |
| H | 3.022966  | 1.834507  | 1.297477  |
| H | 1.586795  | 2.735297  | 1.820549  |
| C | 2.680066  | -0.526027 | -0.157861 |
| C | 3.971123  | -0.005987 | -0.365739 |
| H | 4.079895  | 1.018052  | -0.708604 |
| C | 5.103578  | -0.795142 | -0.166569 |
| H | 6.089524  | -0.371719 | -0.336122 |
| C | 4.972735  | -2.126004 | 0.234899  |
| H | 5.854370  | -2.741516 | 0.386823  |
| C | 3.697446  | -2.663172 | 0.426768  |
| H | 3.583473  | -3.699542 | 0.731507  |
| C | 2.565818  | -1.874961 | 0.226842  |
| H | 1.579975  | -2.305740 | 0.379219  |

Vibrational frequencies

|          |          |          |
|----------|----------|----------|
| 23.8329  | 39.3535  | 48.3536  |
| 59.2607  | 70.1064  | 102.3191 |
| 125.3865 | 154.7946 | 199.0914 |
| 230.7223 | 238.7384 | 247.4182 |
| 263.5747 | 270.9244 | 290.0218 |
| 317.5016 | 327.5022 | 349.0841 |
| 382.1026 | 398.3211 | 416.9156 |
| 420.7122 | 451.1714 | 491.6484 |
| 510.3031 | 524.1126 | 541.4747 |
| 543.7639 | 579.7945 | 620.4590 |

# NMR spectrums

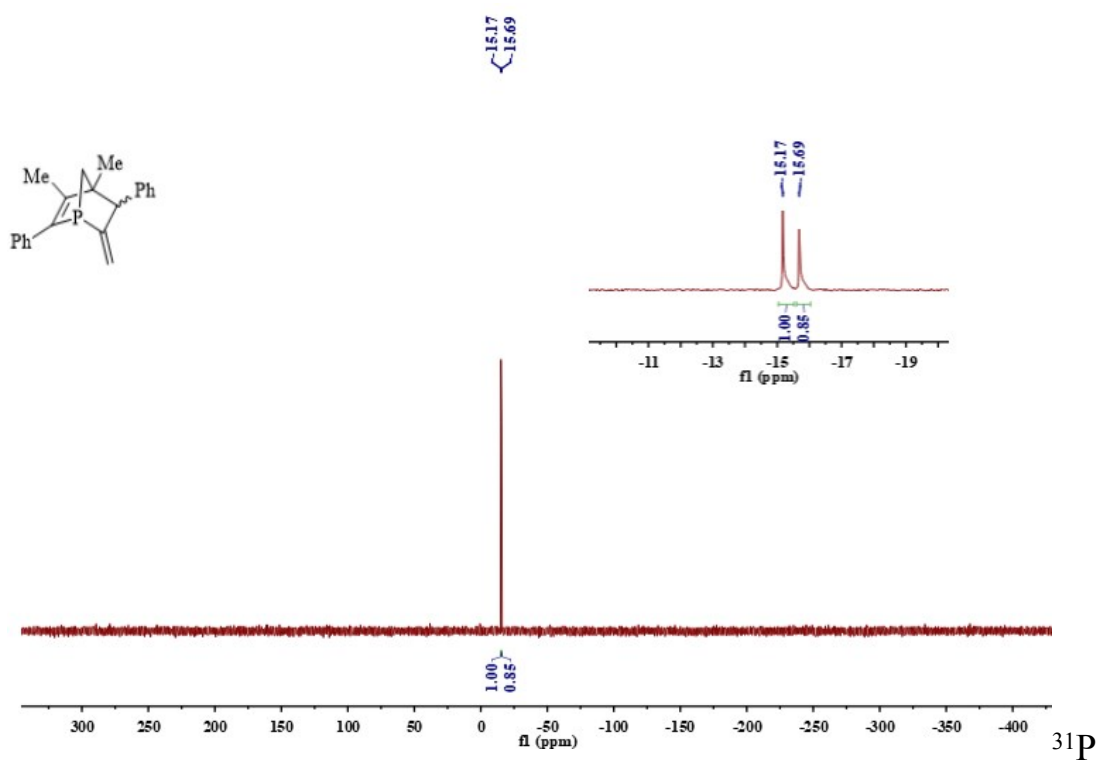

(CDCl<sub>3</sub>, 121 MHz) NMR of **3aa**

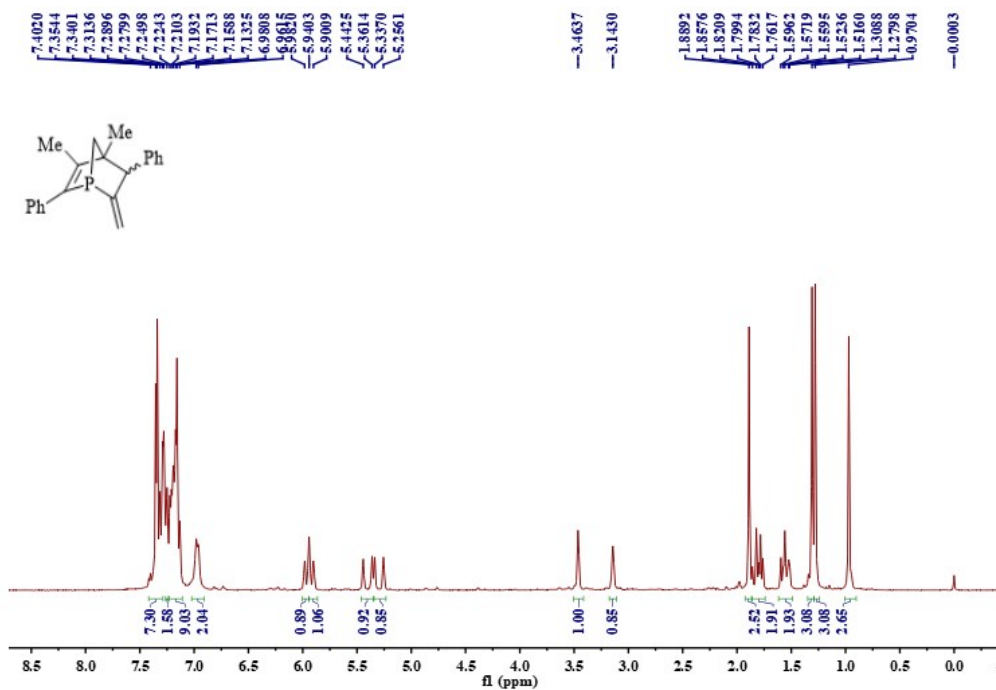

$^1\text{H}$  (CDCl<sub>3</sub>, 300 MHz) NMR of **3aa**

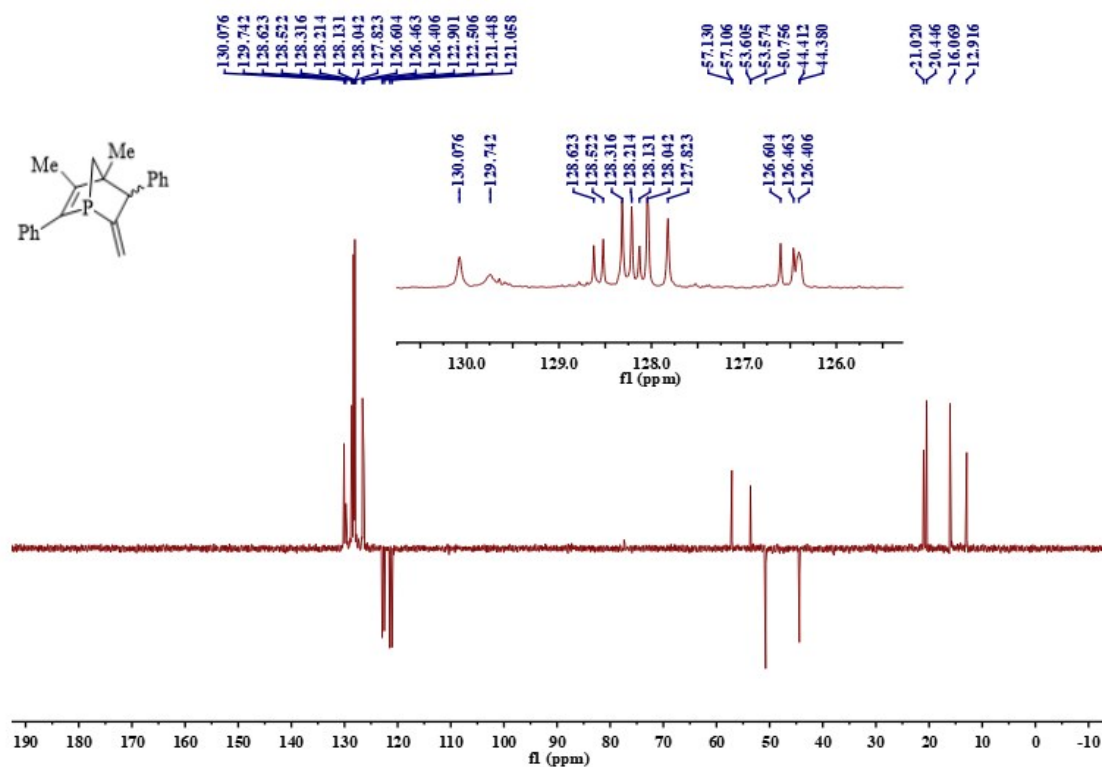

Dept135 (CDCl<sub>3</sub>, 75 MHz) NMR of **3aa**

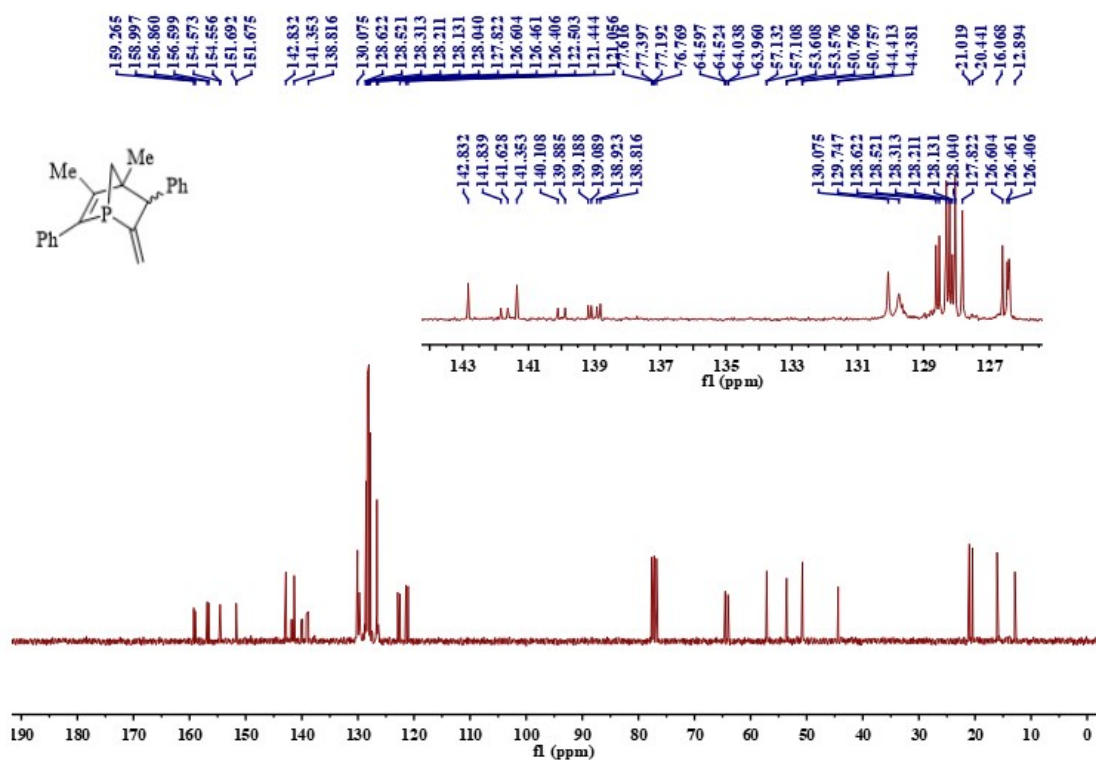

<sup>13</sup>C {<sup>1</sup>H} (CDCl<sub>3</sub>, 75 MHz) NMR of **3aa**

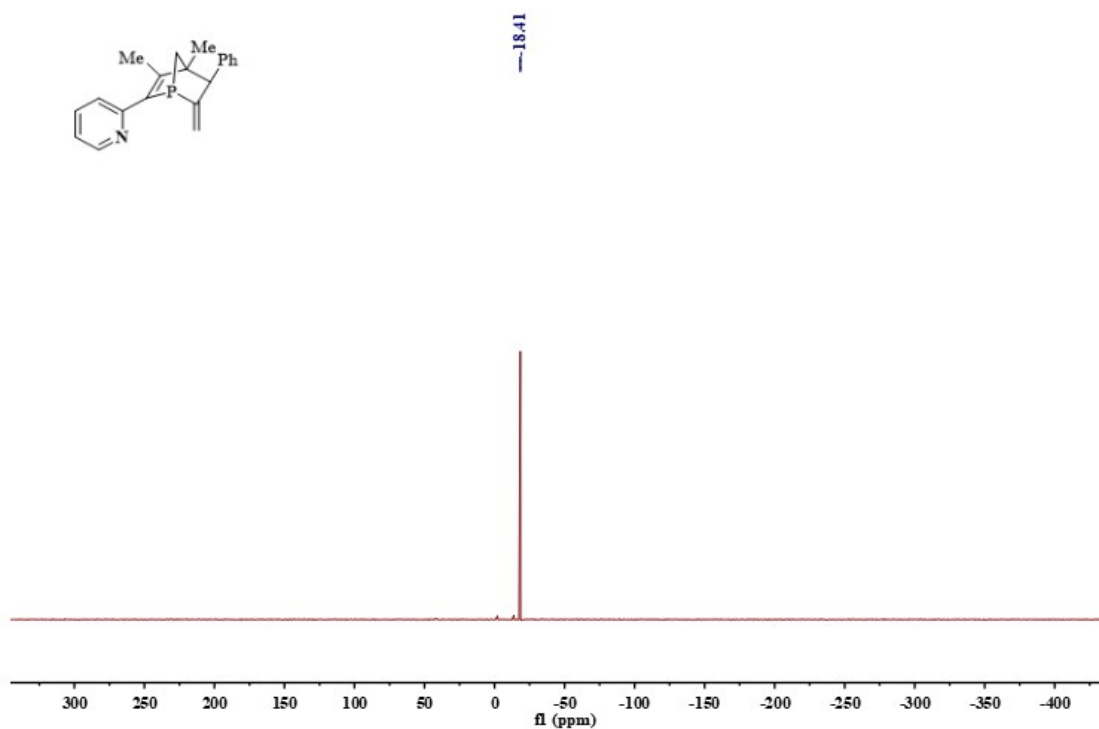

$^{31}\text{P}$  (CDCl<sub>3</sub>, 121 MHz) NMR of *exo*-3ba

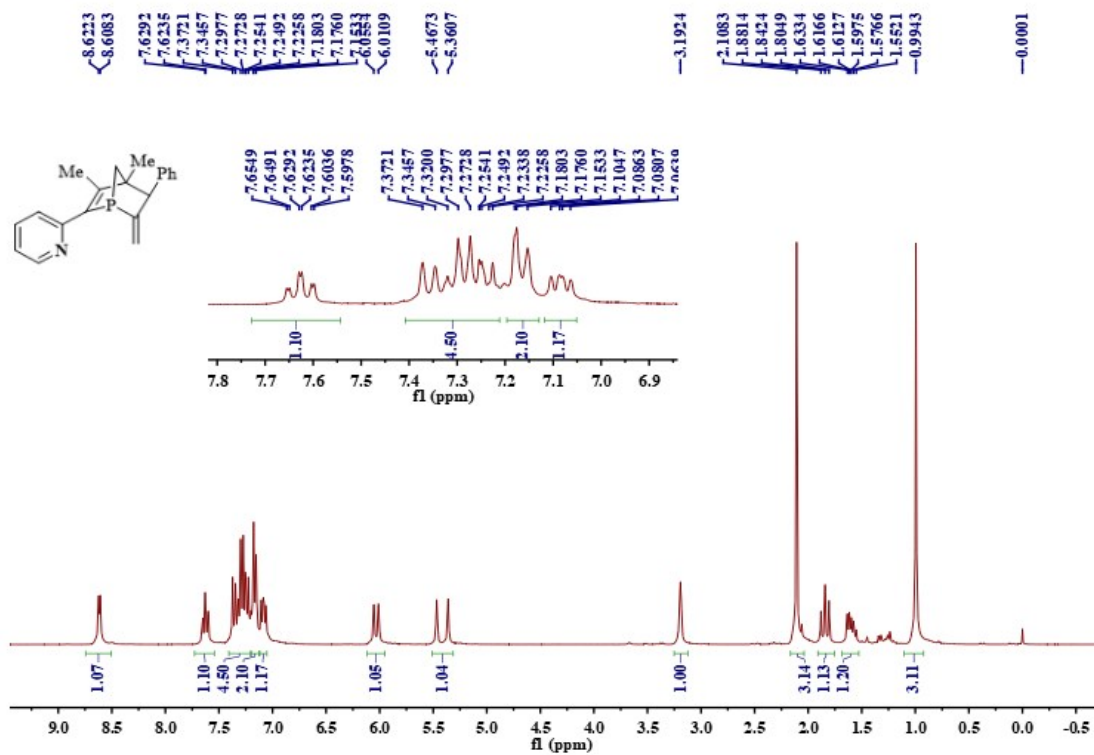

$^1\text{H}$  (CDCl<sub>3</sub>, 300 MHz) NMR of *exo*-3ba



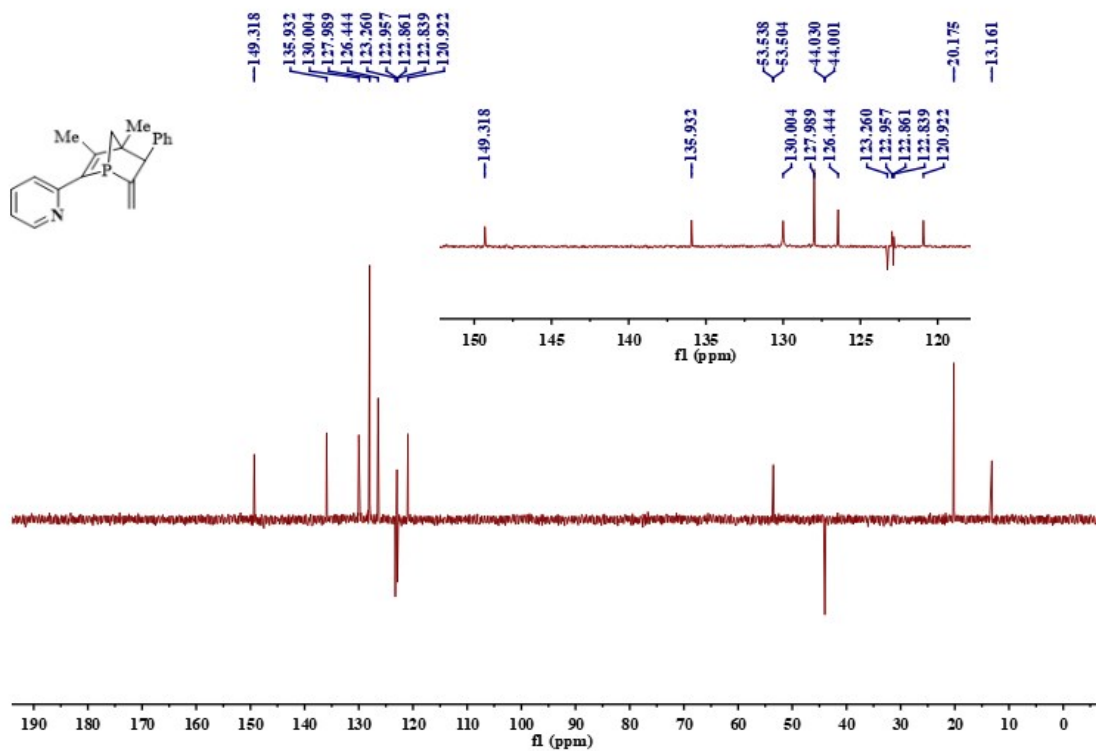

Dept135 (CDCl<sub>3</sub>, 75 MHz) NMR of *exo-3ba*

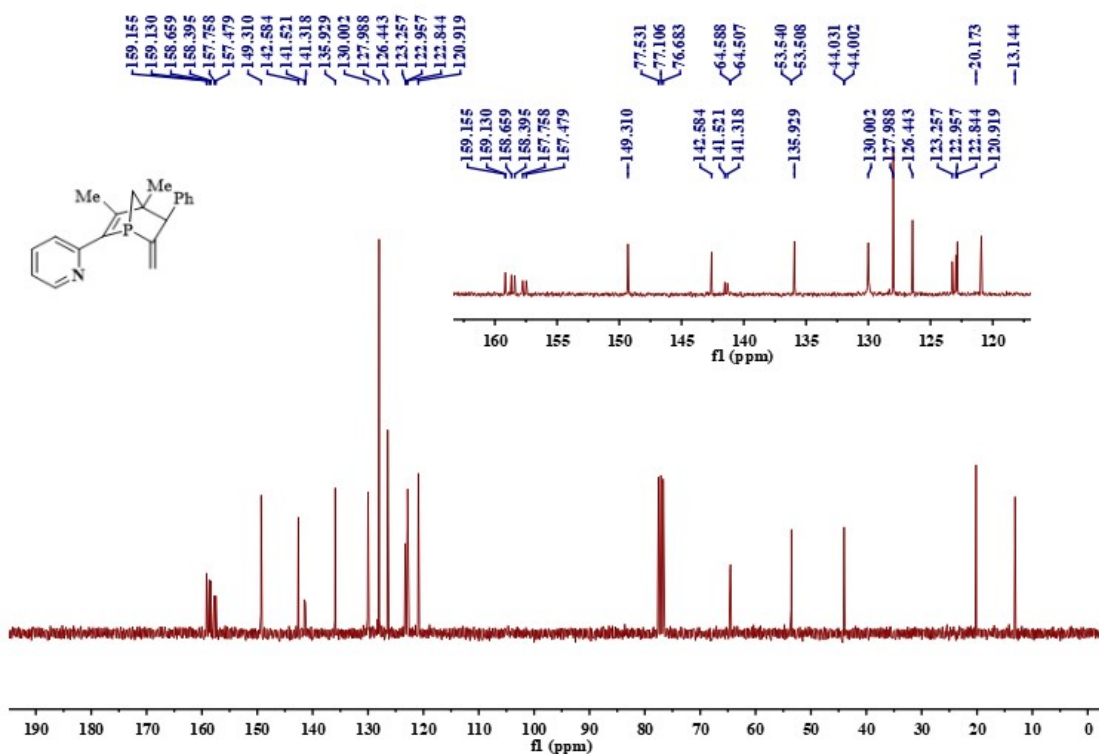

<sup>13</sup>C {<sup>1</sup>H} (CDCl<sub>3</sub>, 75 MHz) NMR of *exo-3ba*

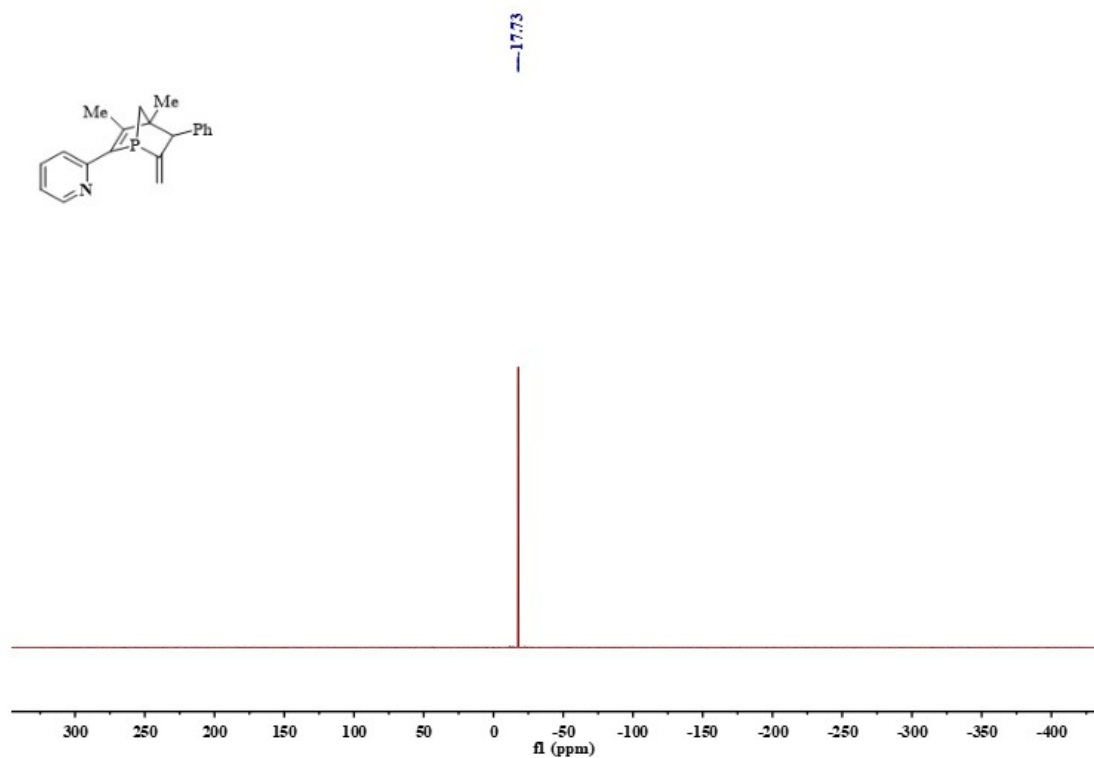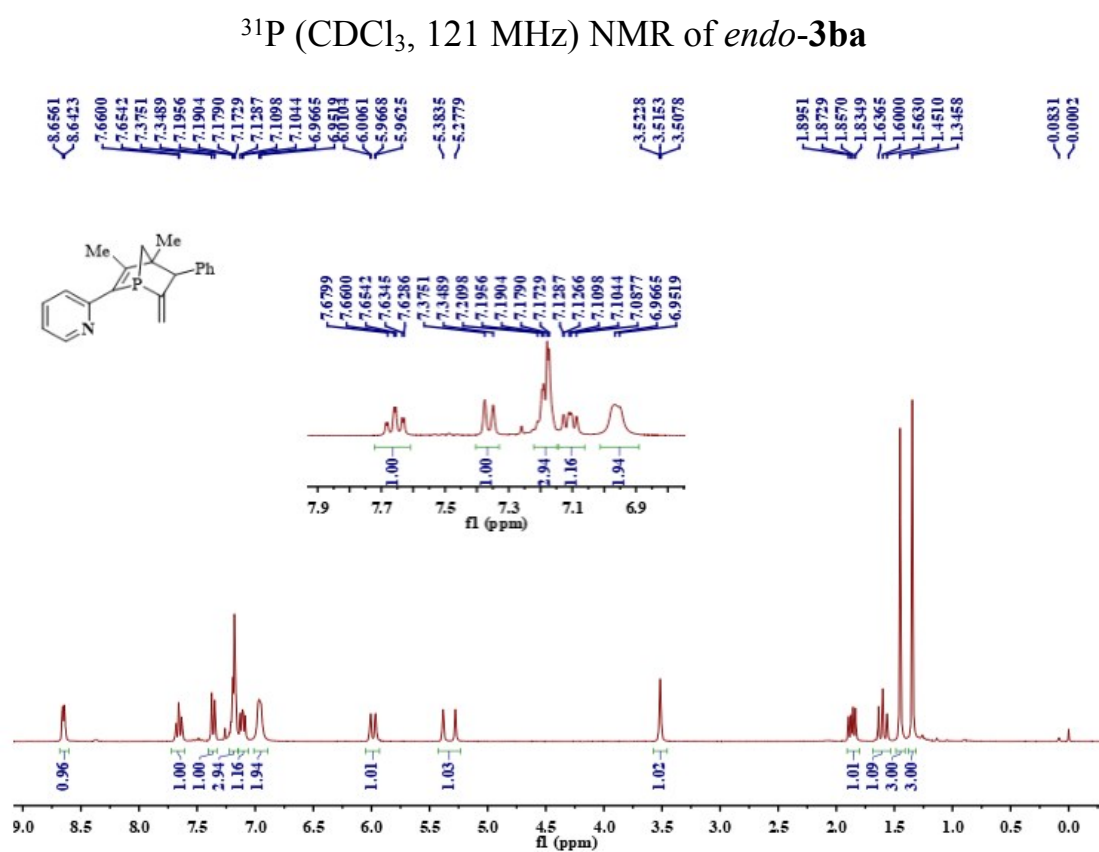

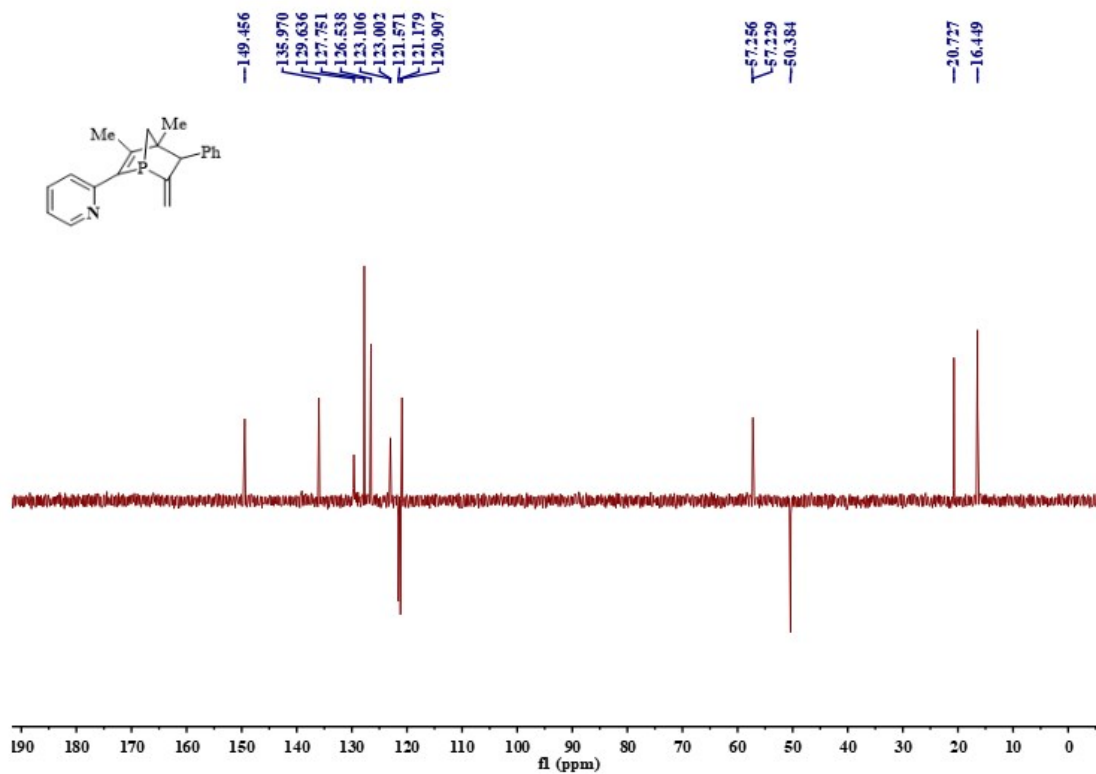

Dept135 (CDCl<sub>3</sub>, 75 MHz) NMR of *endo-3ba*

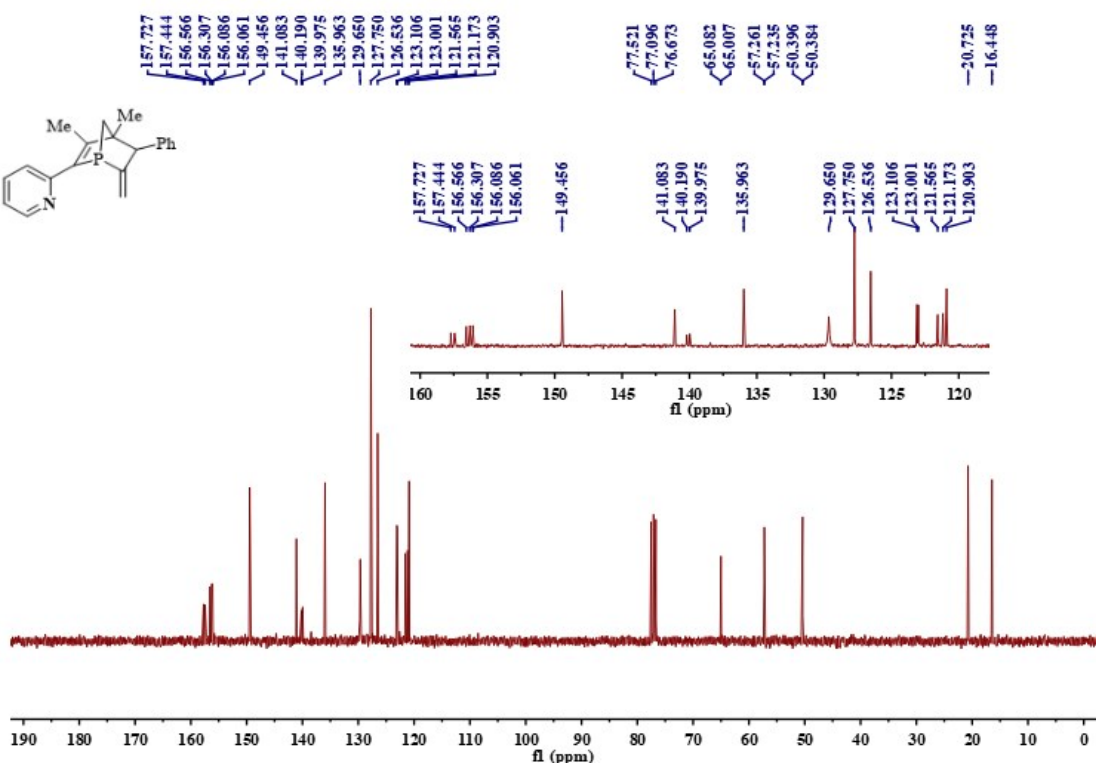

<sup>13</sup>C{<sup>1</sup>H} (CDCl<sub>3</sub>, 75 MHz) NMR of *endo-3ba*

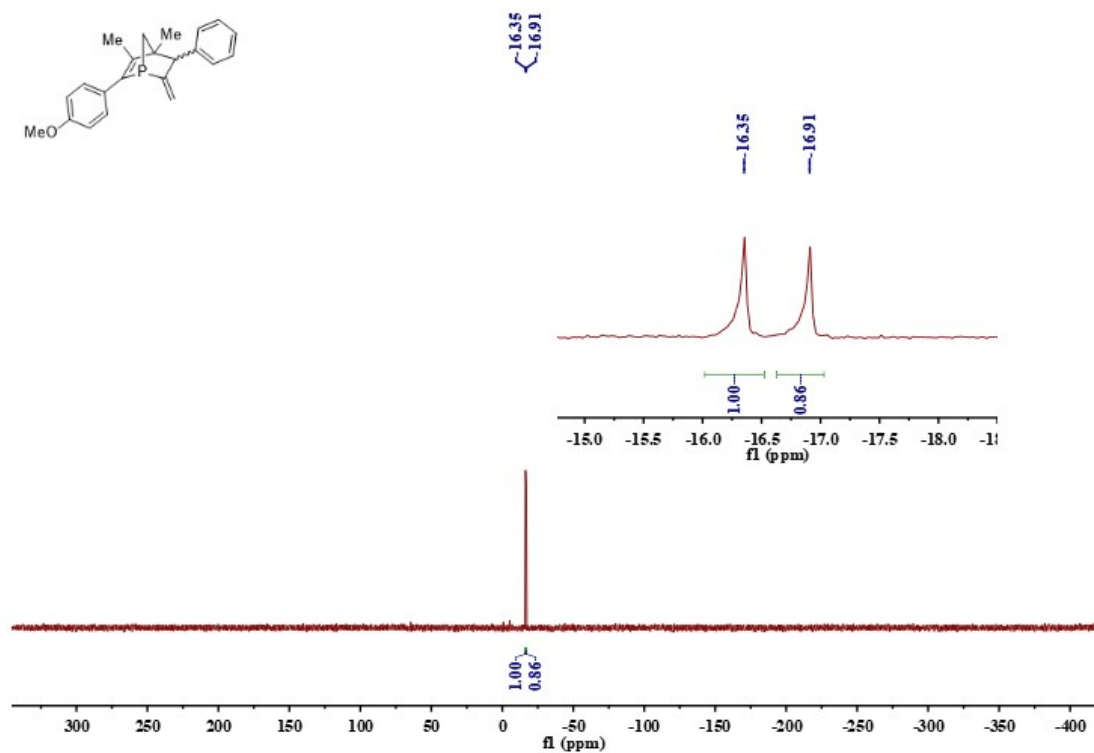

$^{31}\text{P}$  (CDCl<sub>3</sub>, 121 MHz) NMR of **3ca**

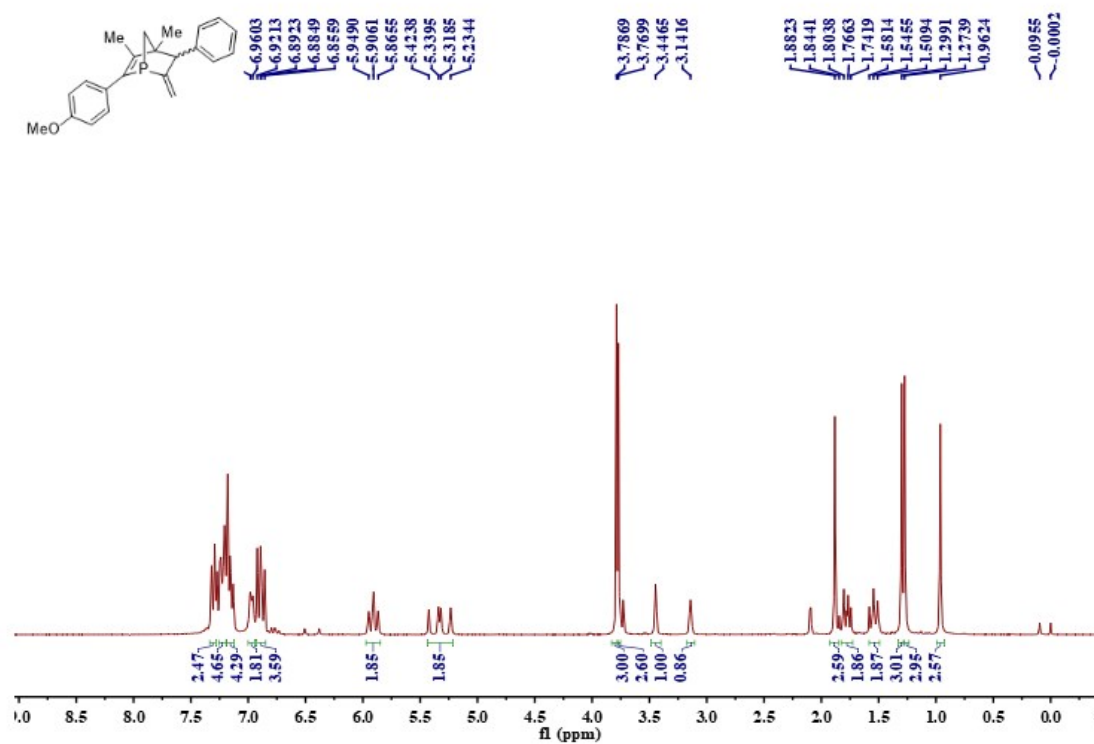

$^1\text{H}$  (CDCl<sub>3</sub>, 300 MHz) NMR of **3ca**

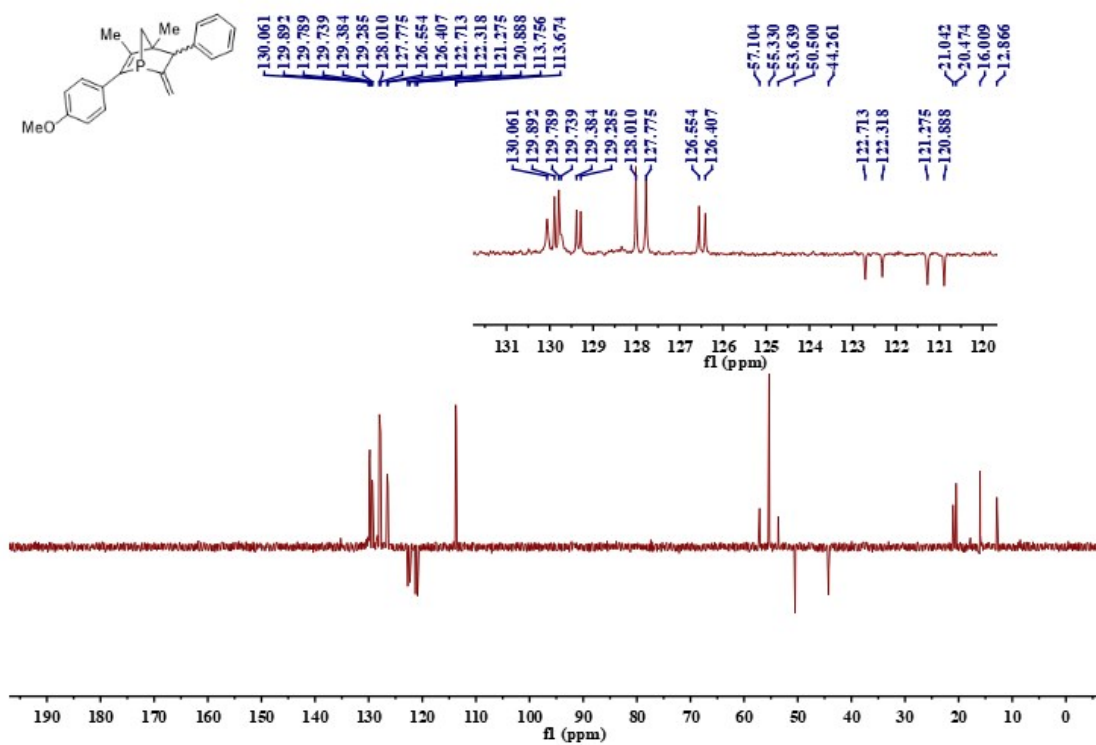

Dept135 (CDCl<sub>3</sub>, 75 MHz) NMR of **3ca**

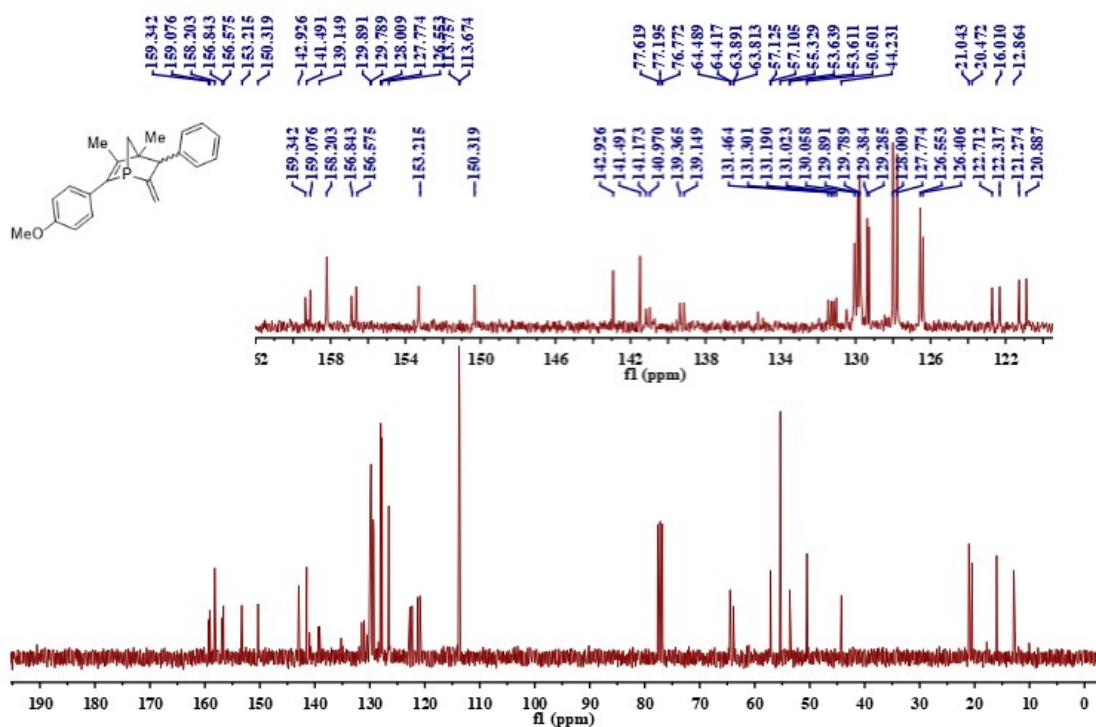

<sup>13</sup>C {<sup>1</sup>H} (CDCl<sub>3</sub>, 75 MHz) NMR of **3ca**

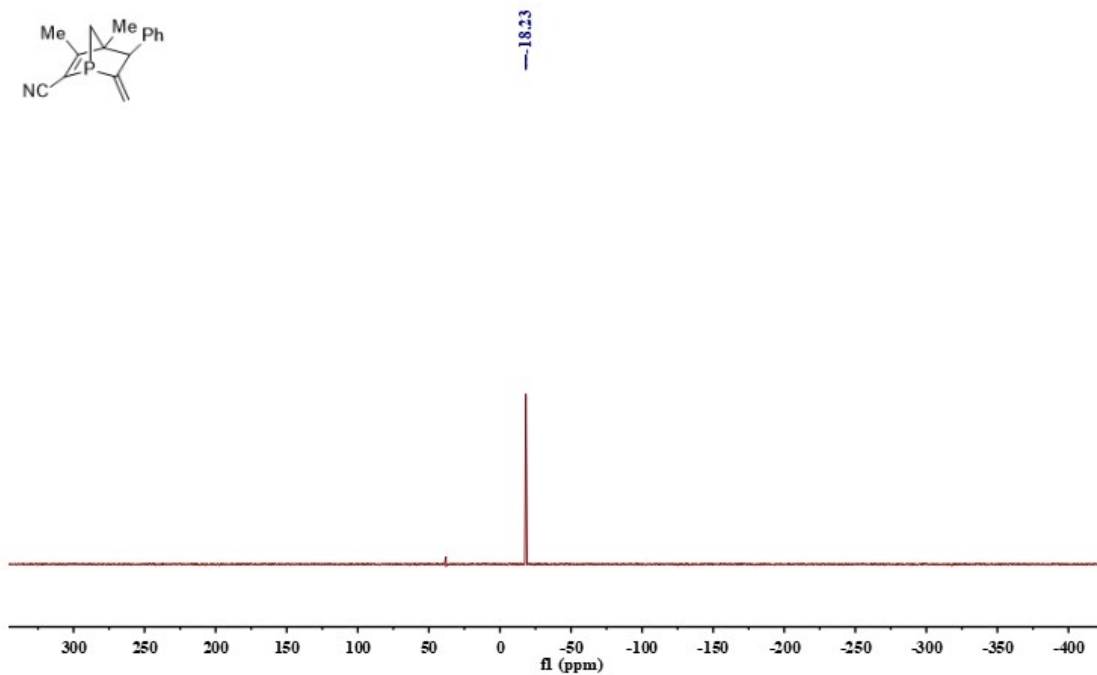

$^{31}\text{P}$  ( $\text{CDCl}_3$ , 121 MHz) NMR of *exo-3da*

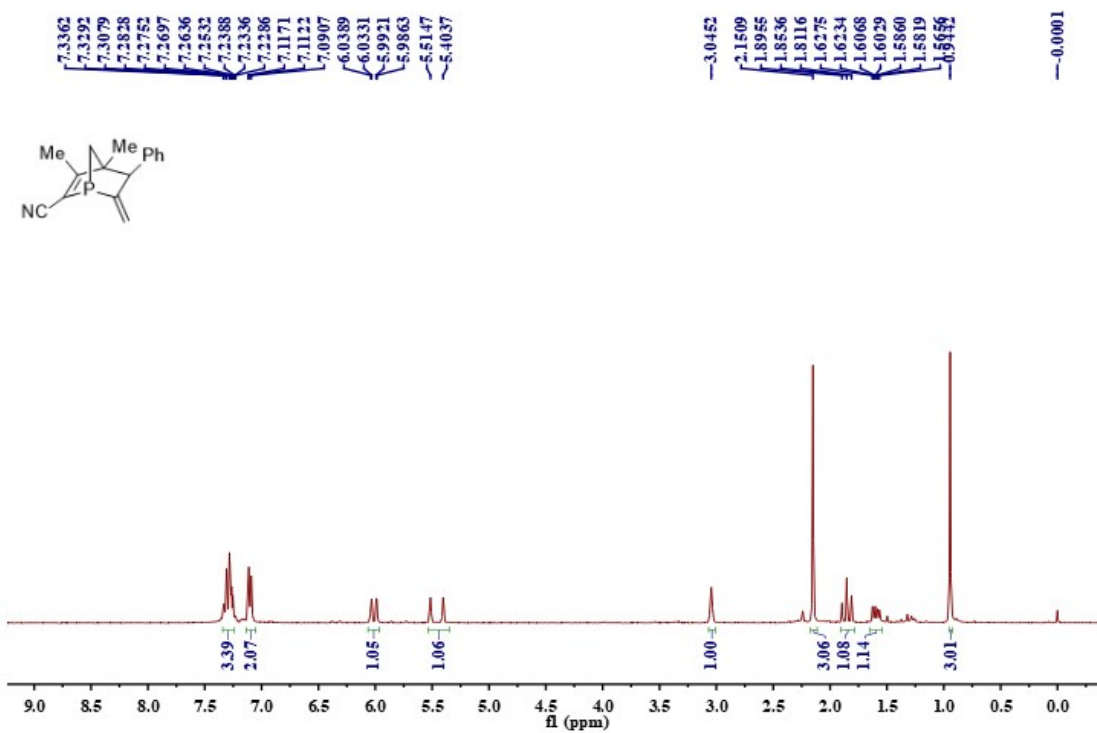

$^1\text{H}$  ( $\text{CDCl}_3$ , 300 MHz) NMR of *exo-3da*

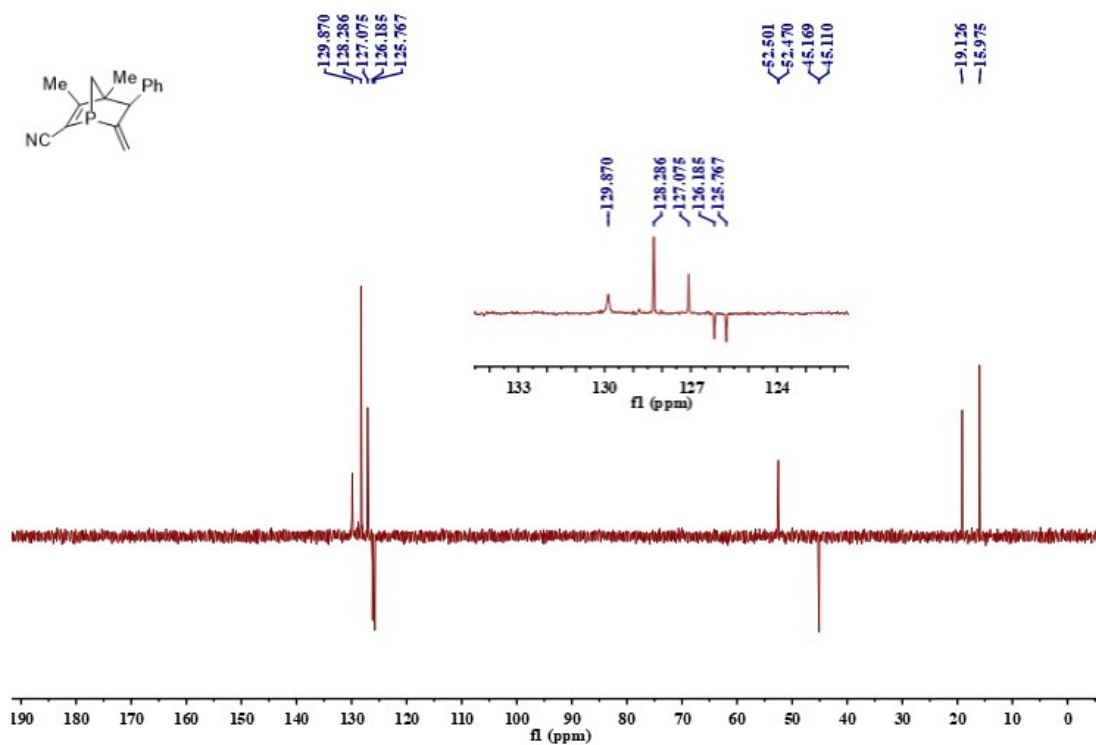

Dept135 (CDCl<sub>3</sub>, 75 MHz) NMR of *exo*-**3da**

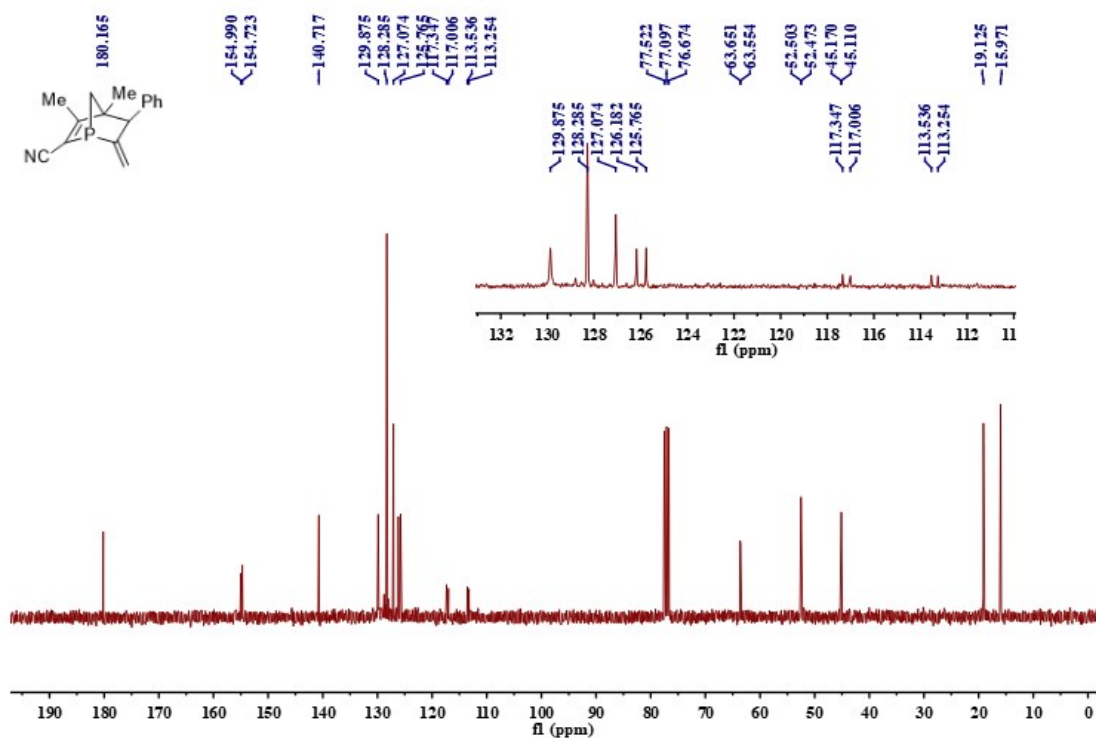

$^{13}\text{C}$  { $^1\text{H}$ } (CDCl<sub>3</sub>, 75 MHz) NMR of *exo*-**3da**

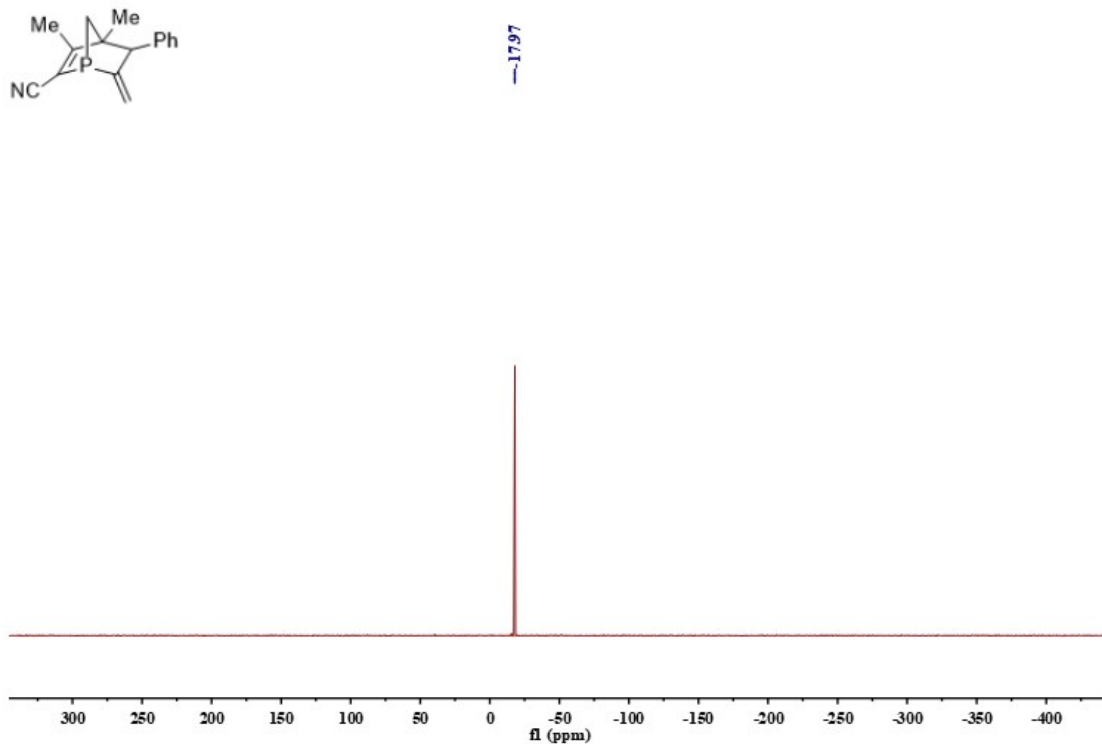

$^{31}\text{P}$  ( $\text{CDCl}_3$ , 121 MHz) NMR of *endo-3da*

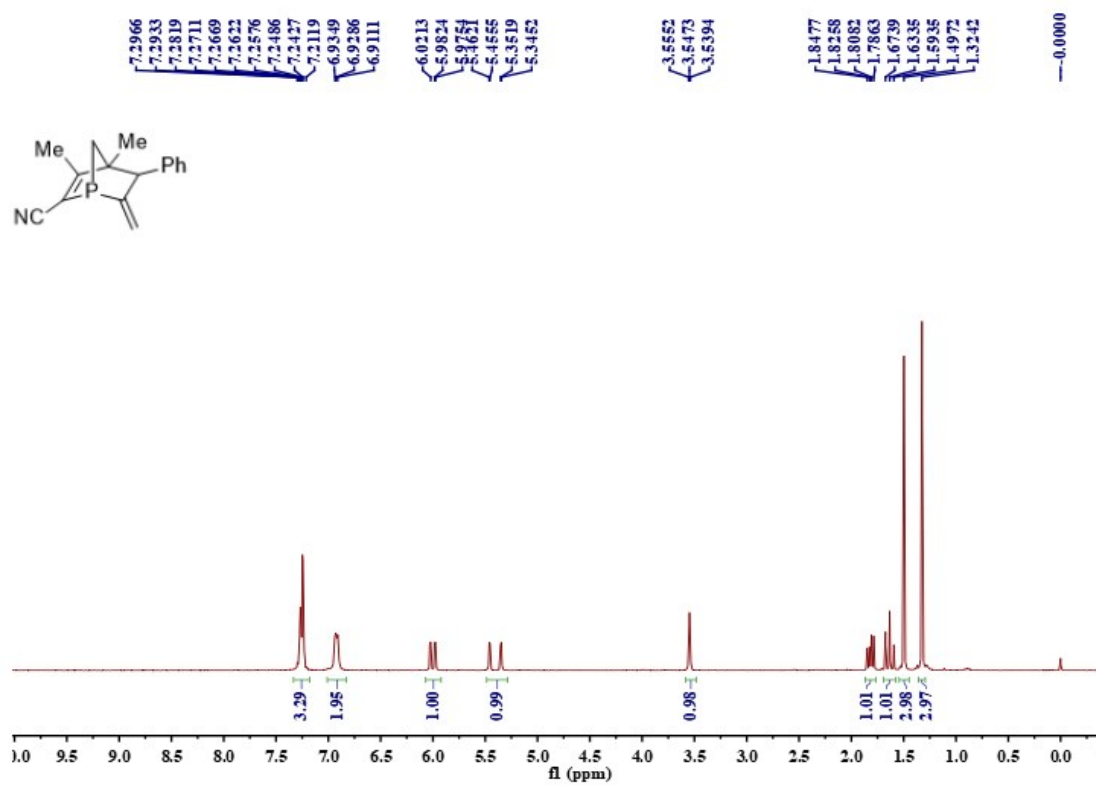

$^1\text{H}$  ( $\text{CDCl}_3$ , 300 MHz) NMR of *endo-3da*



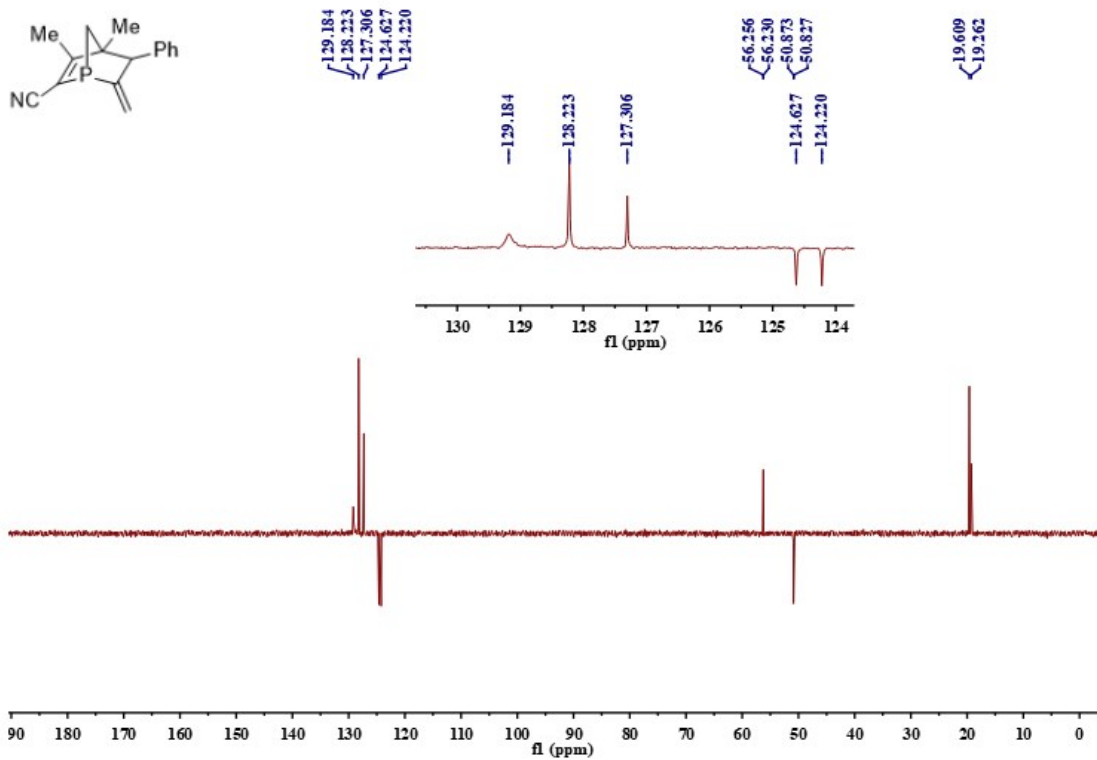

Dept135 (CDCl<sub>3</sub>, 75 MHz) NMR of *endo-3da*

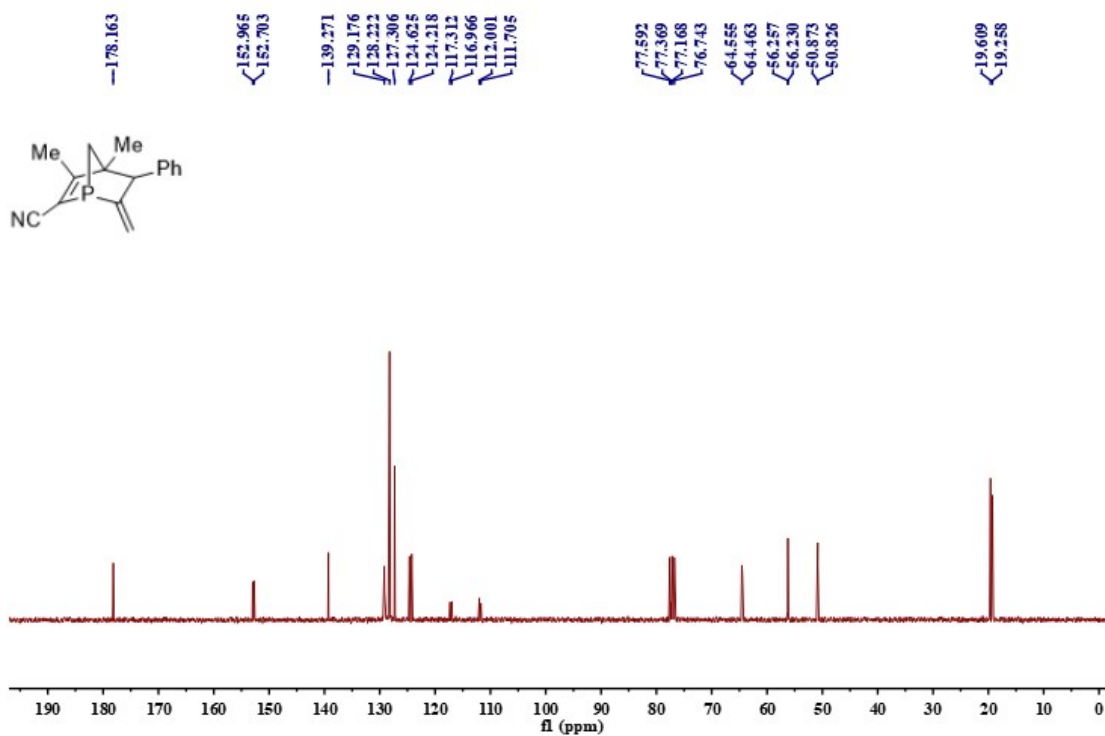

$^{13}\text{C}$  { $^1\text{H}$ } (CDCl<sub>3</sub>, 75 MHz) NMR of *endo-3da*

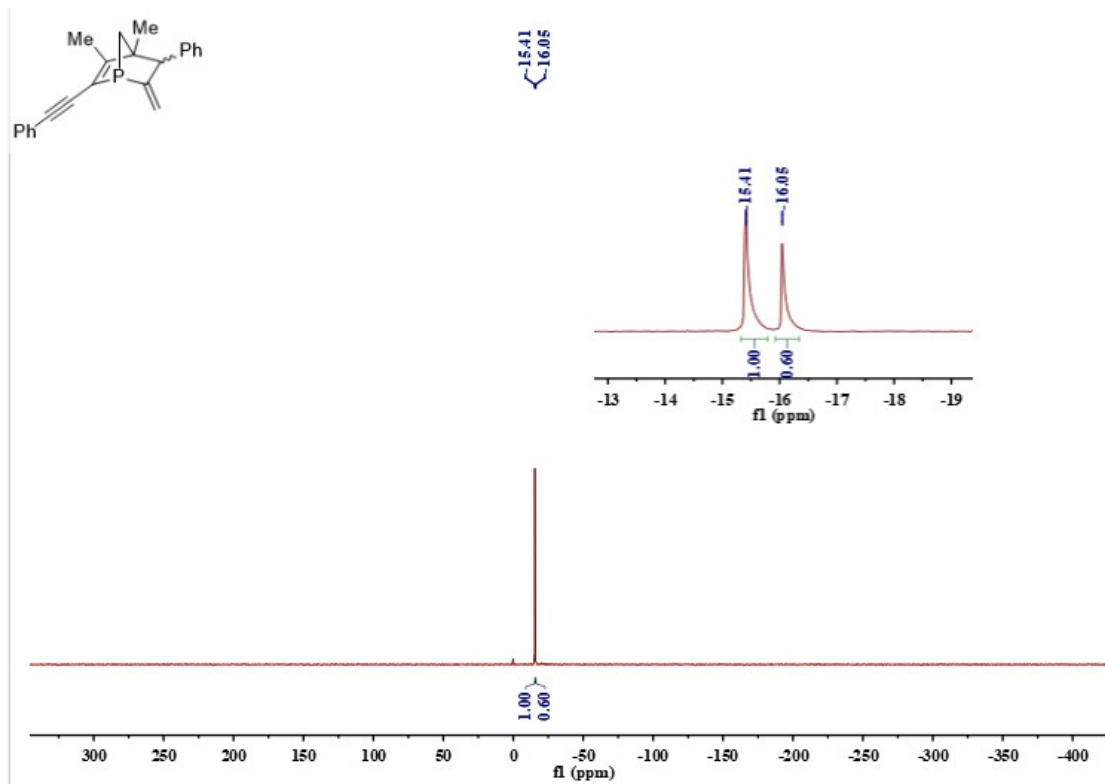

$^{31}\text{P}$  (CDCl<sub>3</sub>, 121 MHz) NMR of **3ea**

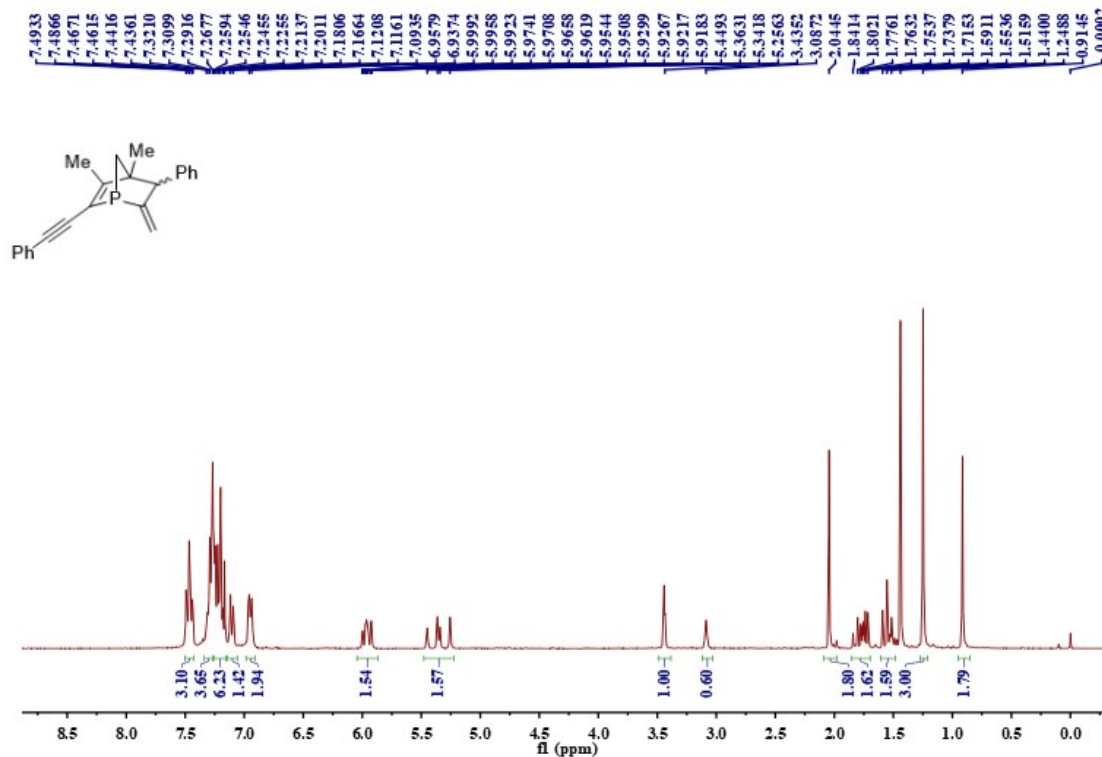

$^1\text{H}$  (CDCl<sub>3</sub>, 300 MHz) NMR of **3ea**

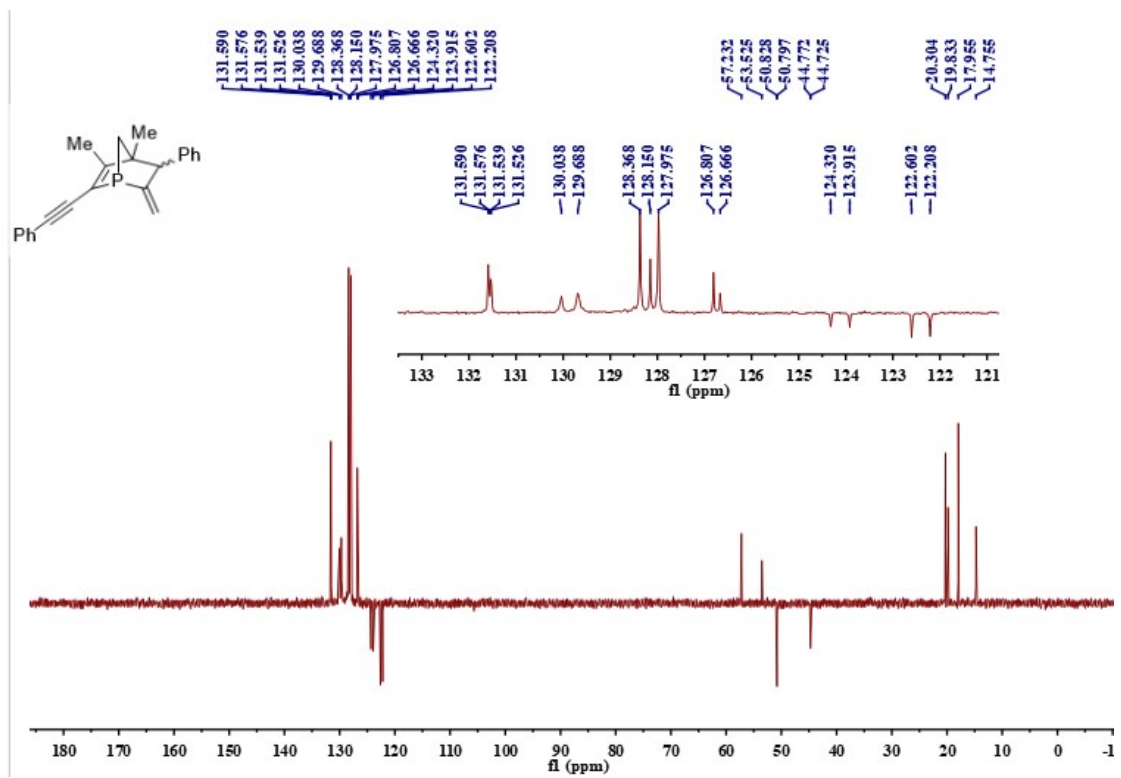

Dept135 (CDCl<sub>3</sub>, 75 MHz) NMR of **3ea**

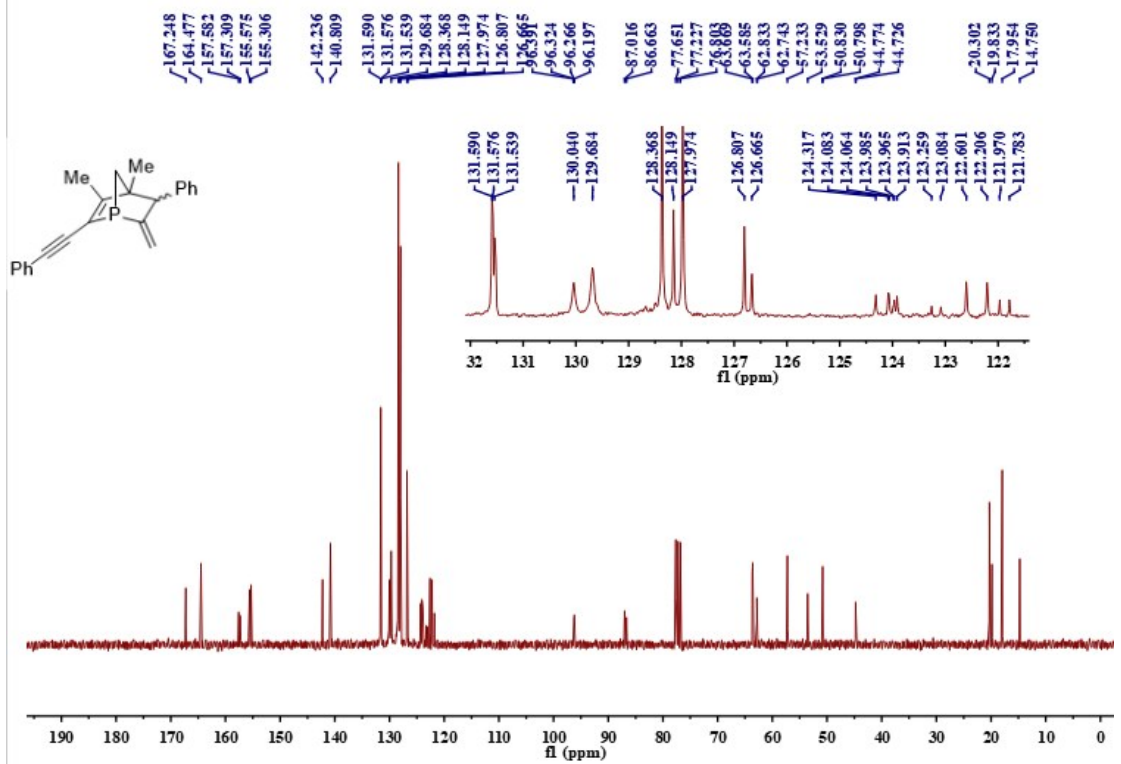

<sup>13</sup>C {<sup>1</sup>H} (CDCl<sub>3</sub>, 75 MHz) NMR of **3ea**

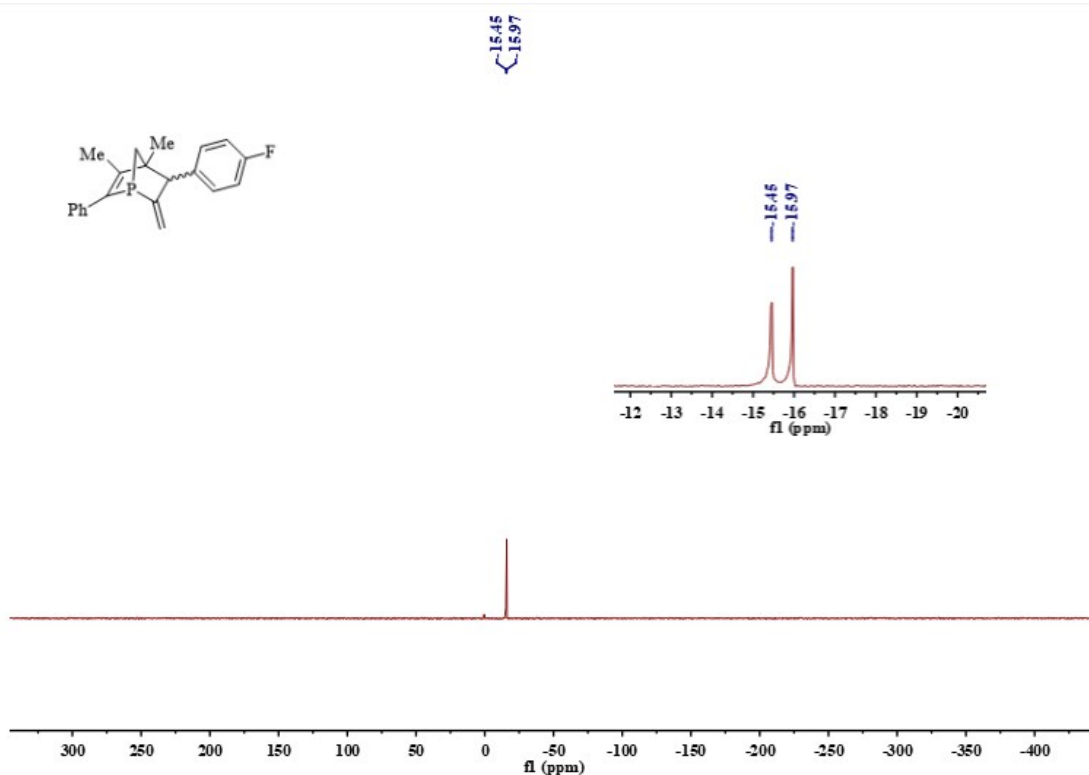

$^{31}\text{P}$  ( $\text{CDCl}_3$ , 121 MHz) NMR of **3ab**

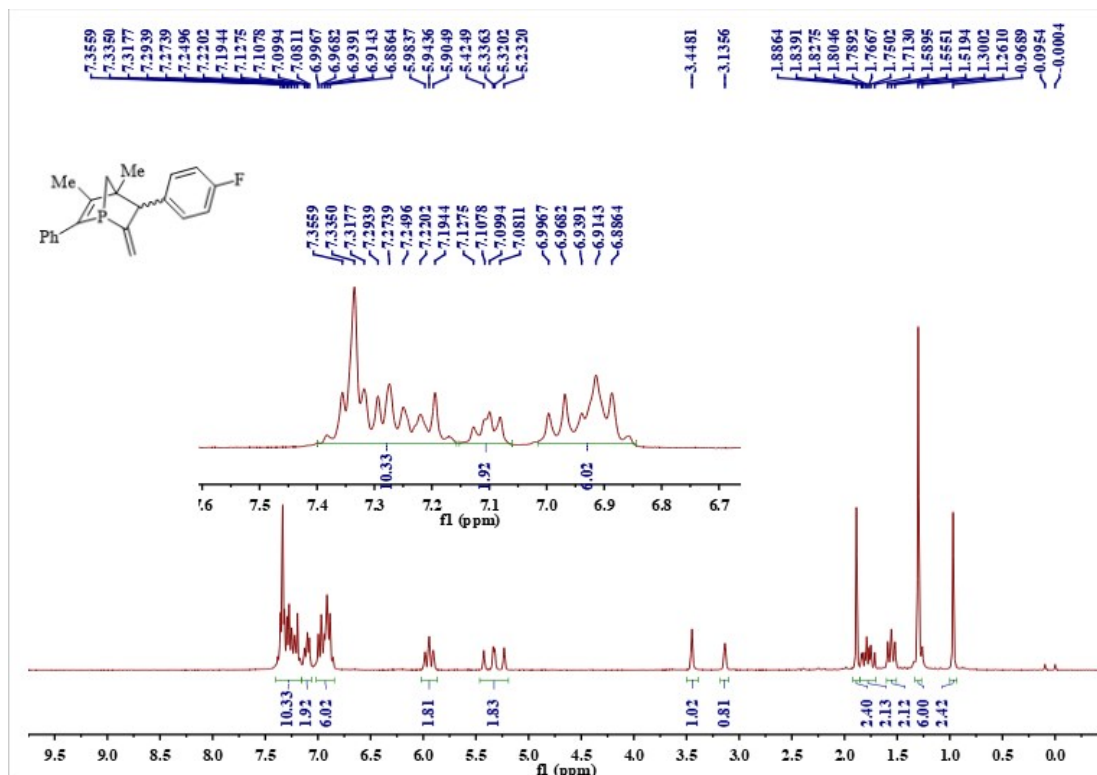

$^1\text{H}$  ( $\text{CDCl}_3$ , 300 MHz) NMR of **3ab**

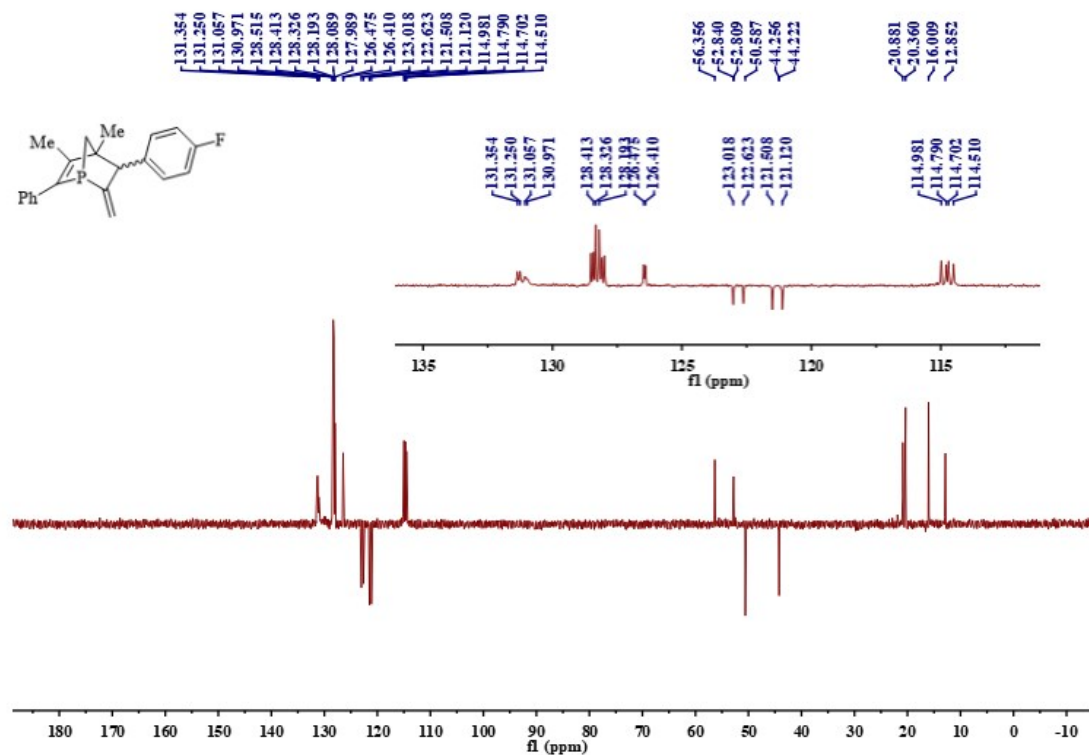

Dept135 (CDCl<sub>3</sub>, 75 MHz) NMR of **3ab**

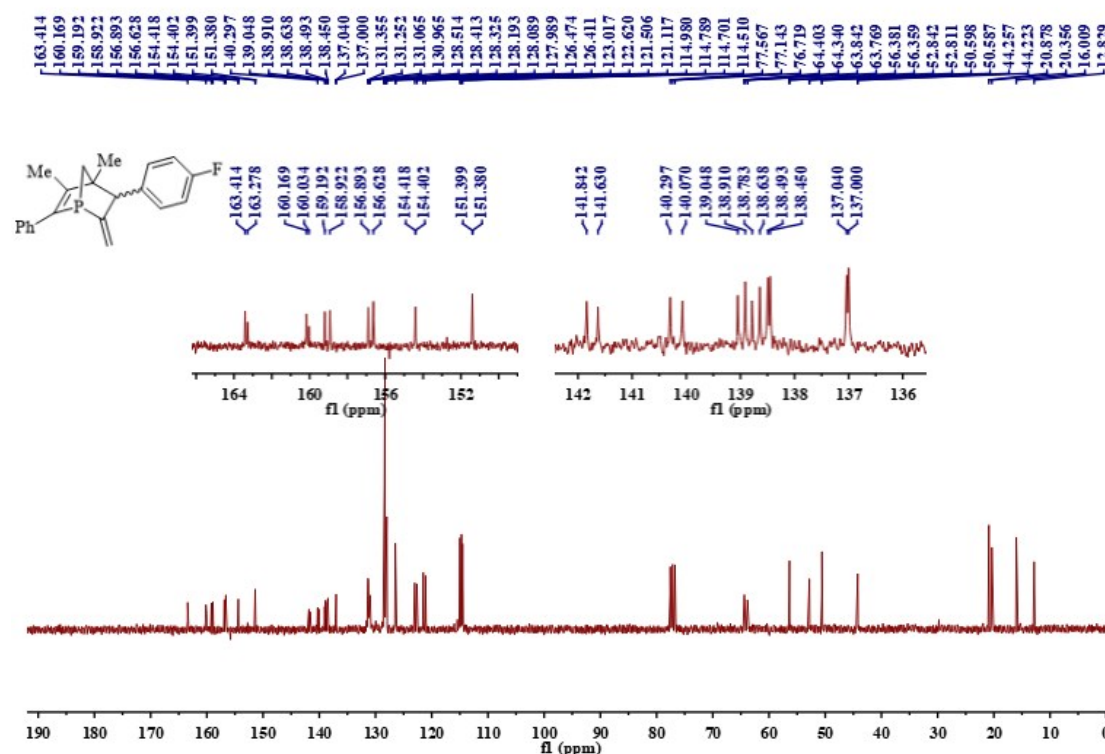

$^{13}\text{C}$  { $^1\text{H}$ } (CDCl<sub>3</sub>, 75 MHz) NMR of **3ab**

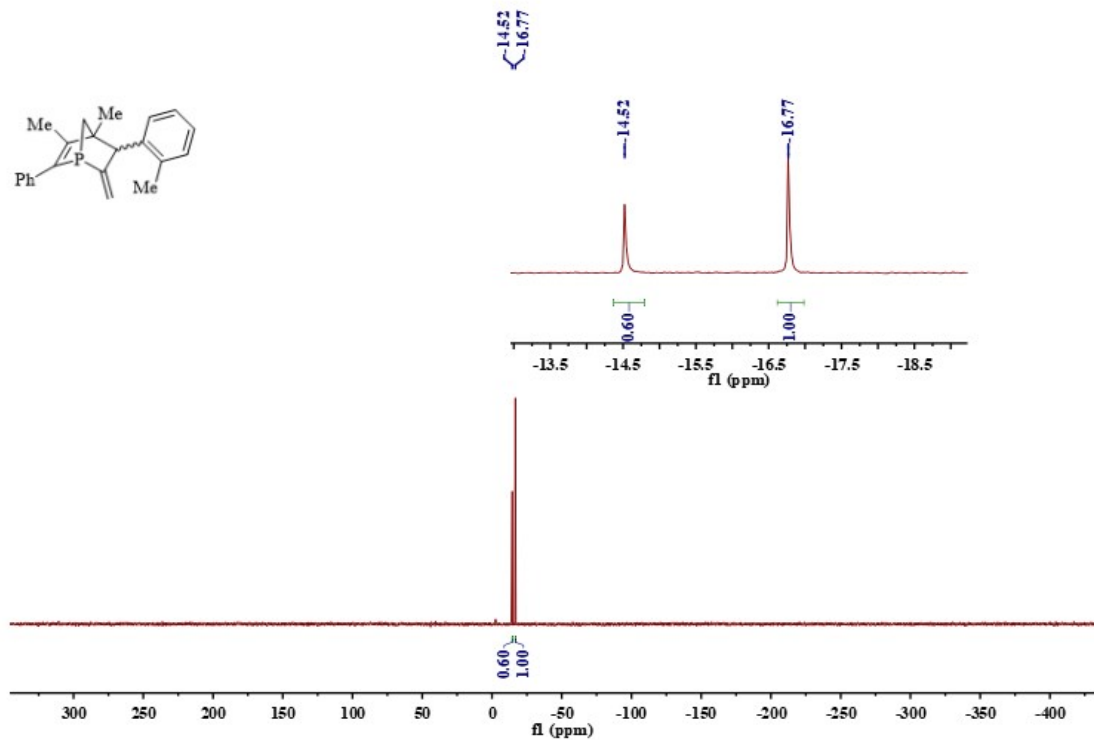

$^{31}\text{P}$  (CDCl<sub>3</sub>, 121 MHz) NMR of **3ac**

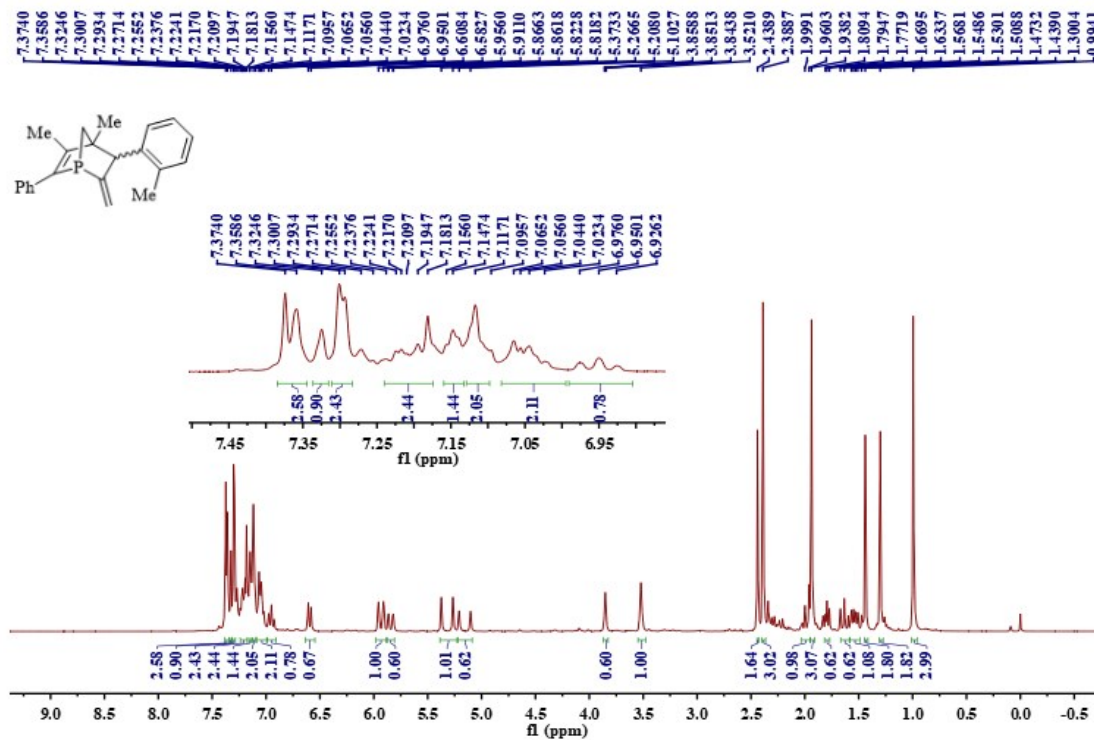

$^1\text{H}$  (CDCl<sub>3</sub>, 300 MHz) NMR of **3ac**

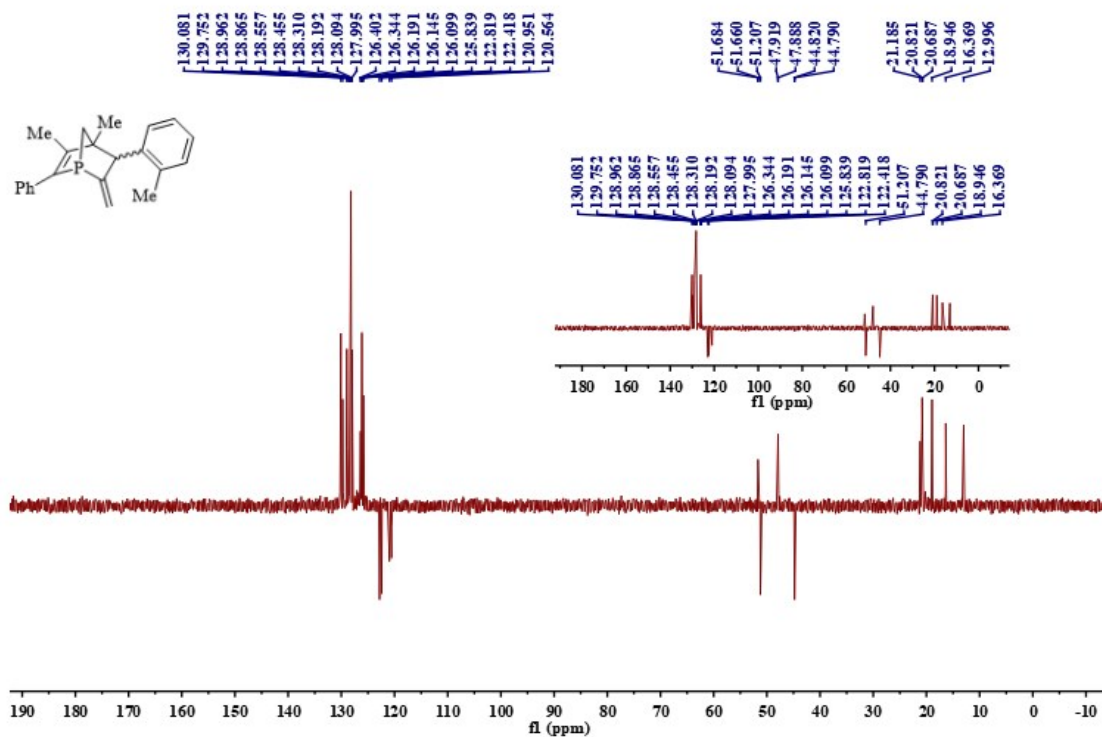

Dept135 (CDCl<sub>3</sub>, 75 MHz) NMR of **3ac**

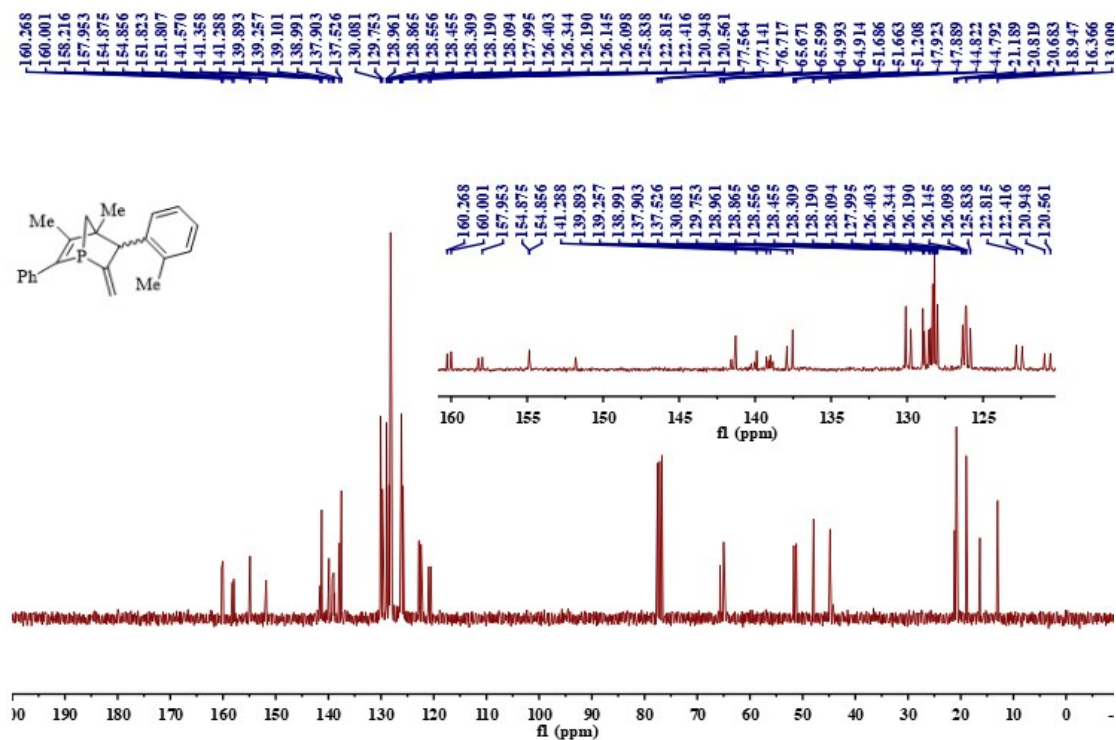

<sup>13</sup>C {<sup>1</sup>H} (CDCl<sub>3</sub>, 75 MHz) NMR of **3ac**

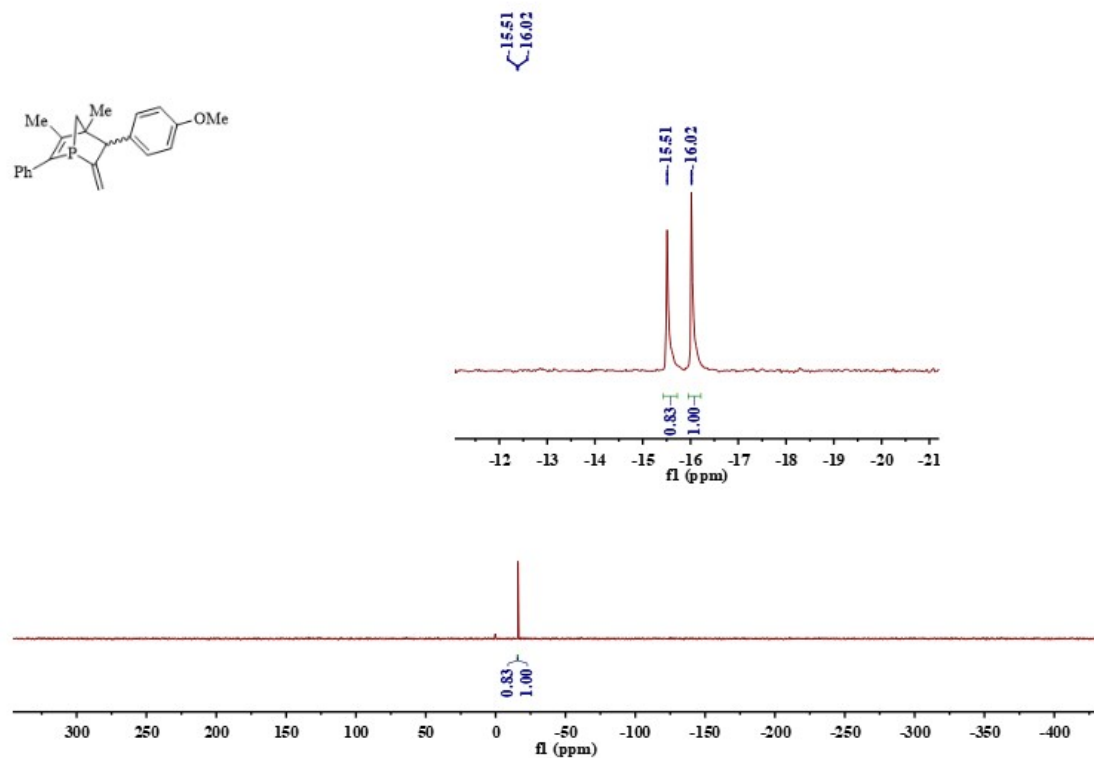

<sup>31</sup>P (CDCl<sub>3</sub>, 121 MHz) NMR of **3ad**

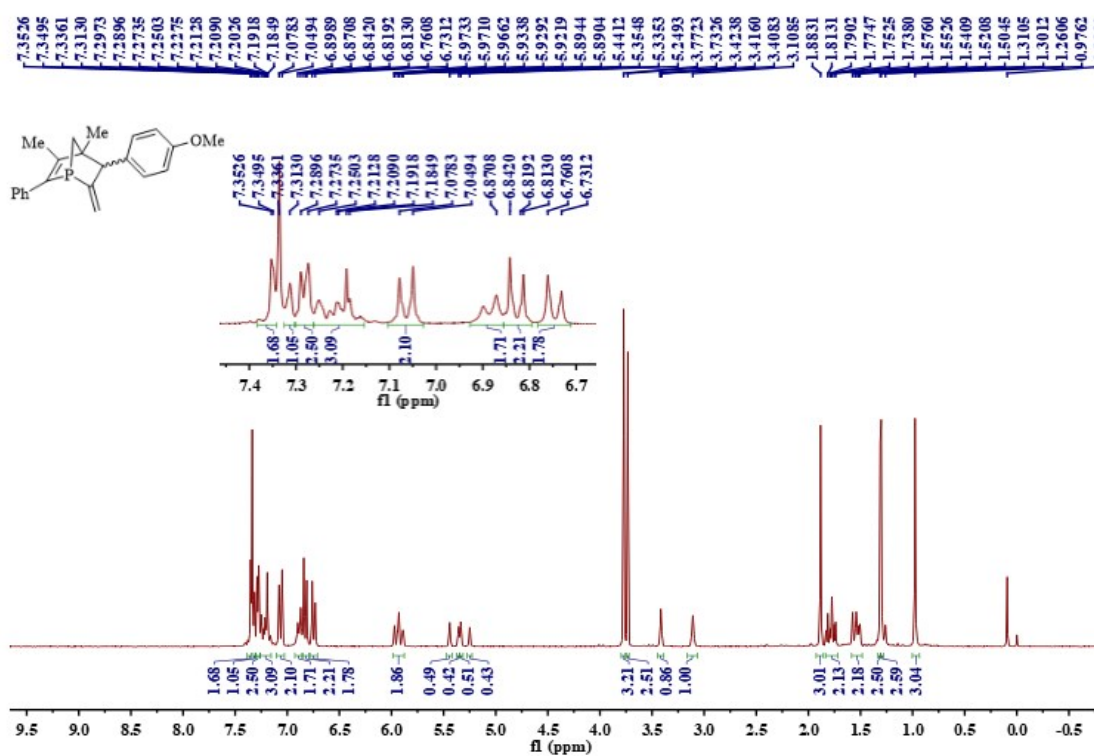

<sup>1</sup>H (CDCl<sub>3</sub>, 300 MHz) NMR of **3ad**



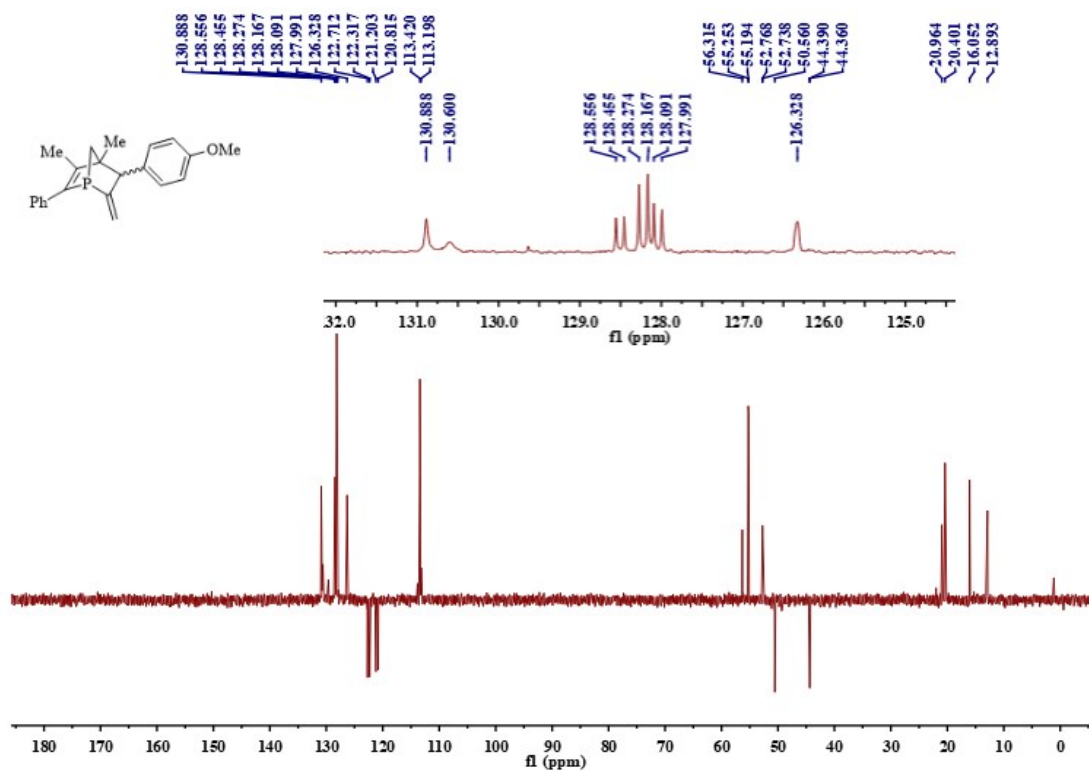

Dept135 (CDCl<sub>3</sub>, 75 MHz) NMR of **3ad**

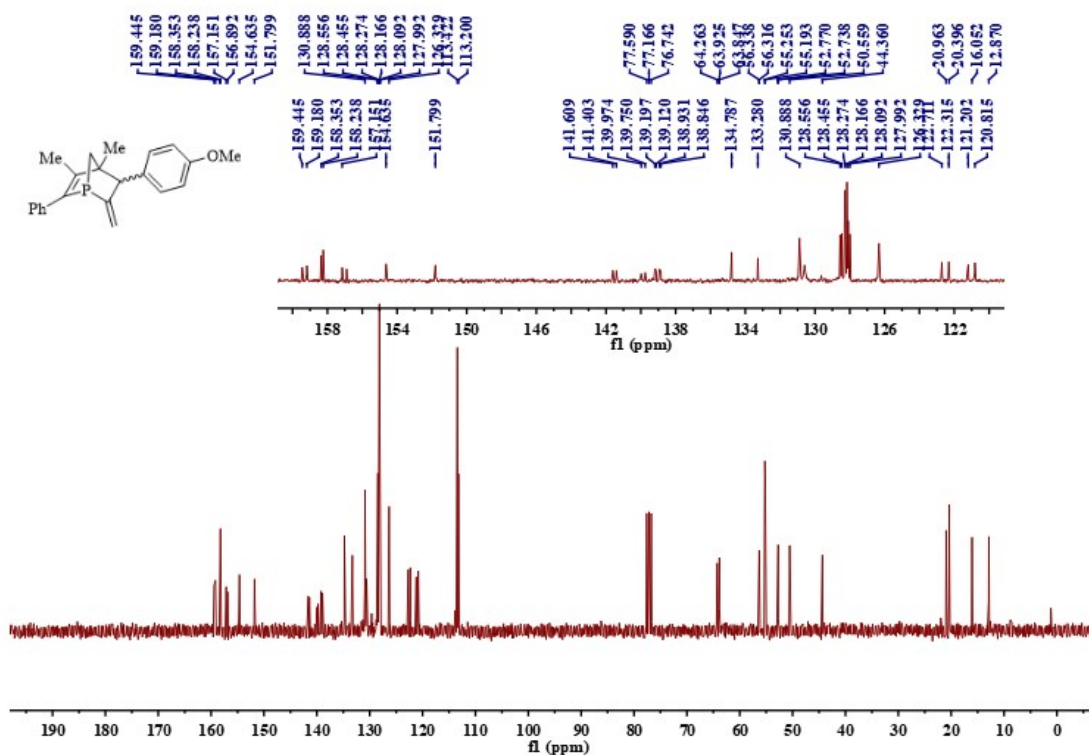

<sup>13</sup>C {<sup>1</sup>H} (CDCl<sub>3</sub>, 75 MHz) NMR of **3ad**

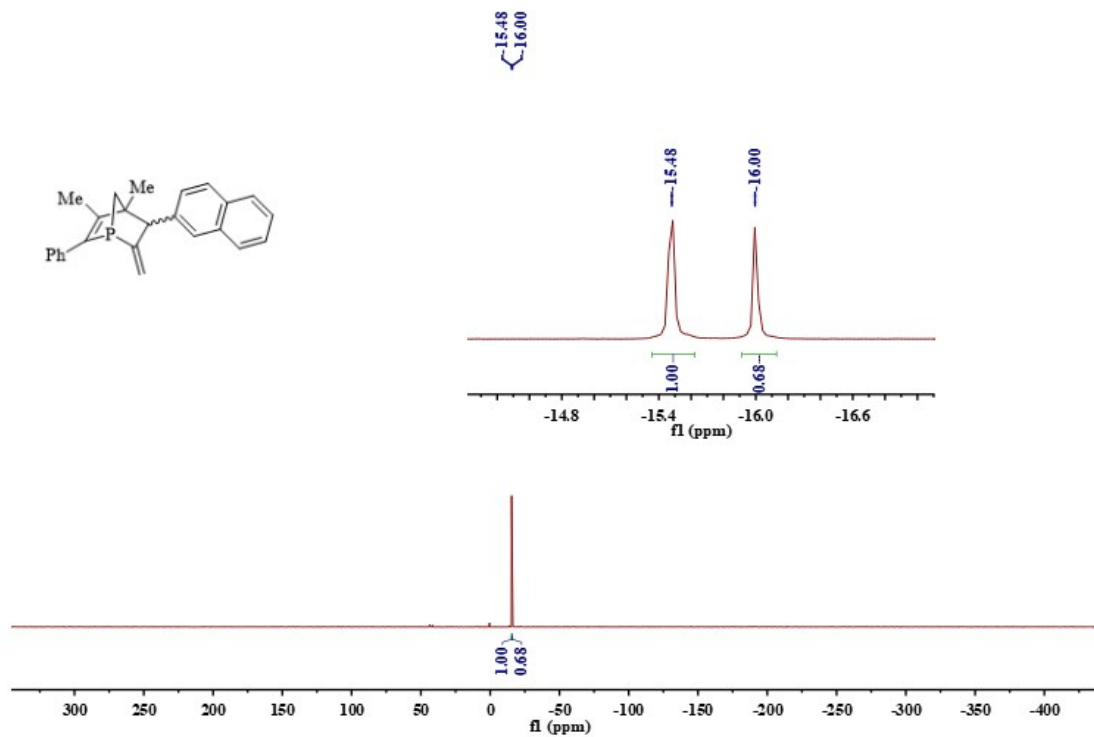

$^{31}\text{P}$  (CDCl<sub>3</sub>, 121 MHz) NMR of **3ae**

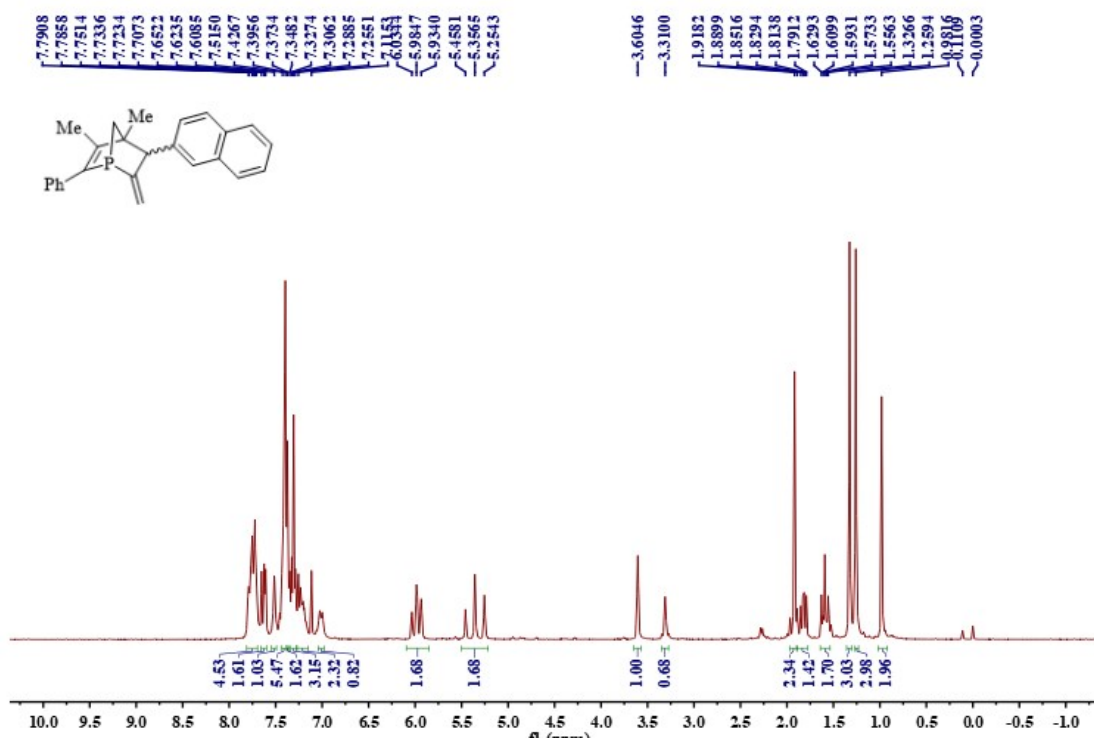

$^1\text{H}$  (CDCl<sub>3</sub>, 300 MHz) NMR of **3ae**

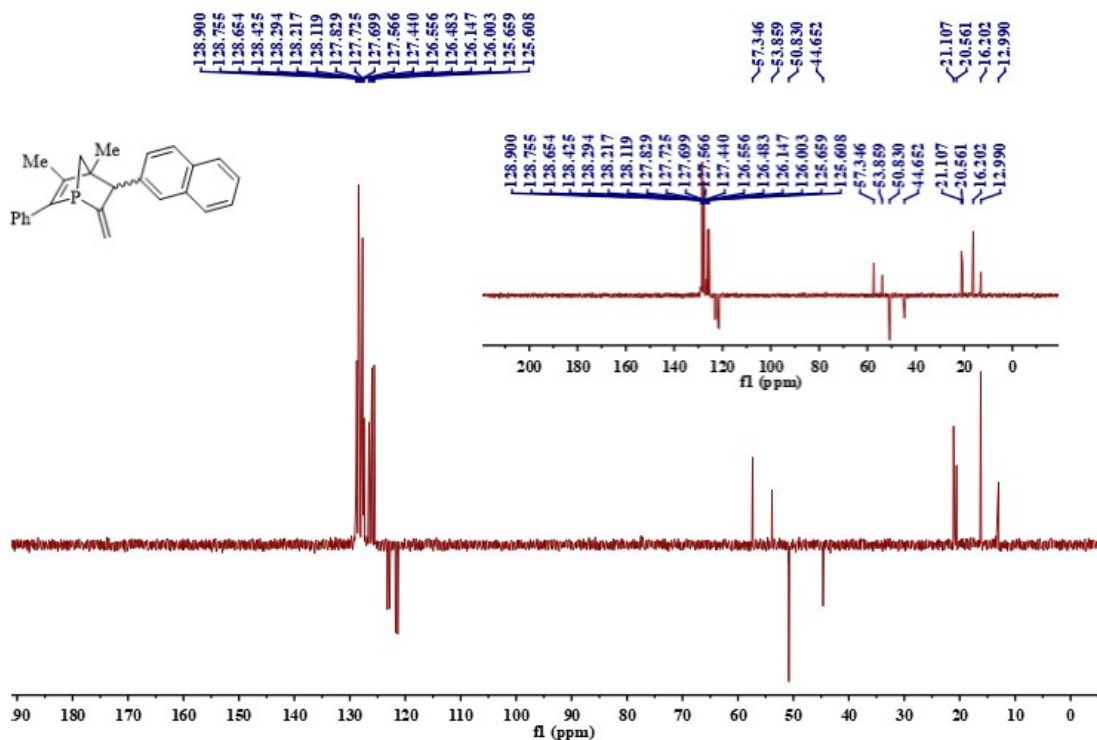

Dept135 (CDCl<sub>3</sub>, 75 MHz) NMR of **3ae**

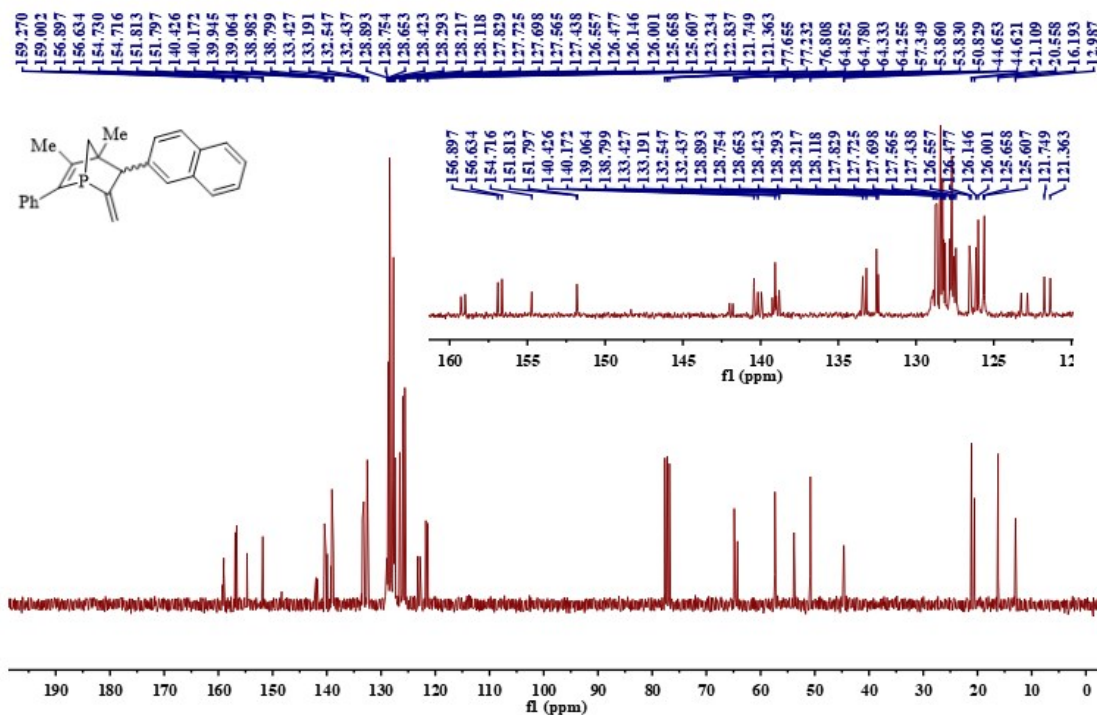

<sup>13</sup>C {<sup>1</sup>H} (CDCl<sub>3</sub>, 75 MHz) NMR of **3ae**

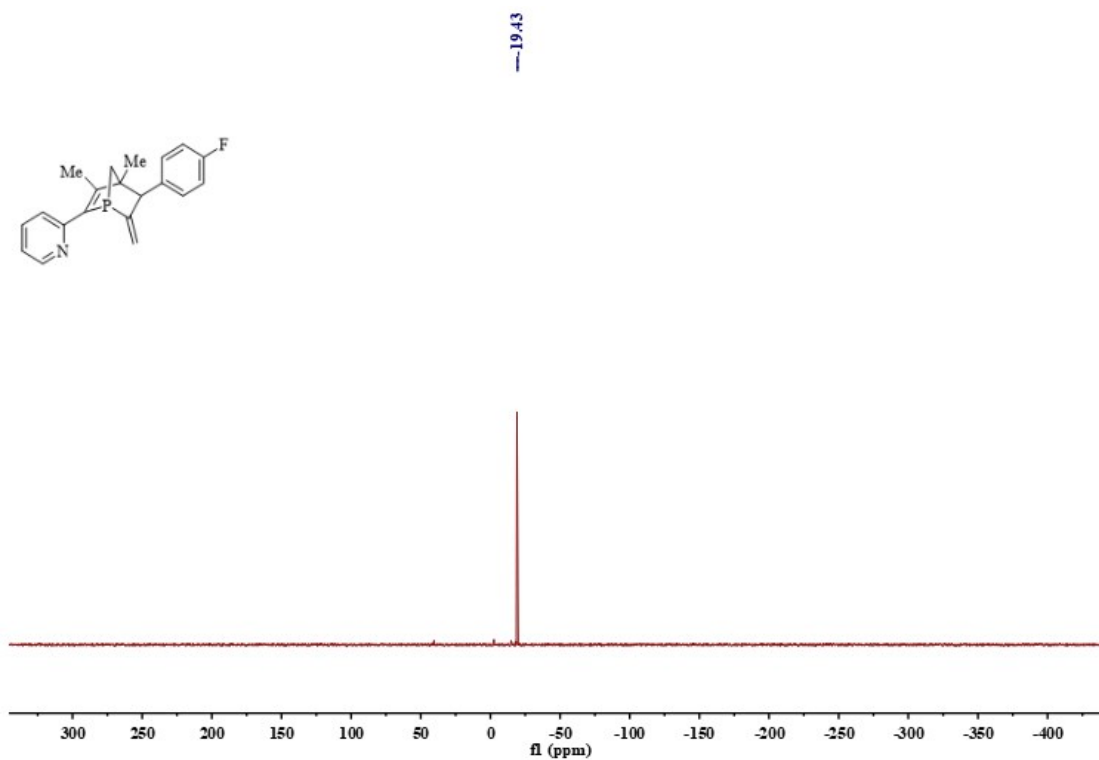

$^{31}\text{P}$  (CDCl<sub>3</sub>, 121 MHz) NMR of *exo*-**3bb**

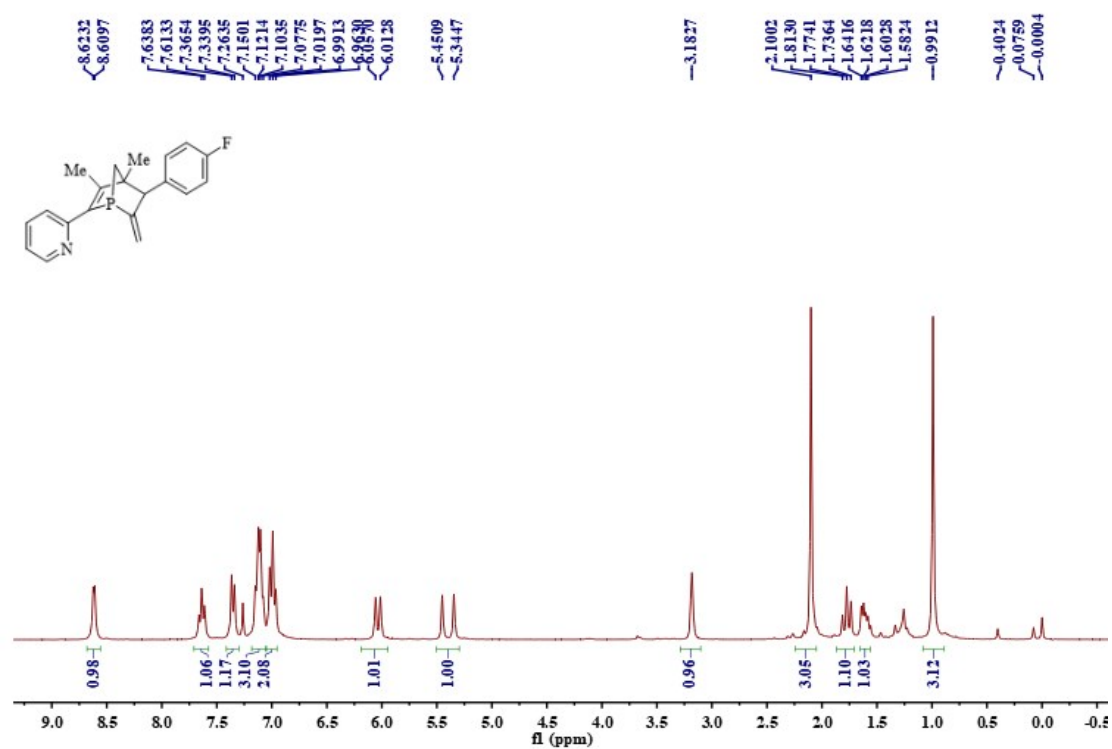

$^1\text{H}$  (CDCl<sub>3</sub>, 300 MHz) NMR of *exo*-**3bb**

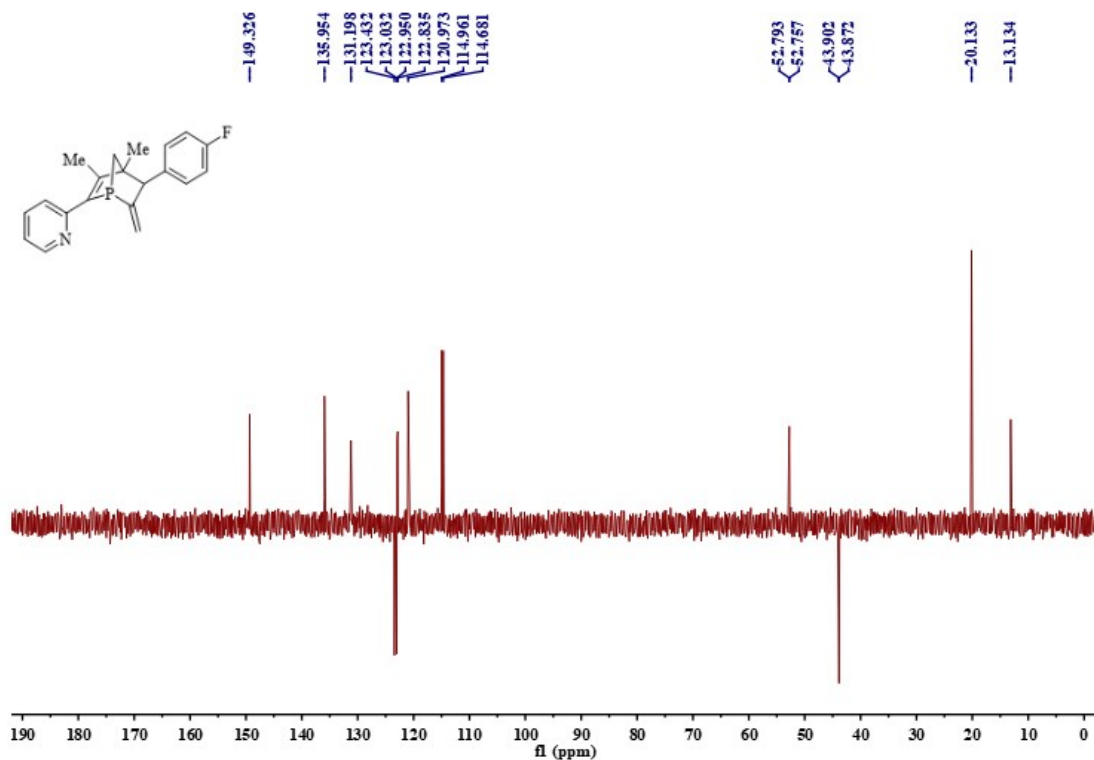

Dept135 (CDCl<sub>3</sub>, 75 MHz) NMR of *exo-3bb*

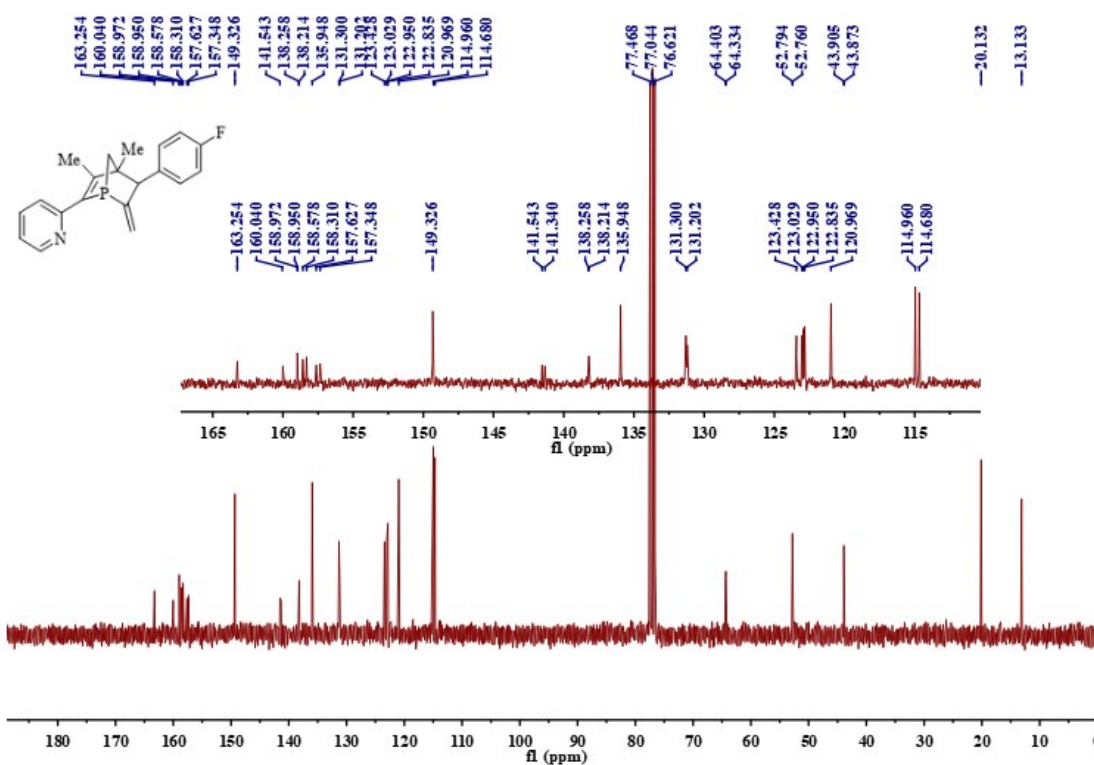

<sup>13</sup>C {<sup>1</sup>H} (CDCl<sub>3</sub>, 75 MHz) NMR of *exo-3bb*

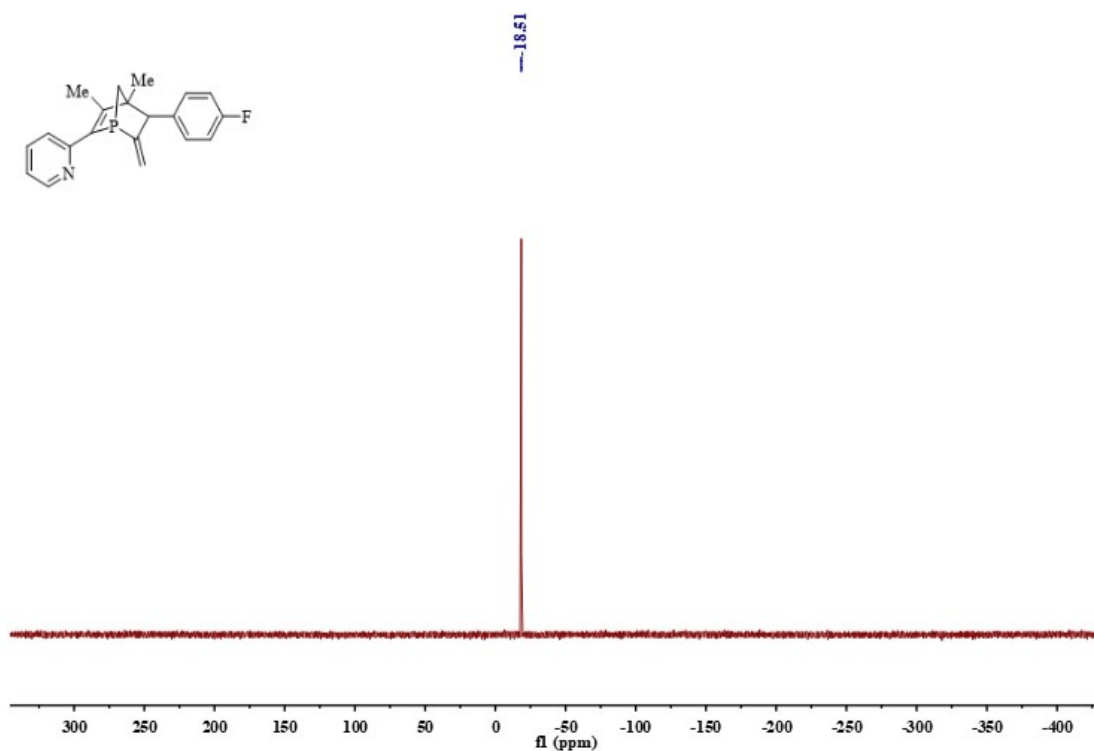

$^{31}\text{P}$  (CDCl<sub>3</sub>, 121 MHz) NMR of *endo-3bb*

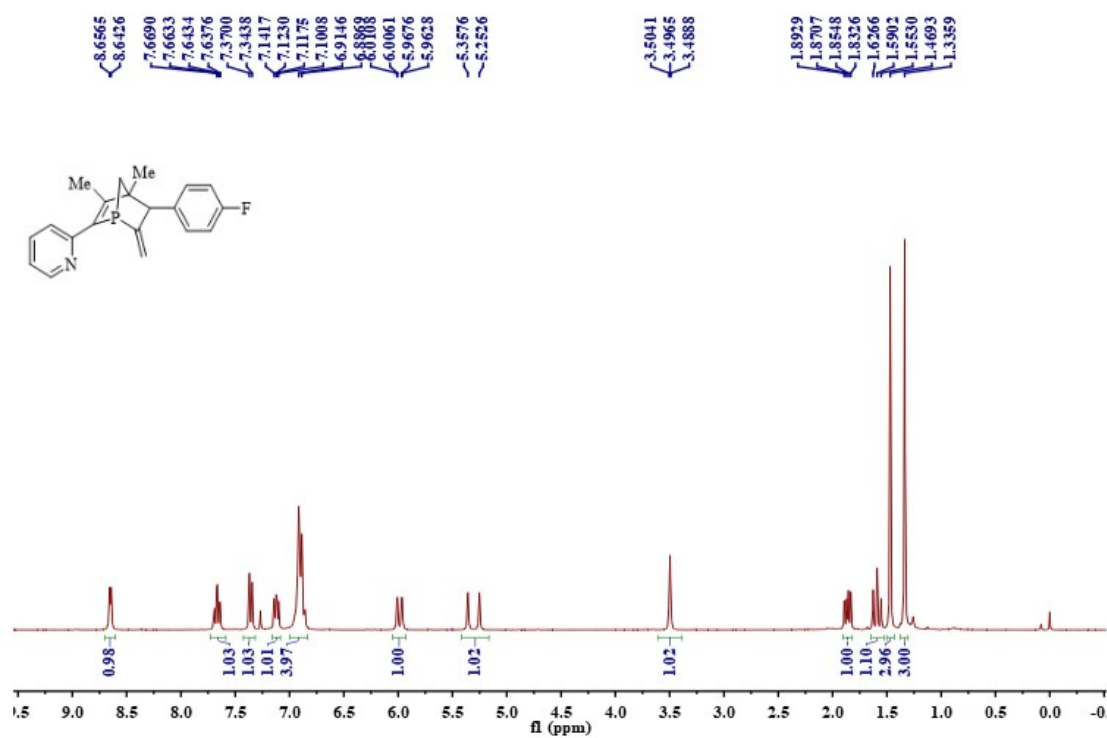

$^1\text{H}$  (CDCl<sub>3</sub>, 300 MHz) NMR of *endo-3bb*

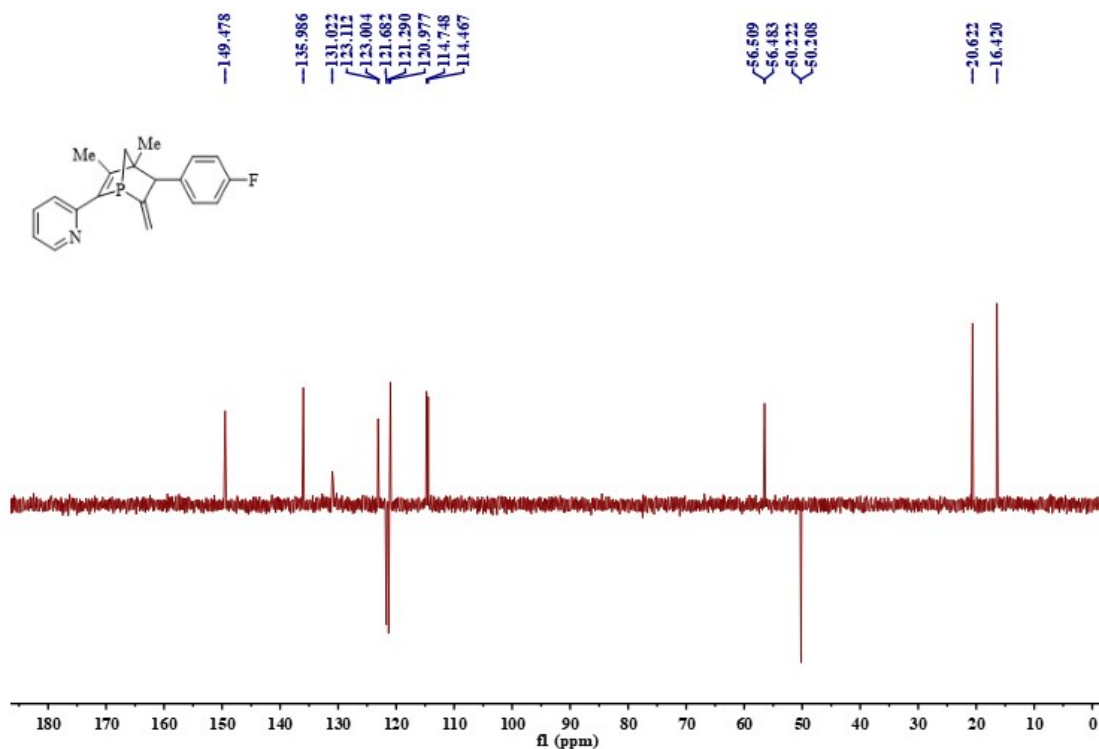

Dept135 (CDCl<sub>3</sub>, 75 MHz) NMR of *endo*-**3bb**

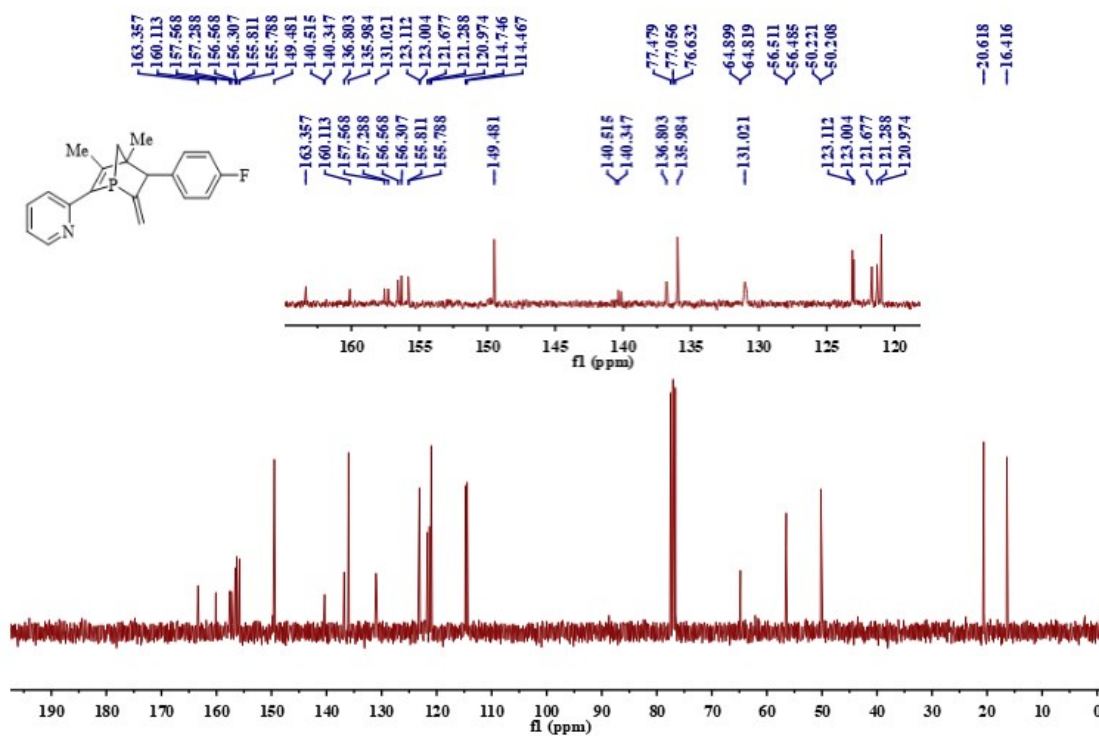

<sup>13</sup>C {<sup>1</sup>H} (CDCl<sub>3</sub>, 75 MHz) NMR of *endo*-**3bb**

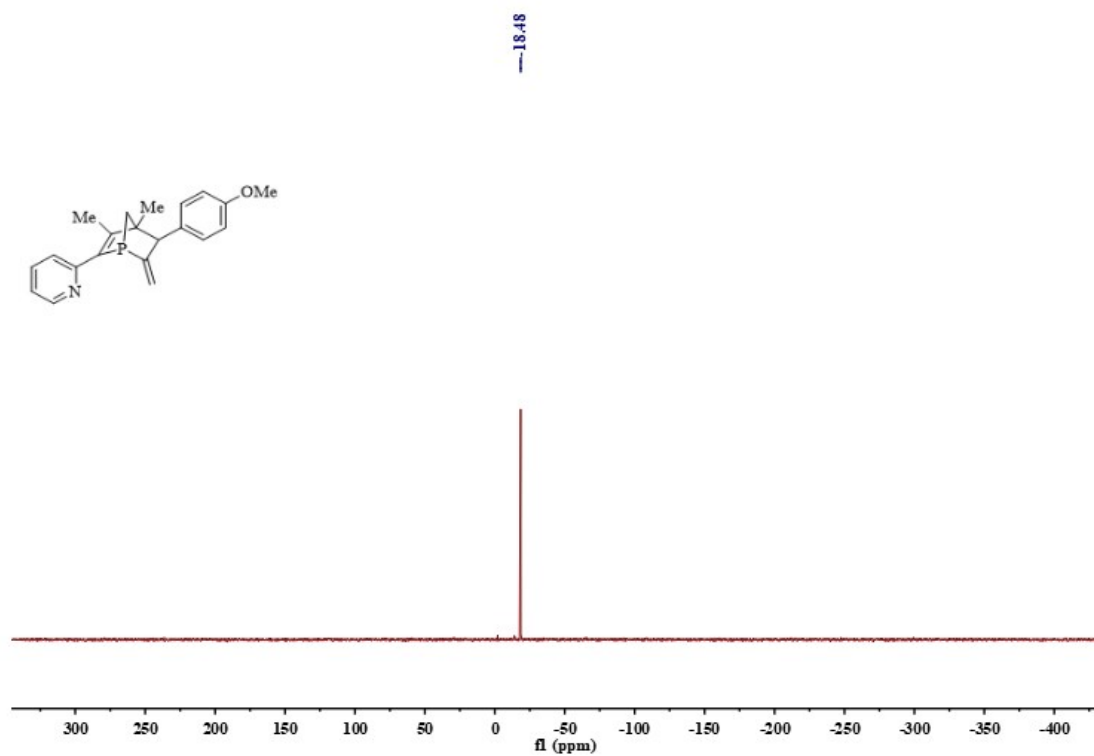

$^{31}\text{P}$  (CDCl<sub>3</sub>, 121 MHz) NMR of *exo*-3bd

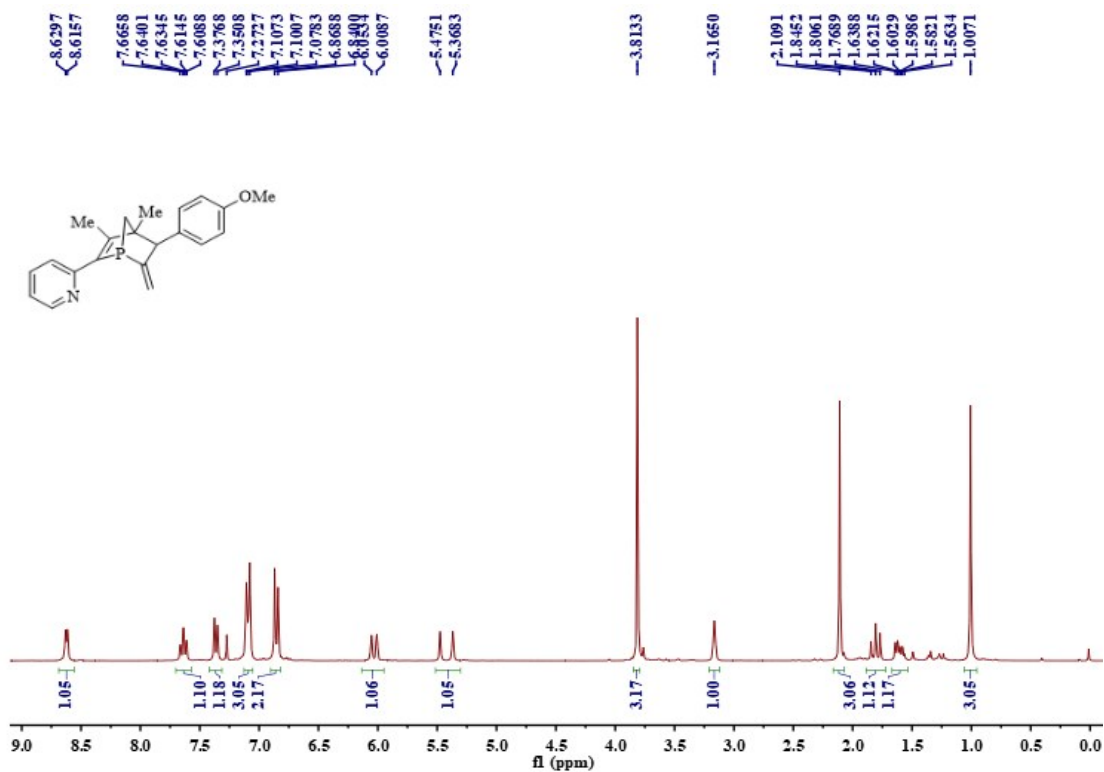

$^1\text{H}$  (CDCl<sub>3</sub>, 300 MHz) NMR of *exo*-3bd



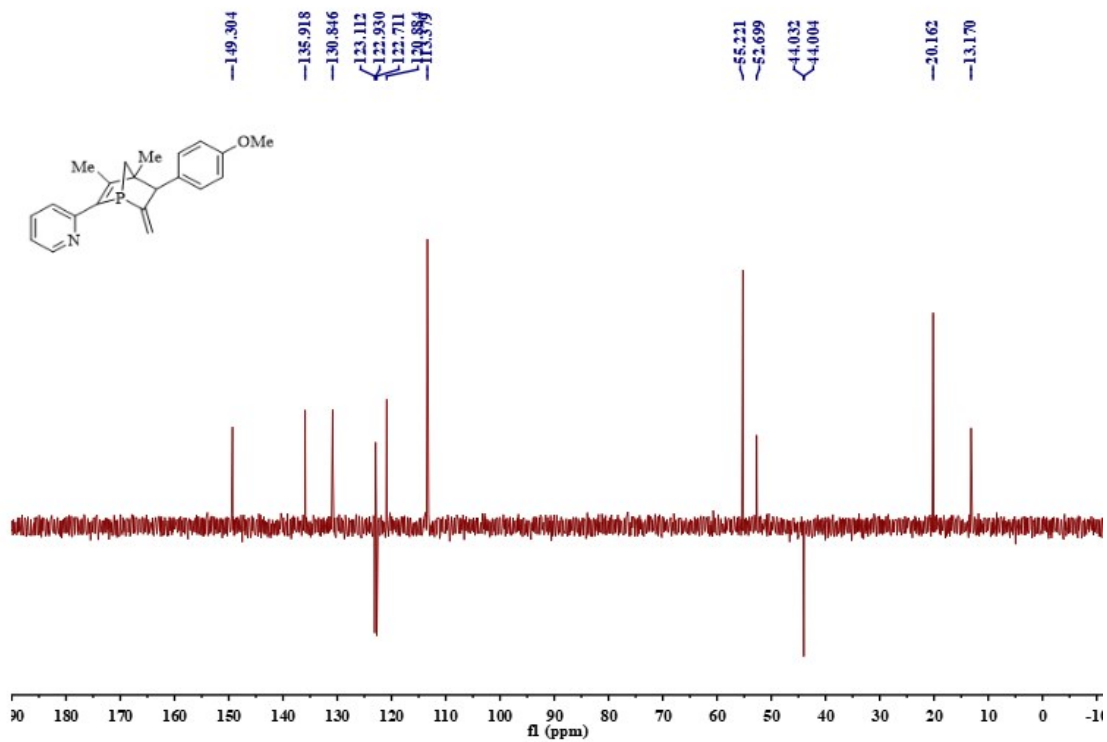

Dept135 (CDCl<sub>3</sub>, 75 MHz) NMR of *exo*-**3bd**

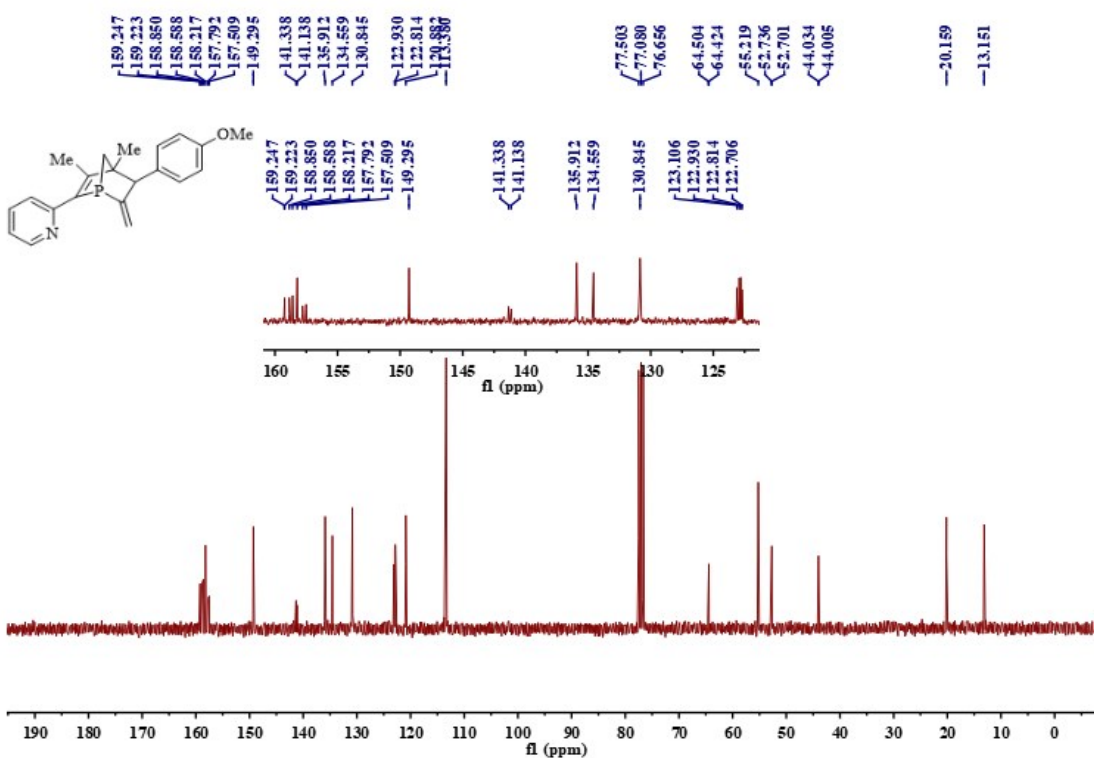

<sup>13</sup>C {<sup>1</sup>H} (CDCl<sub>3</sub>, 75 MHz) NMR of *exo*-**3bd**

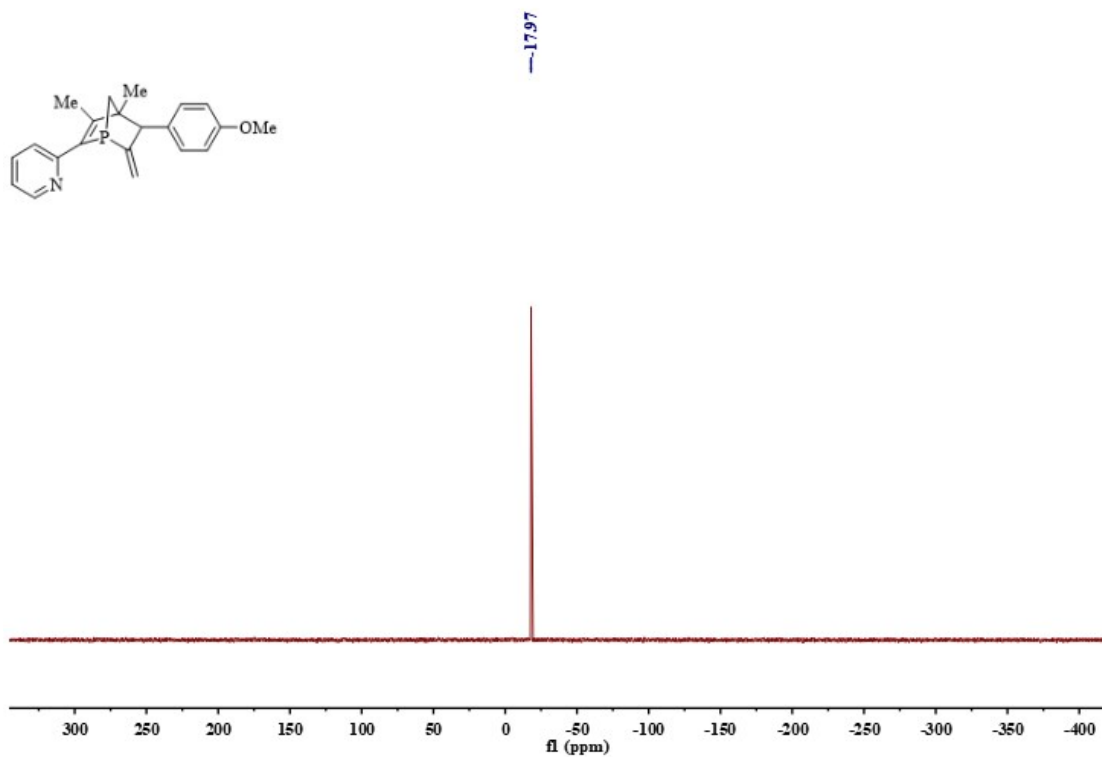

$^{31}\text{P}$  (CDCl<sub>3</sub>, 121 MHz) NMR of *endo-3bd*

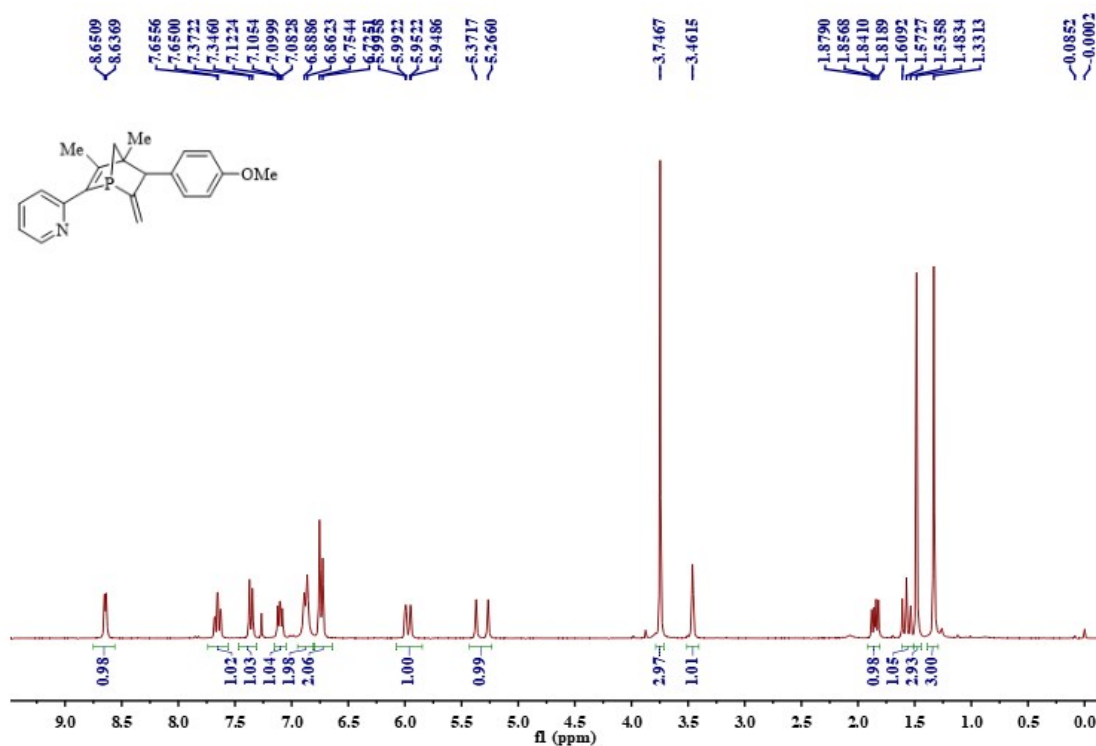

$^1\text{H}$  (CDCl<sub>3</sub>, 300 MHz) NMR of *endo-3bd*

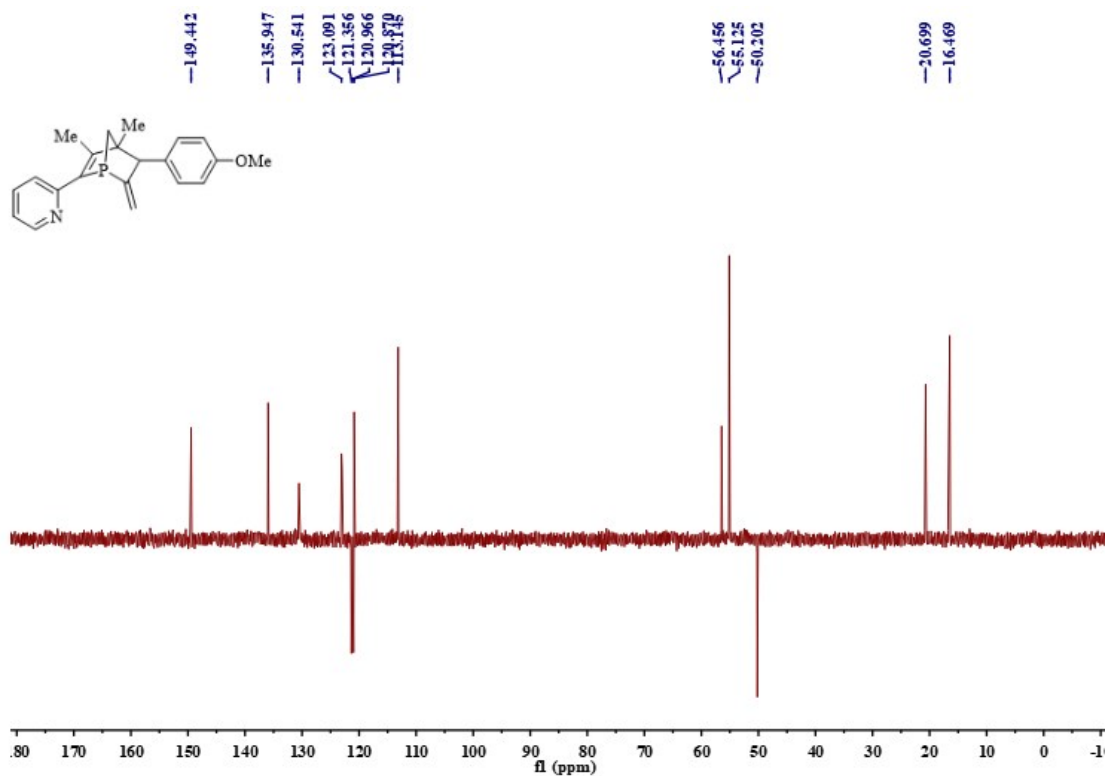

Dept135 (CDCl<sub>3</sub>, 75 MHz) NMR of *endo*-3bd

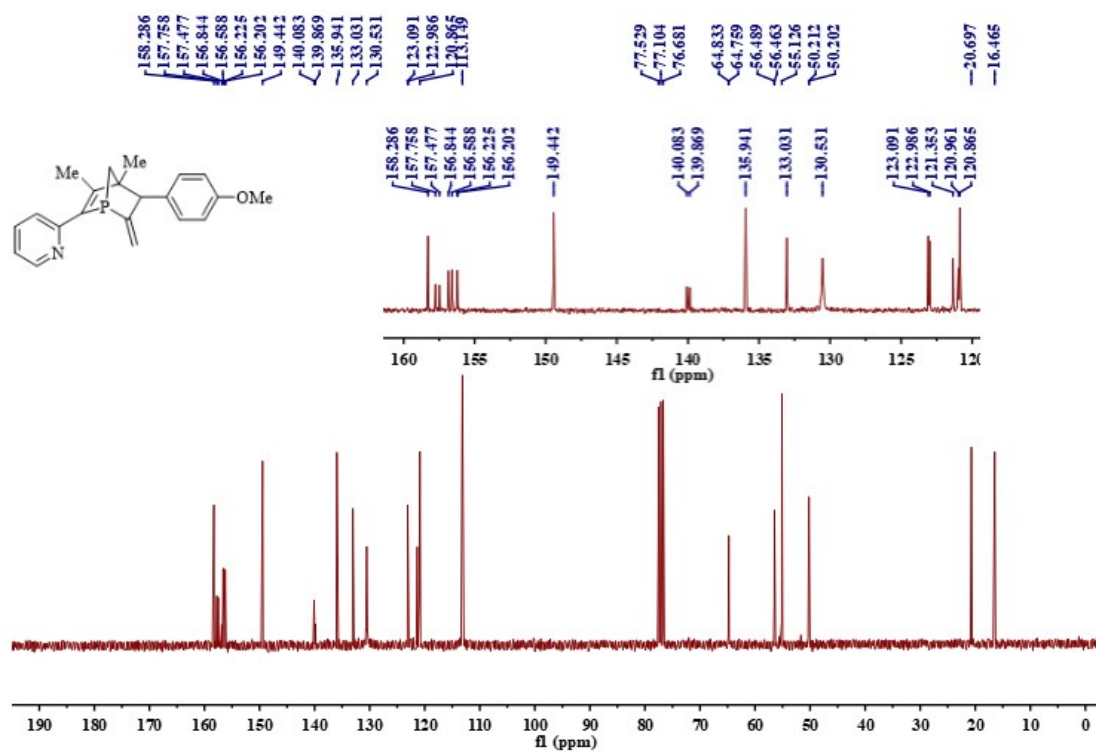

$^{13}\text{C}$  { $^1\text{H}$ } (CDCl<sub>3</sub>, 75 MHz) NMR of *endo*-3bd

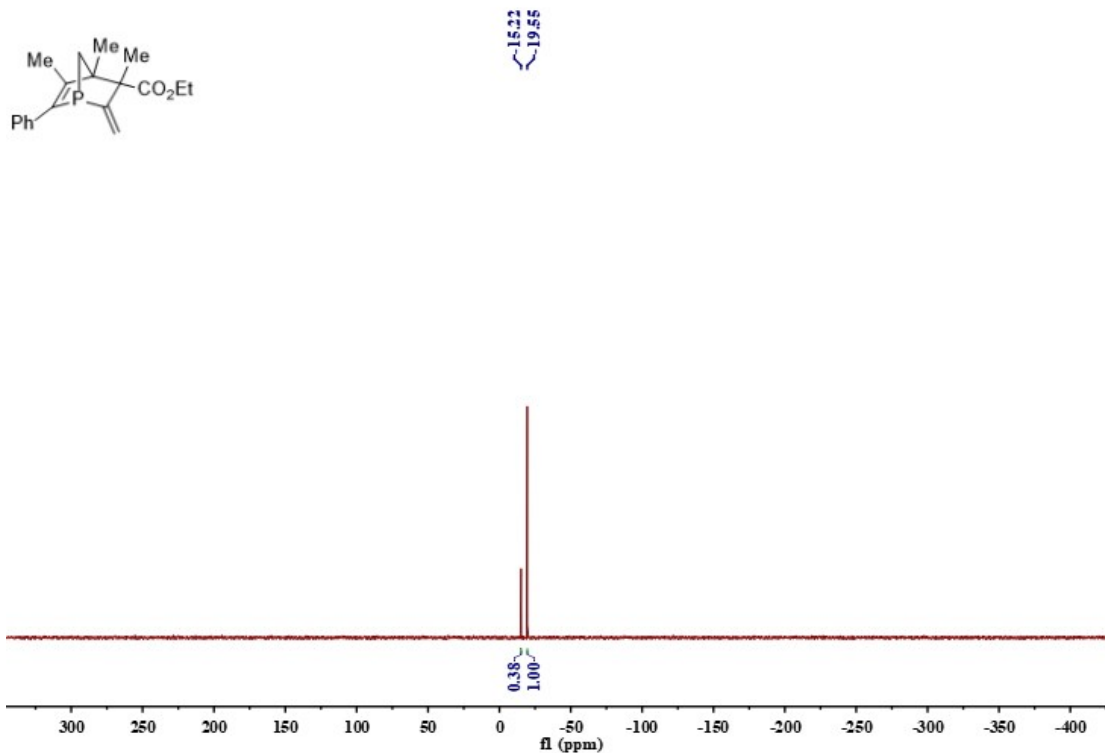

$^{31}\text{P}$  (CDCl<sub>3</sub>, 121 MHz) NMR of **3af**

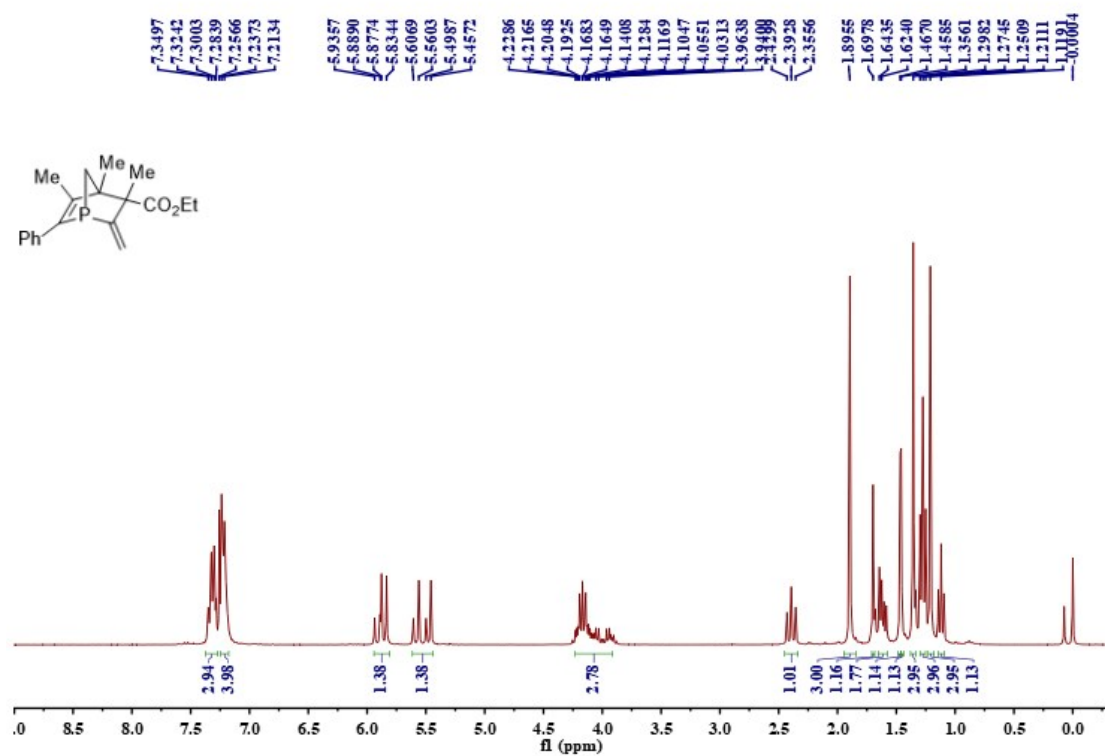

$^1\text{H}$  (CDCl<sub>3</sub>, 300 MHz) NMR of **3af**

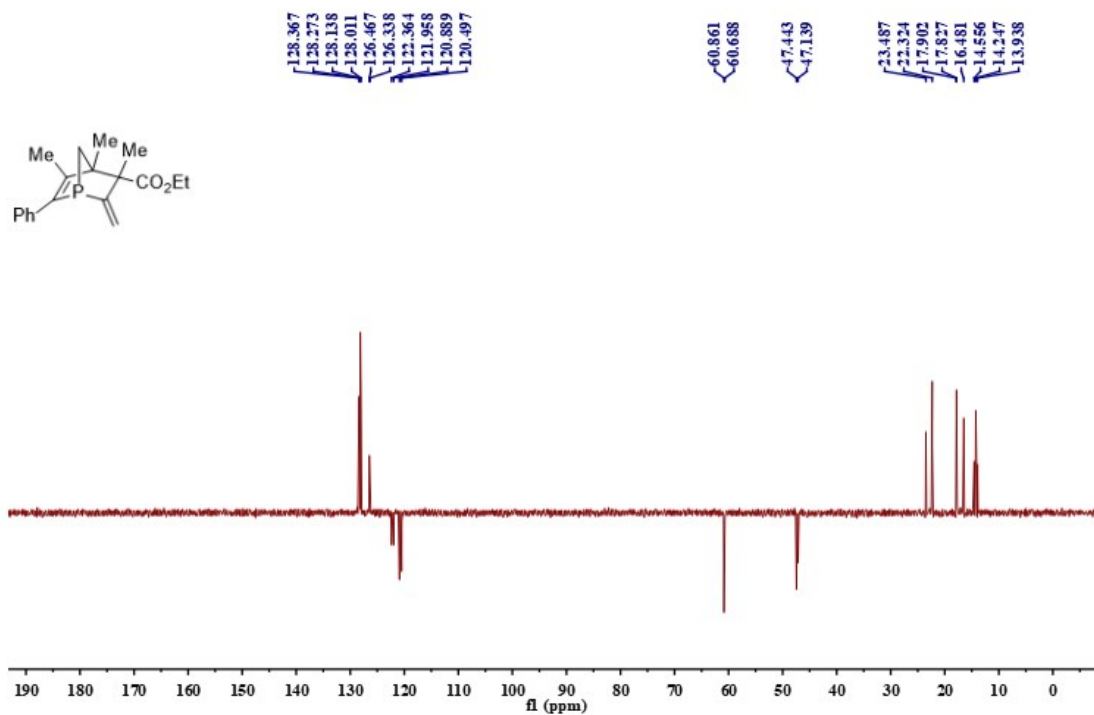

Dept135 (CDCl<sub>3</sub>, 75 MHz) NMR of **3af**

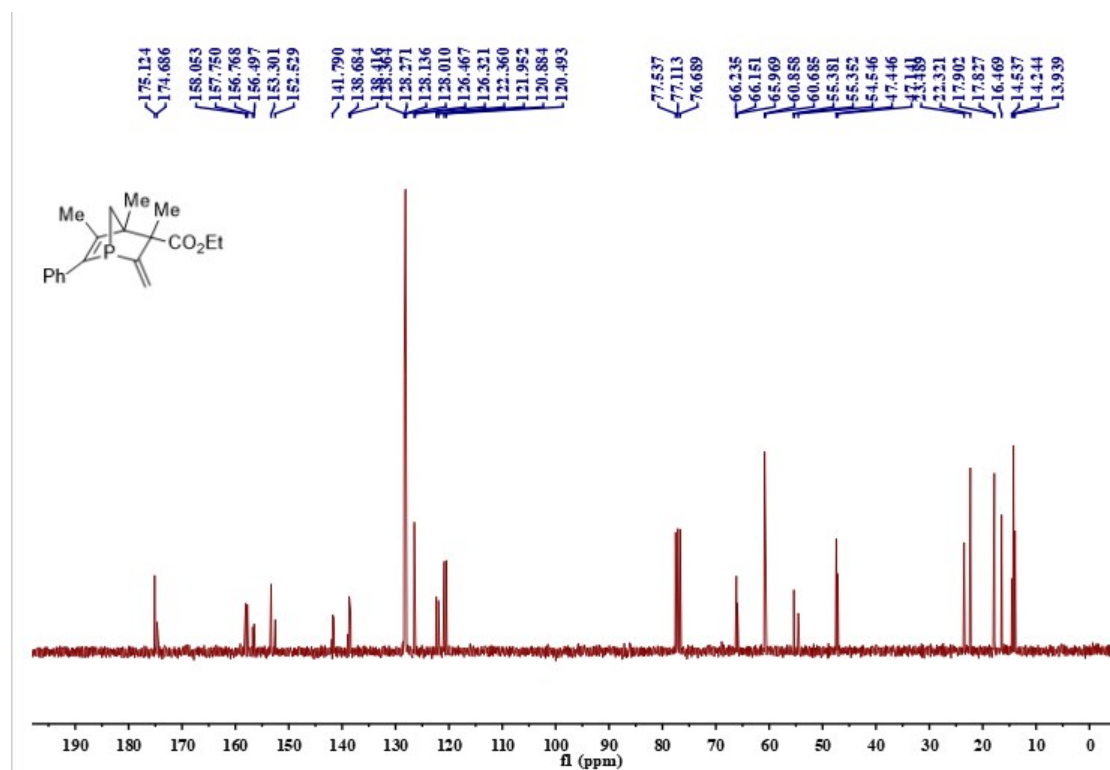

<sup>13</sup>C {<sup>1</sup>H} (CDCl<sub>3</sub>, 75 MHz) NMR of **3af**

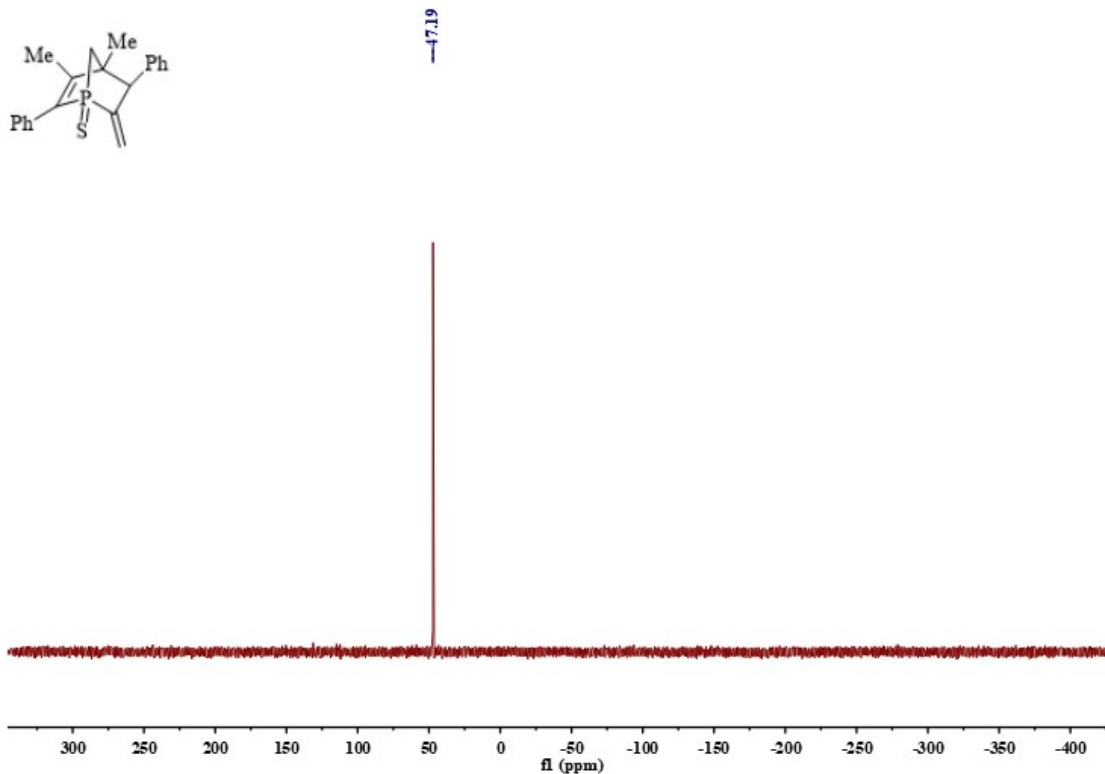

$^{31}\text{P}$  ( $\text{CDCl}_3$ , 121 MHz) NMR of *exo-4a*

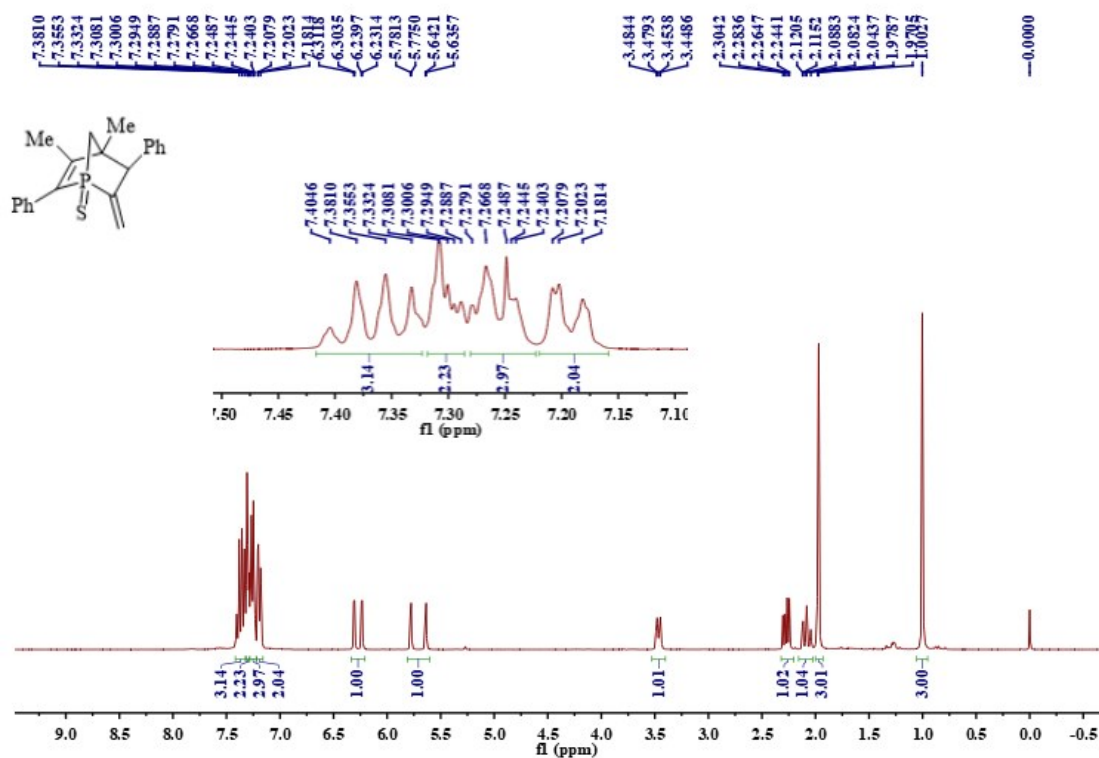

$^1\text{H}$  ( $\text{CDCl}_3$ , 300 MHz) NMR of *exo-4a*

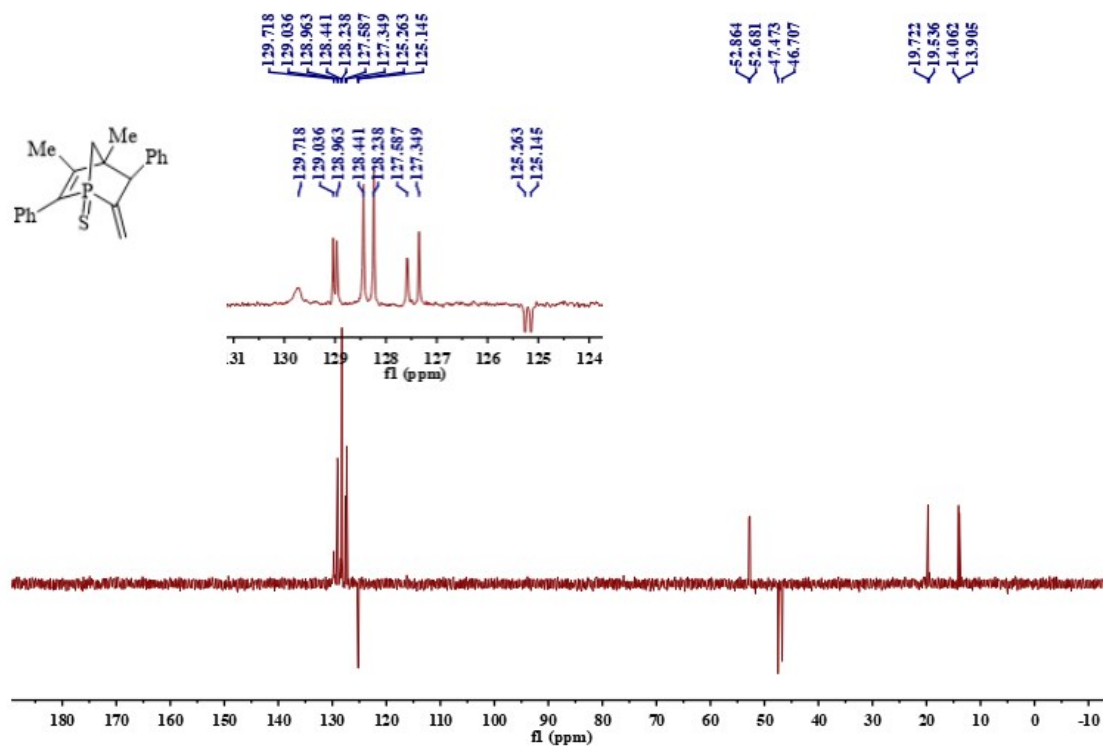

Dept135 (CDCl<sub>3</sub>, 75 MHz) NMR of *exo-4a*

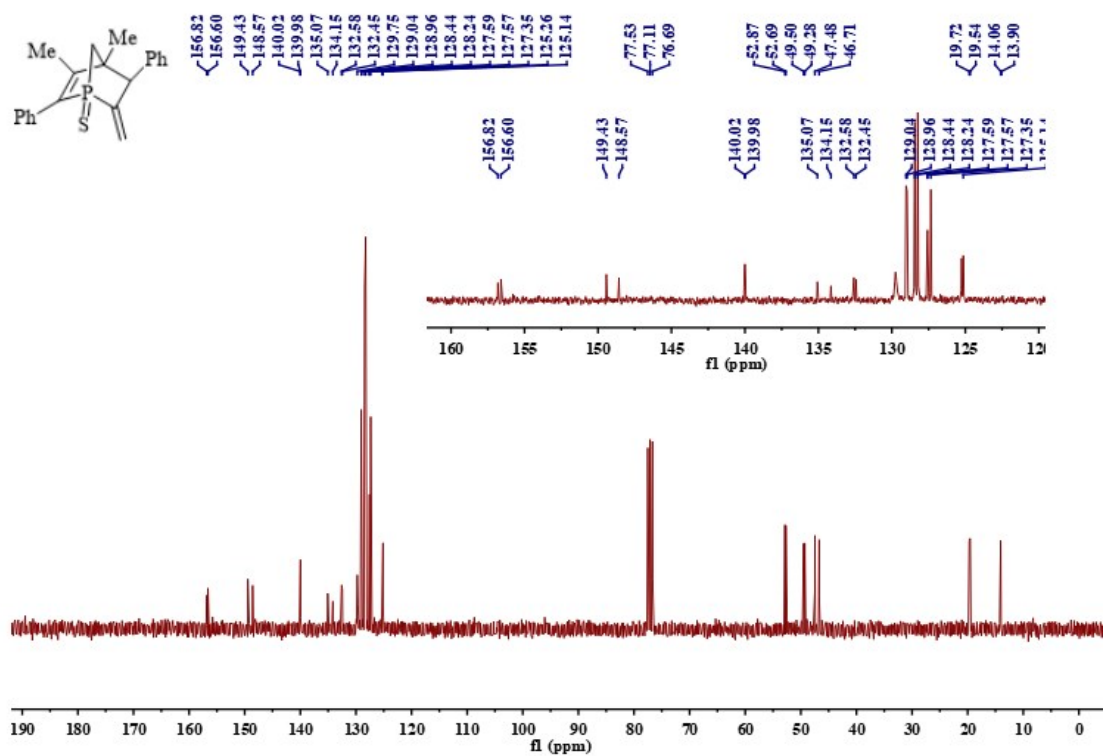

$^{13}\text{C}$  { $^1\text{H}$ } (CDCl<sub>3</sub>, 75 MHz) NMR of *exo-4a*

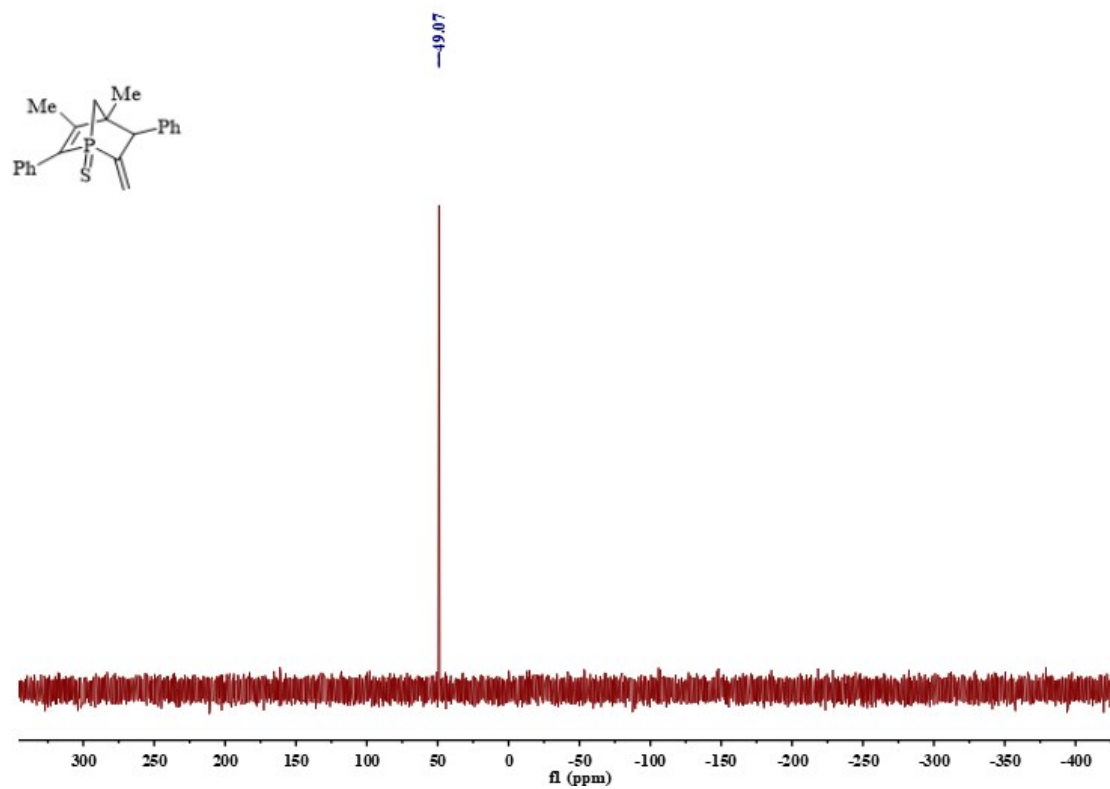

$^{31}\text{P}$  ( $\text{CDCl}_3$ , 121 MHz) NMR of *endo-4a*

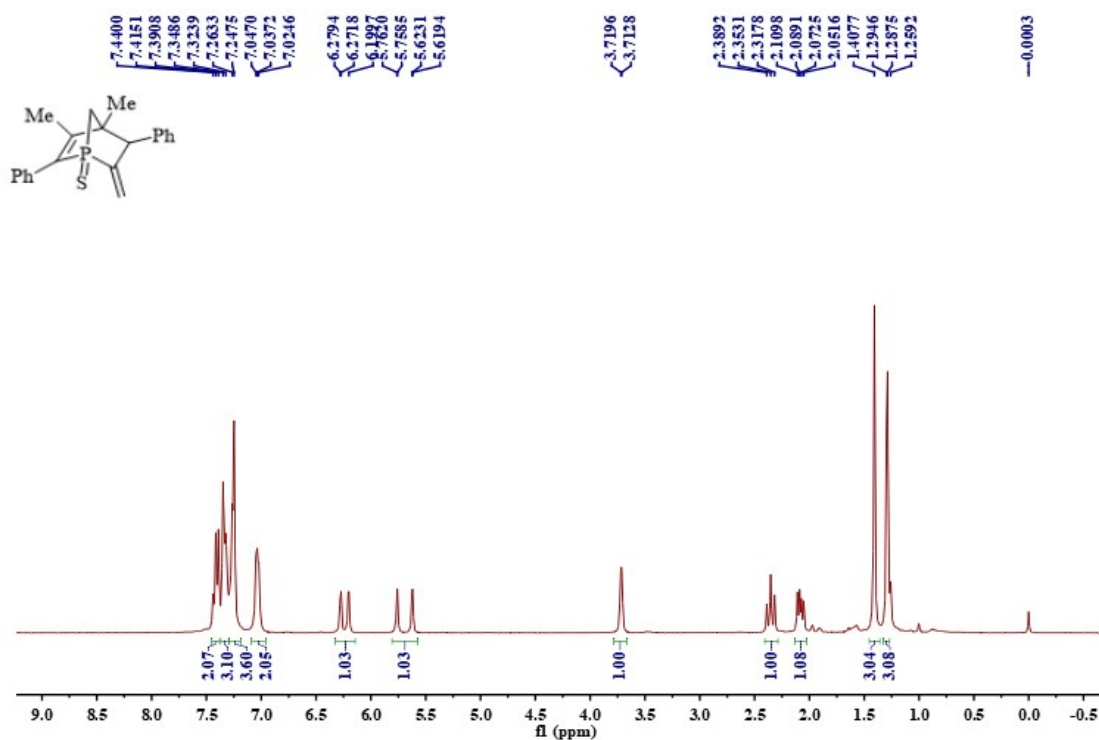

$^1\text{H}$  ( $\text{CDCl}_3$ , 300 MHz) NMR of *endo-4a*



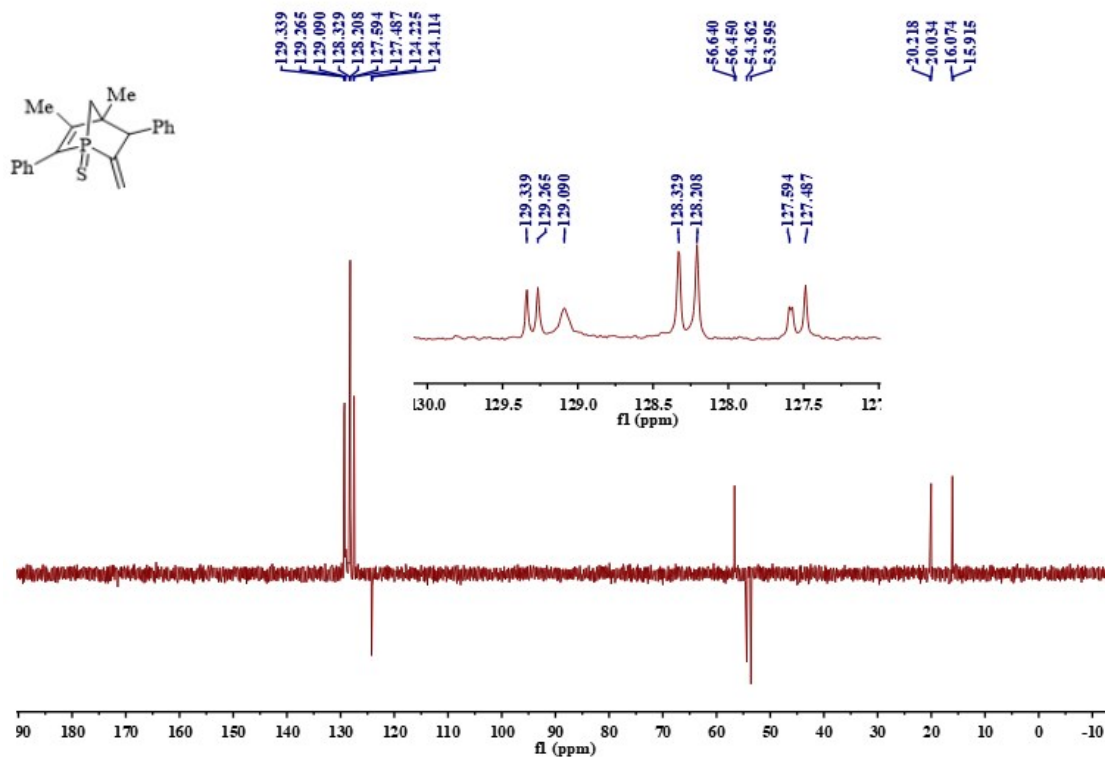

Dept135 (CDCl<sub>3</sub>, 75 MHz) NMR of *endo-4a*

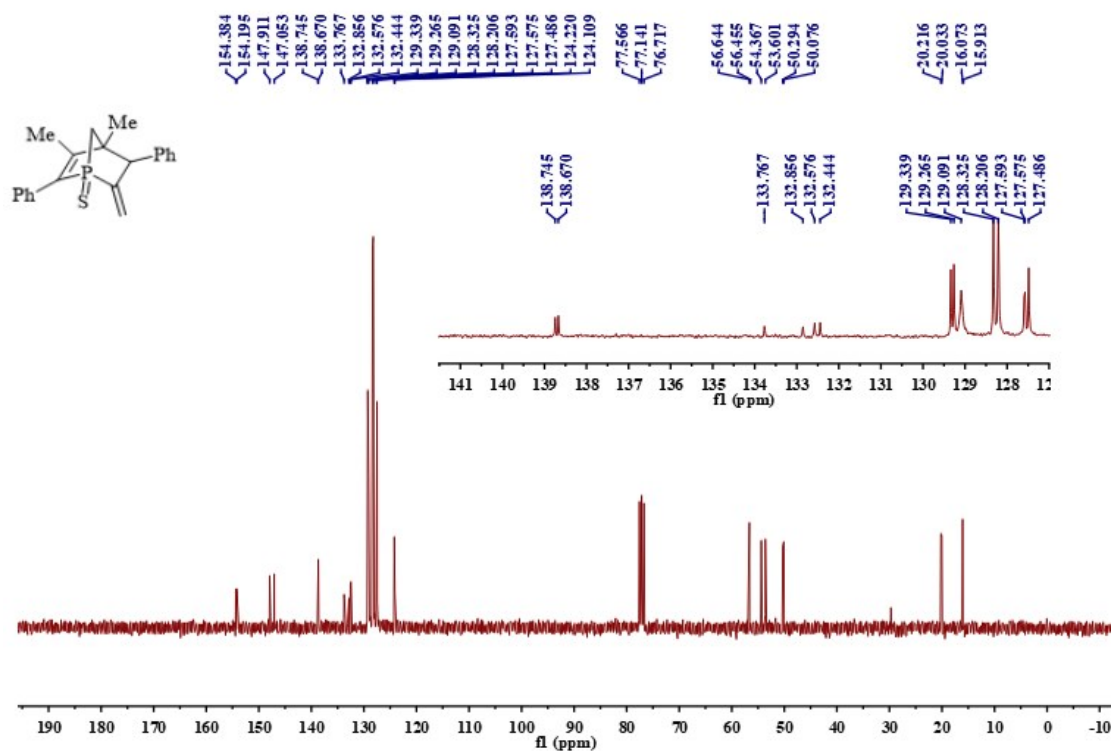

<sup>13</sup>C {<sup>1</sup>H} (CDCl<sub>3</sub>, 75 MHz) NMR of *endo-4a*

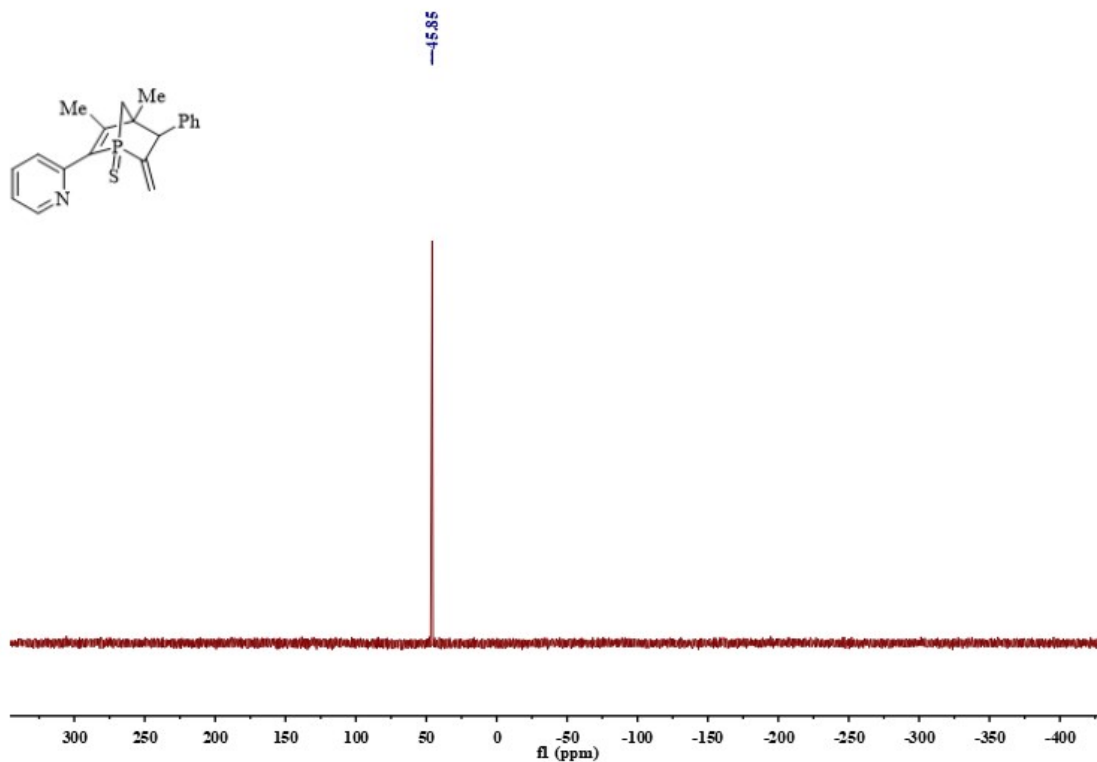

$^{31}\text{P}$  (CDCl<sub>3</sub>, 121 MHz) NMR of *exo-4b*

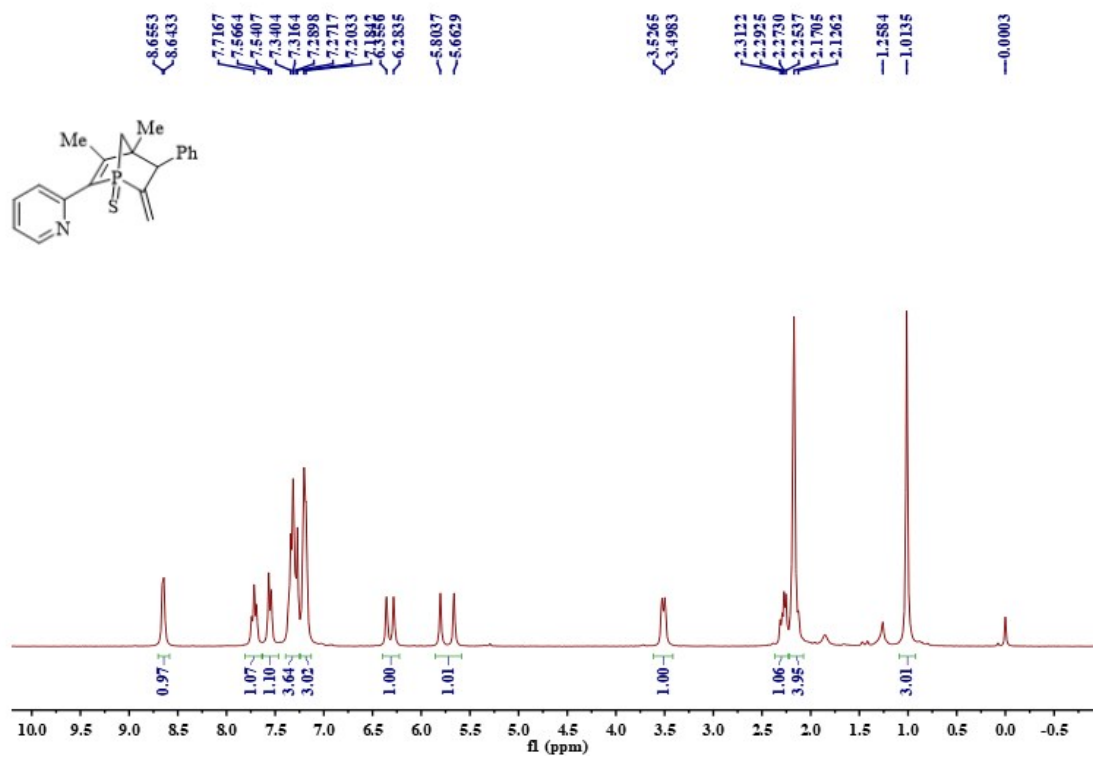

$^1\text{H}$  (CDCl<sub>3</sub>, 300 MHz) NMR of *exo-4b*

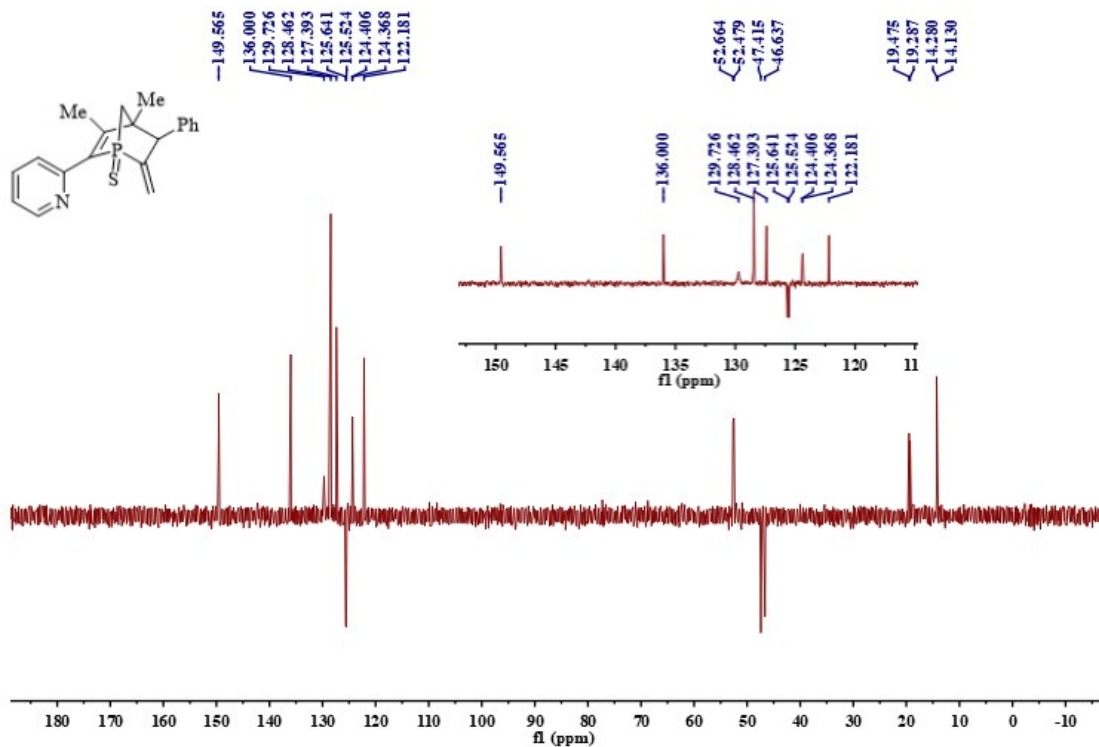

Dept135 (CDCl<sub>3</sub>, 75 MHz) NMR of *exo-4b*

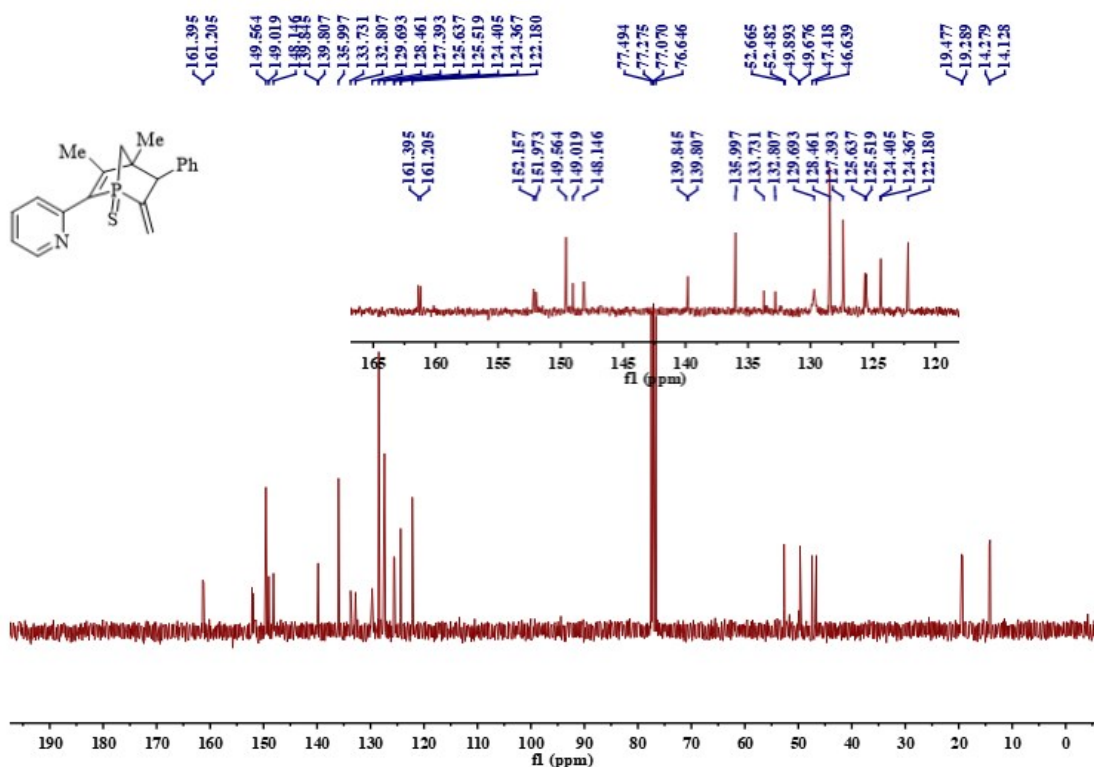

<sup>13</sup>C {<sup>1</sup>H} (CDCl<sub>3</sub>, 75 MHz) NMR of *exo-4b*

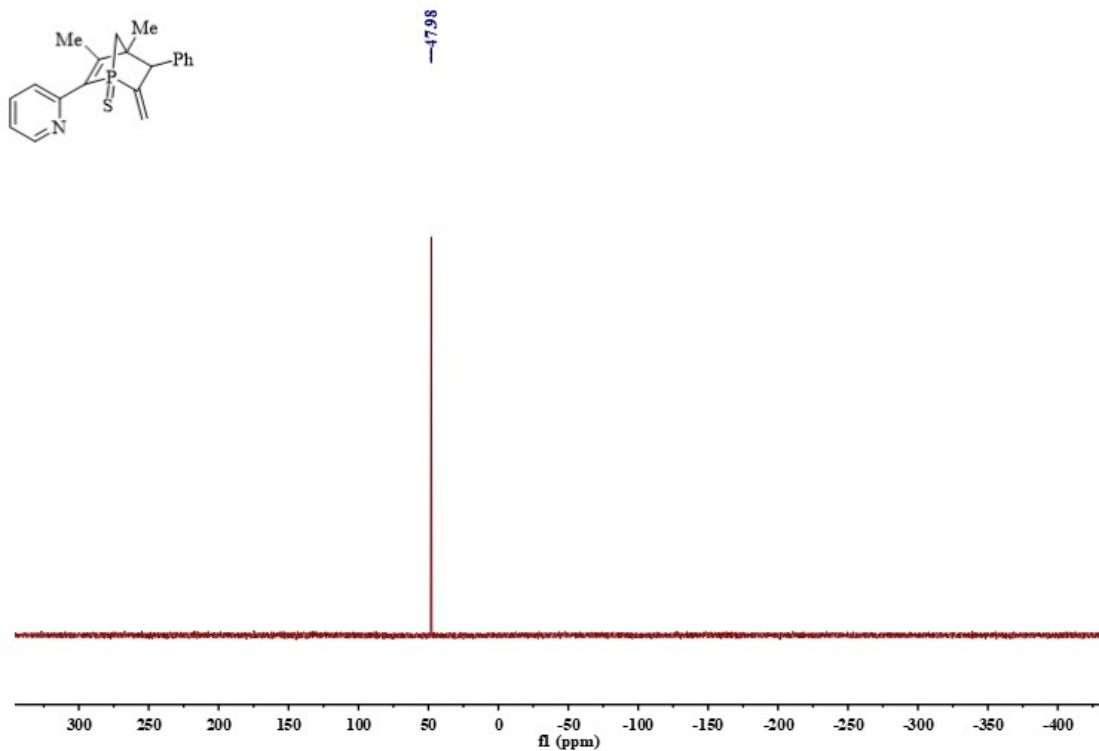

$^{31}\text{P}$  (CDCl<sub>3</sub>, 121 MHz) NMR of *endo-4b*

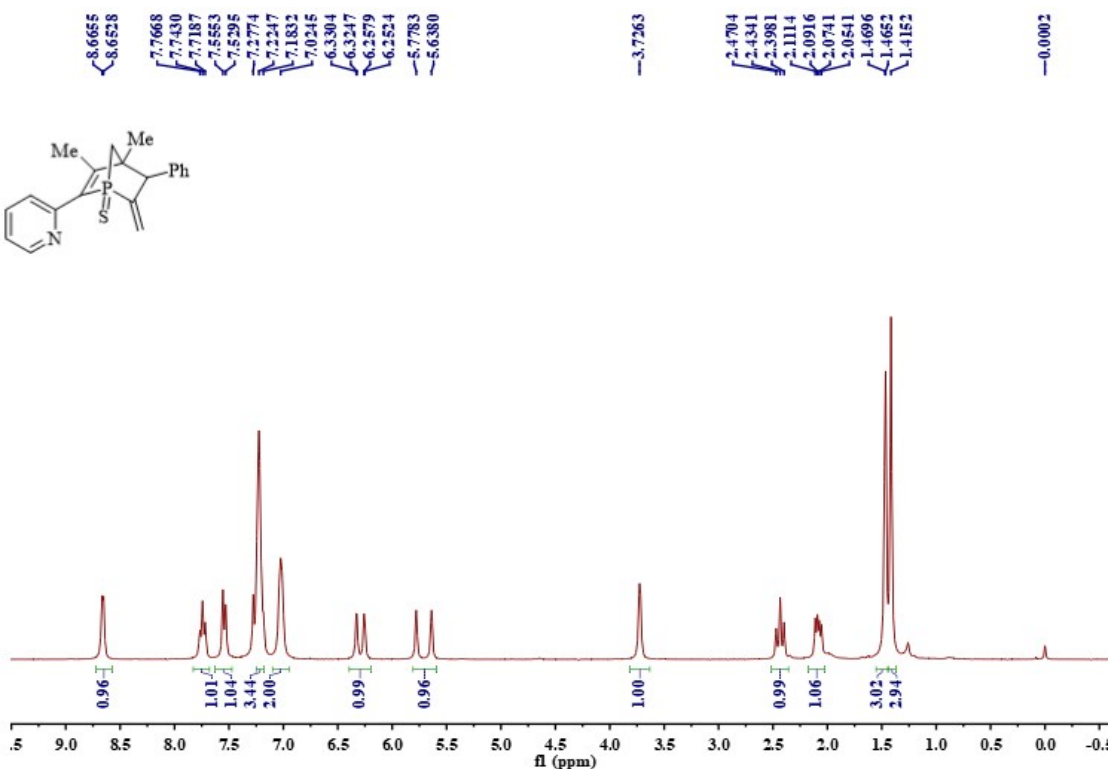

$^1\text{H}$  (CDCl<sub>3</sub>, 300 MHz) NMR of *endo-4b*

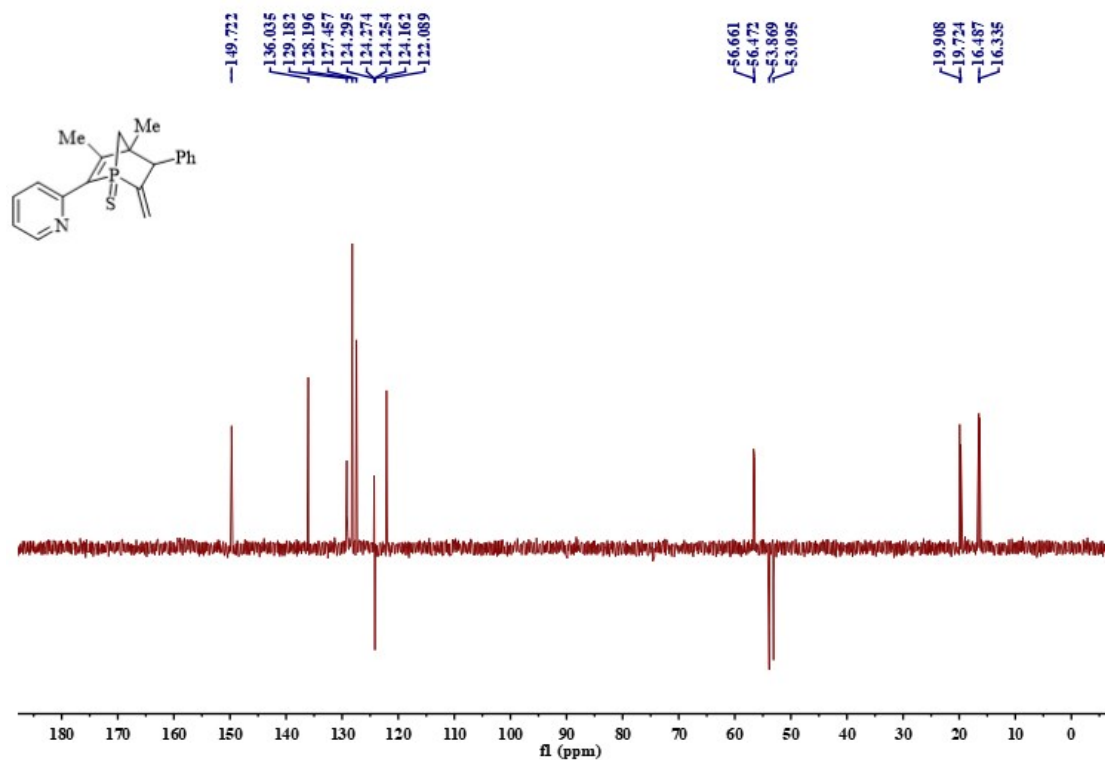

Dept135 (CDCl<sub>3</sub>, 75 MHz) NMR of *endo-4b*

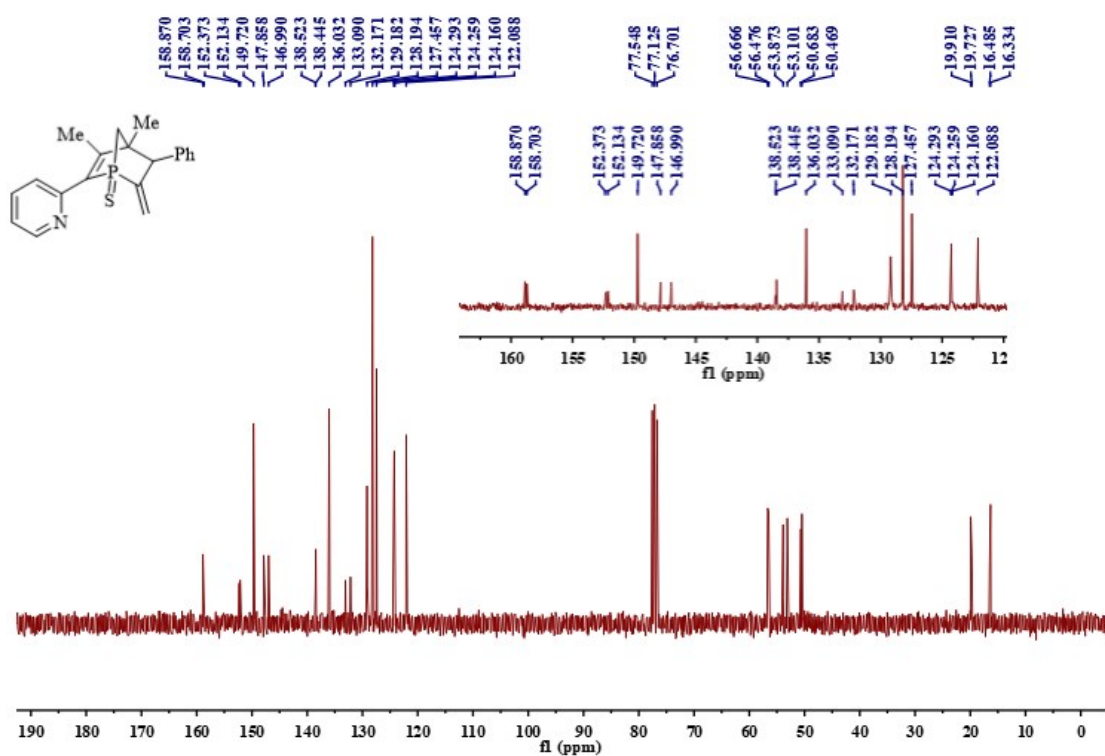

<sup>13</sup>C {<sup>1</sup>H} (CDCl<sub>3</sub>, 75 MHz) NMR of *endo-4b*

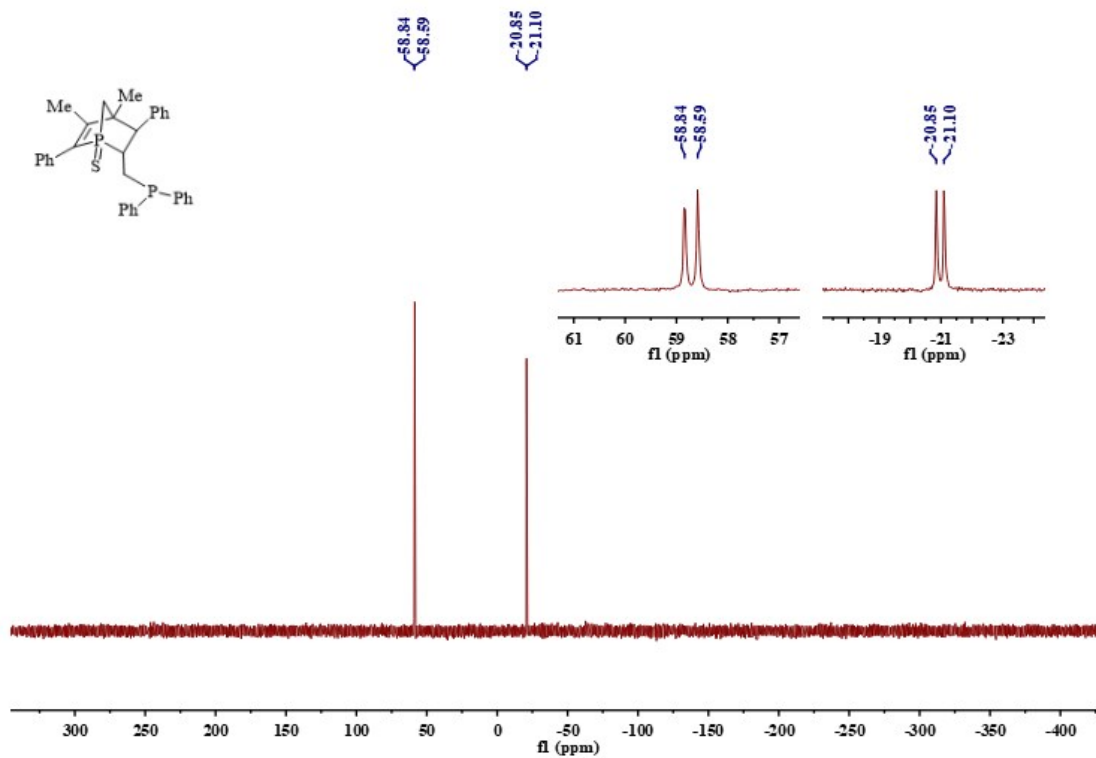

$^{31}\text{P}$  (CDCl<sub>3</sub>, 121 MHz) NMR of **5a**

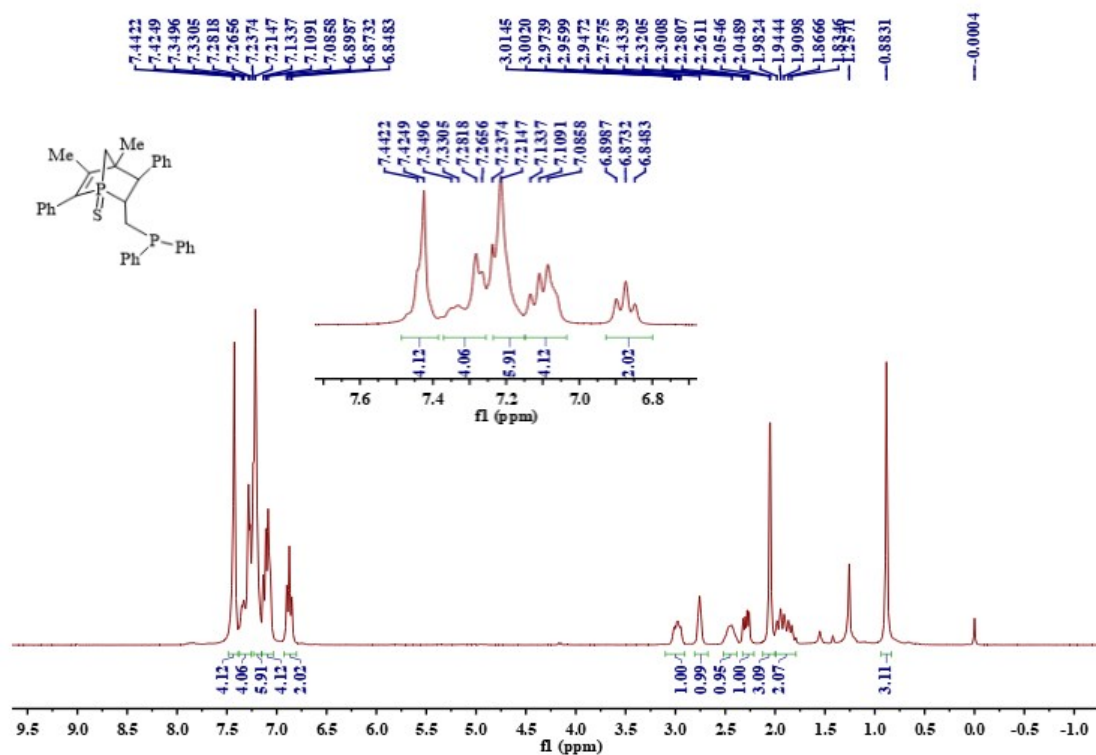

$^1\text{H}$  (CDCl<sub>3</sub>, 300 MHz) NMR of **5a**

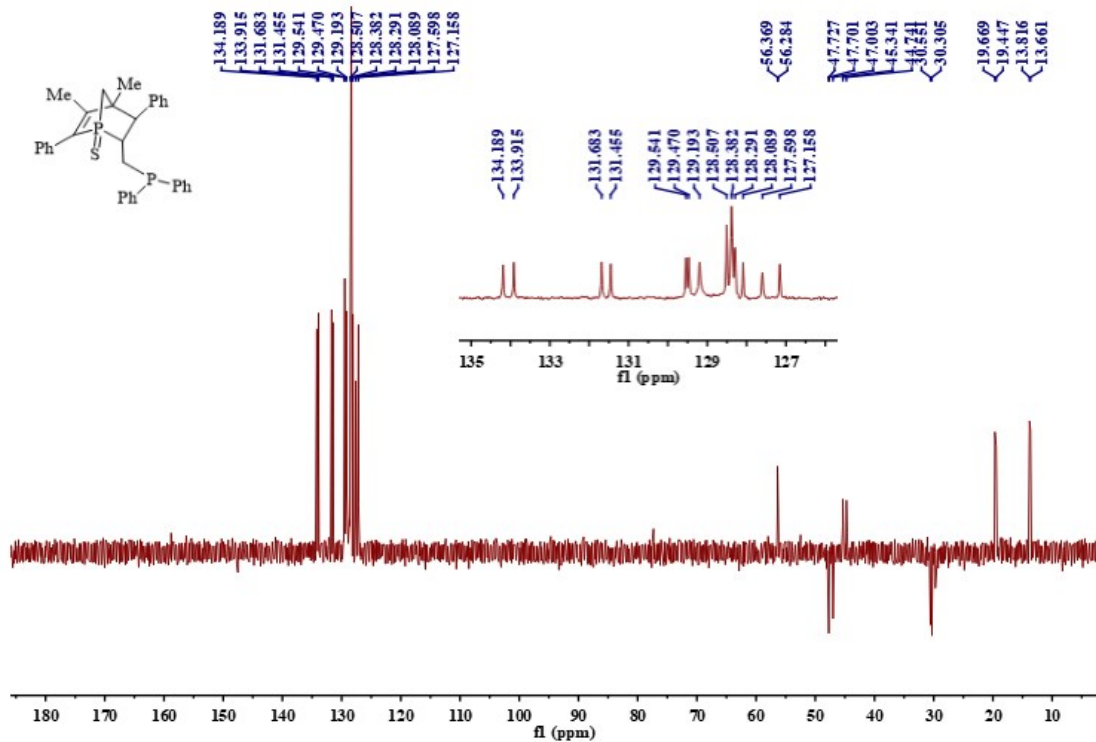

Dept135 (CDCl<sub>3</sub>, 75 MHz) NMR of **5a**

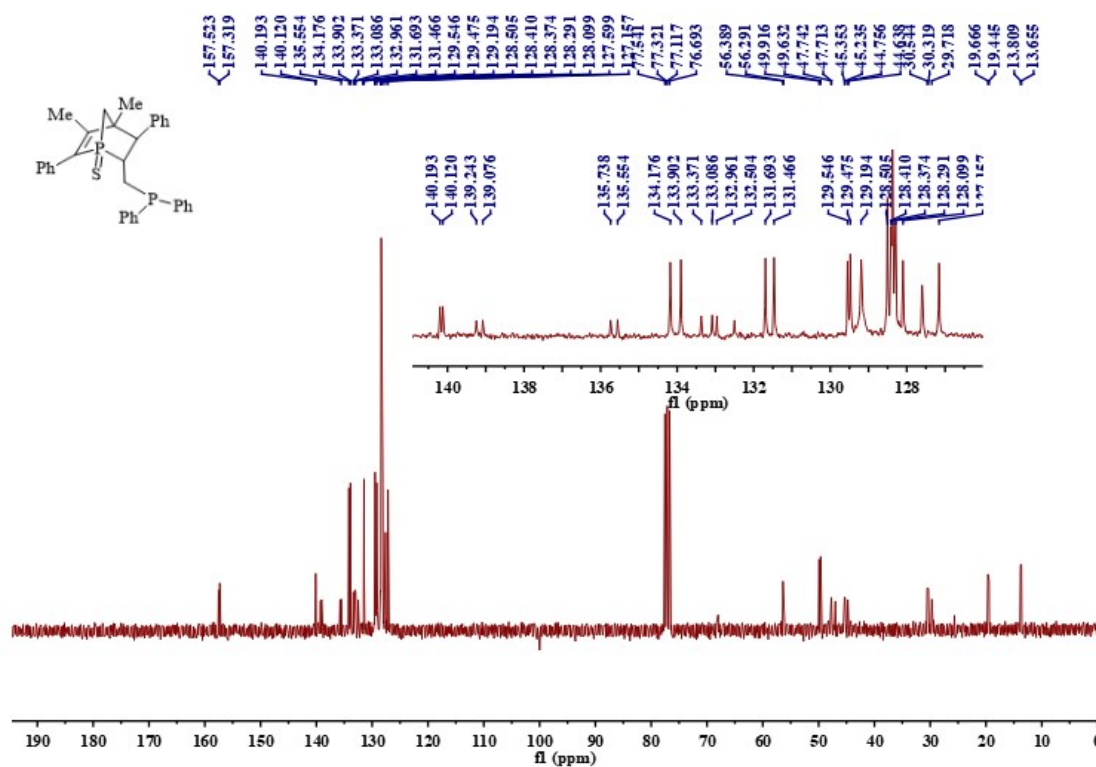

<sup>13</sup>C {<sup>1</sup>H} (CDCl<sub>3</sub>, 75 MHz) NMR of **5a**

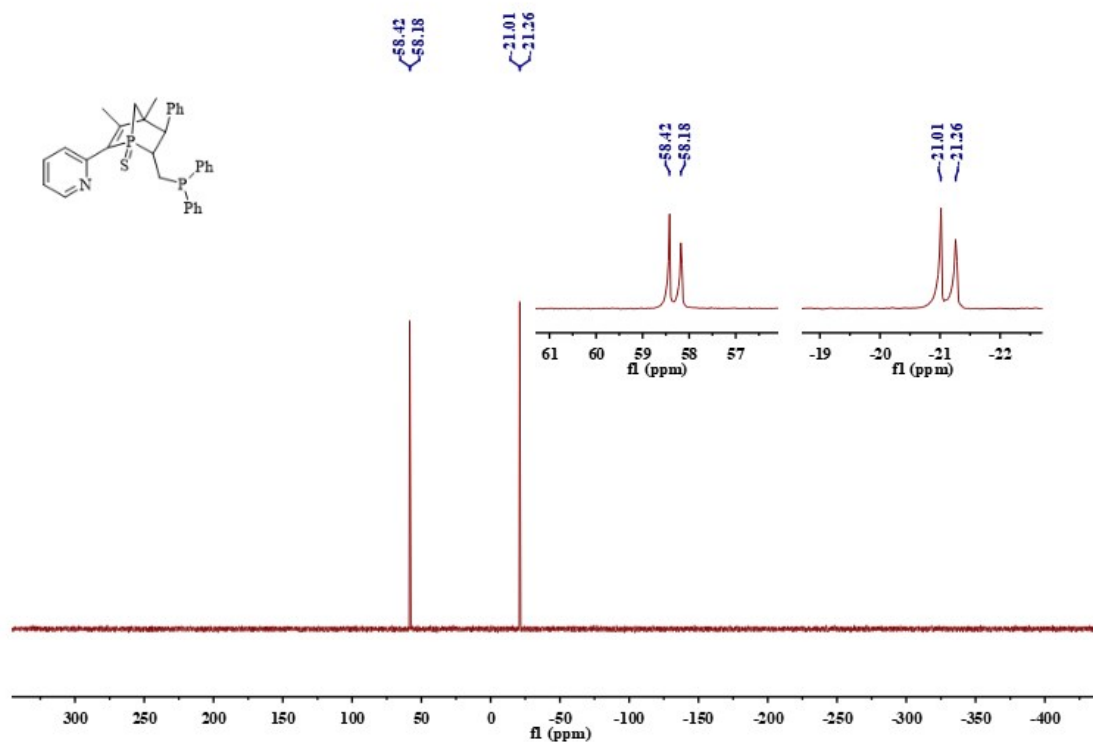

$^{31}\text{P}$  (CDCl<sub>3</sub>, 121 MHz) NMR of **5b**

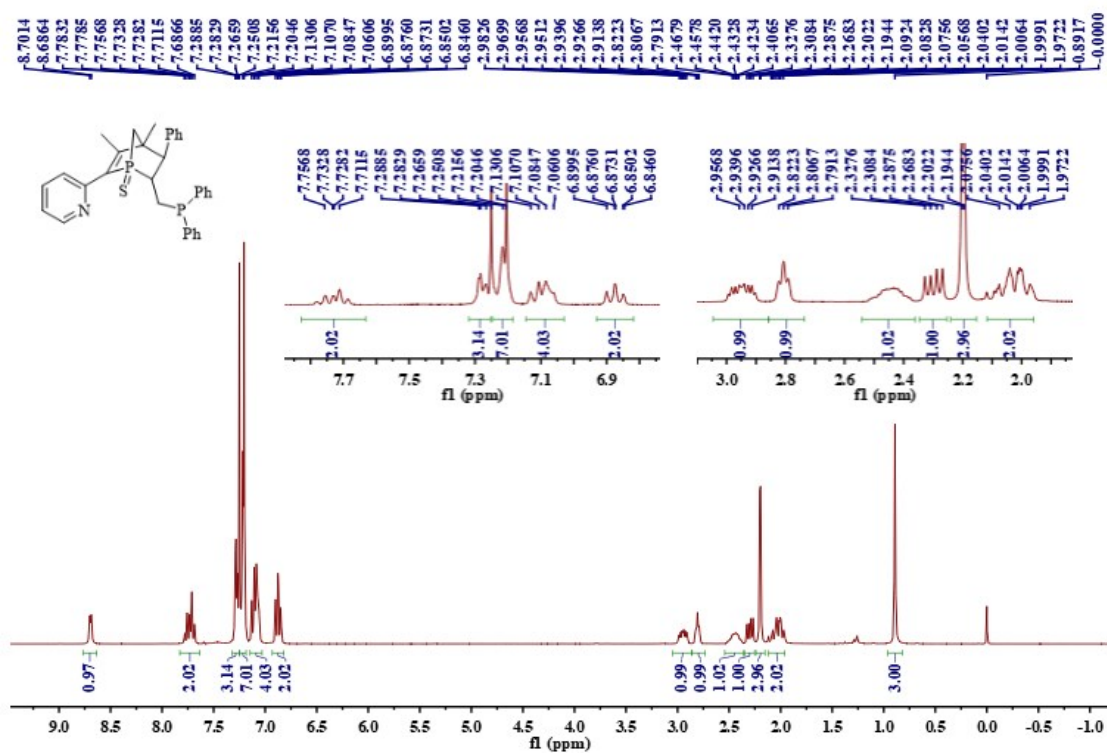

$^1\text{H}$  (CDCl<sub>3</sub>, 300 MHz) NMR of **5b**



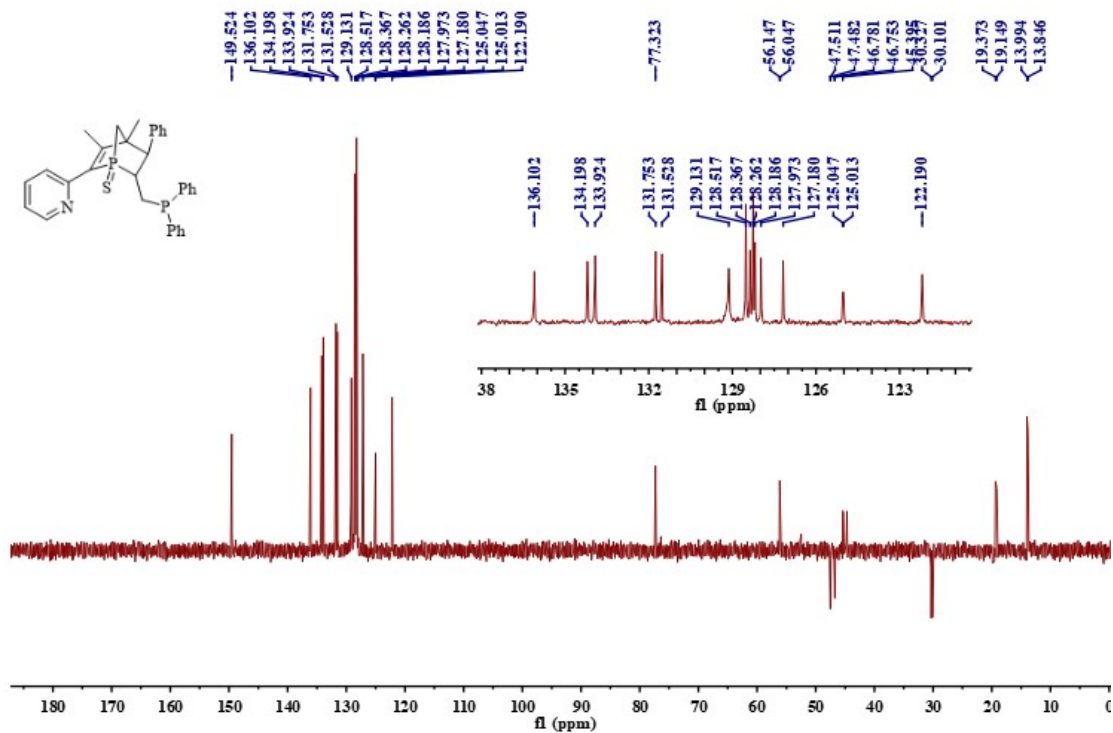

Dept135 (CDCl<sub>3</sub>, 75 MHz) NMR of **5b**

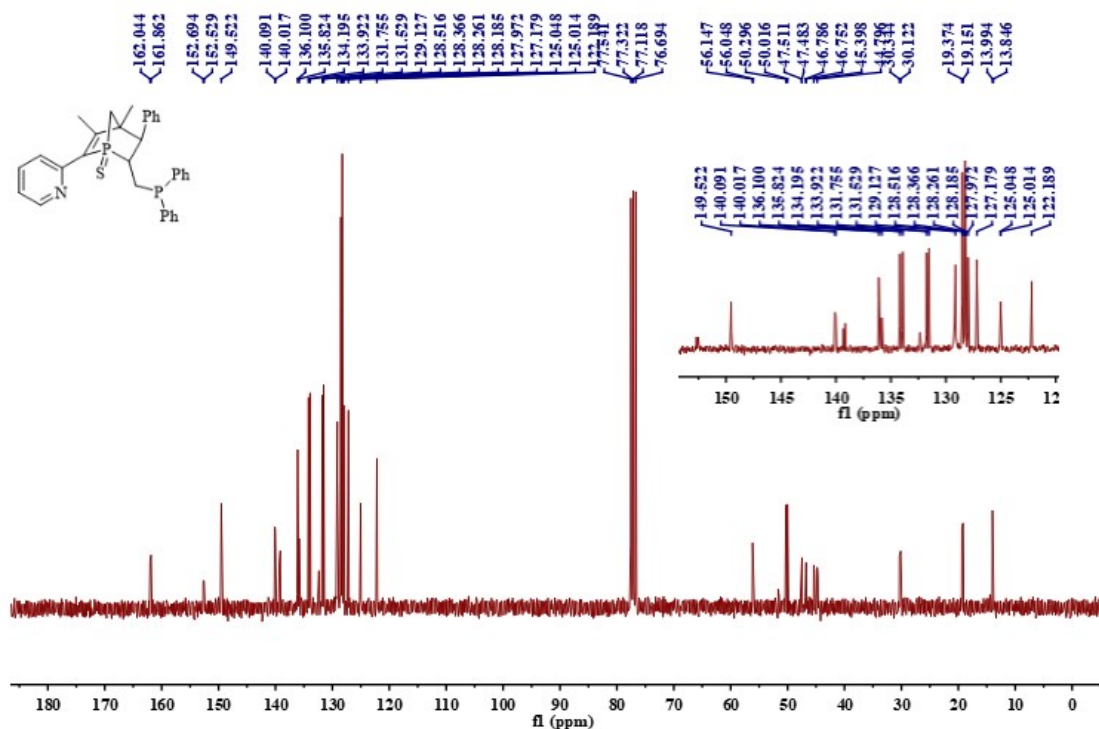

<sup>13</sup>C {<sup>1</sup>H} (CDCl<sub>3</sub>, 75 MHz) NMR of **5b**

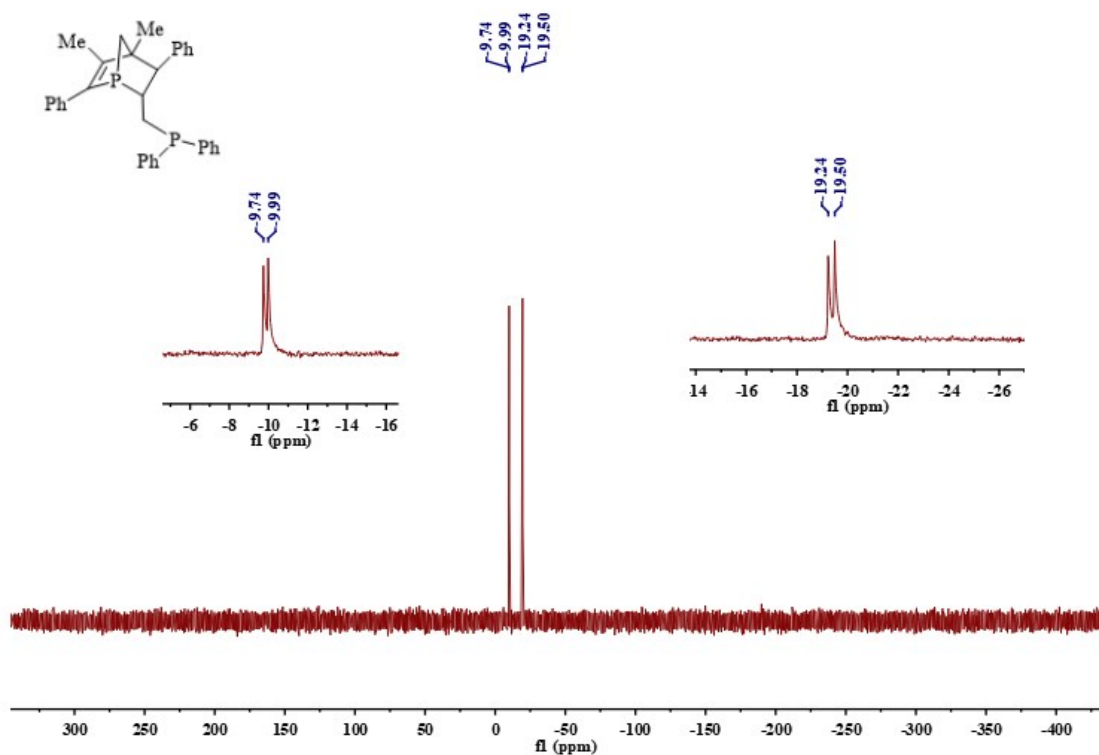

$^{31}\text{P}$  ( $\text{CDCl}_3$ , 121 MHz) NMR of **6a**

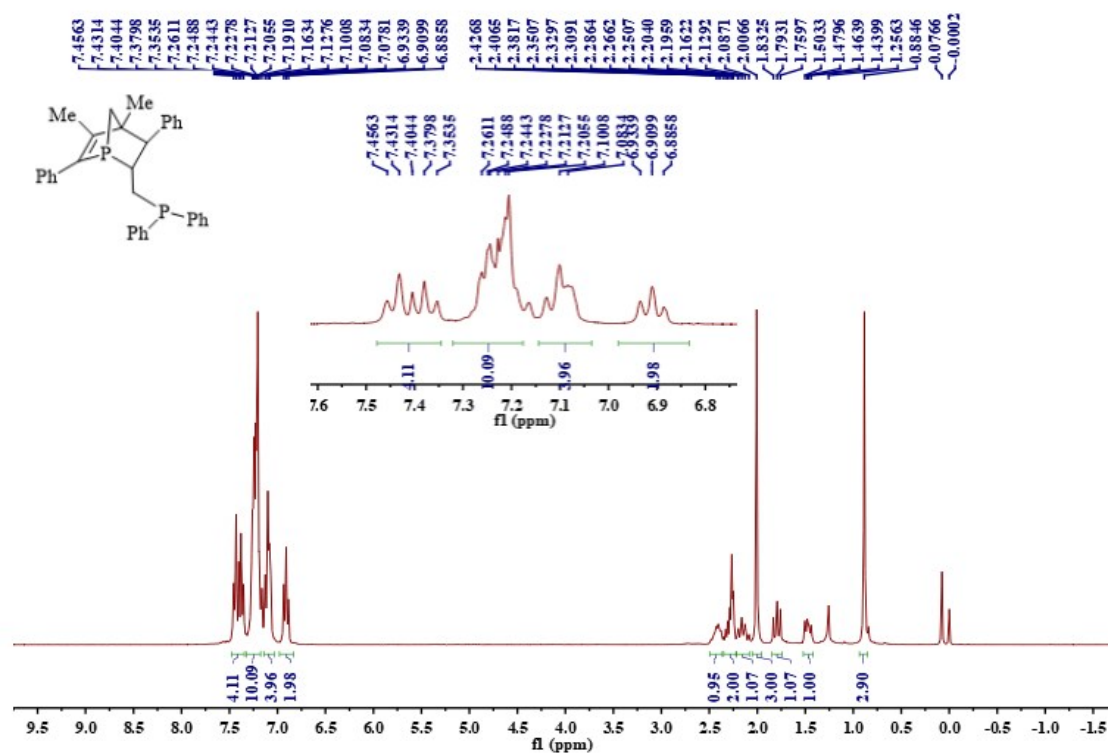

$^1\text{H}$  ( $\text{CDCl}_3$ , 300 MHz) NMR of **6a**

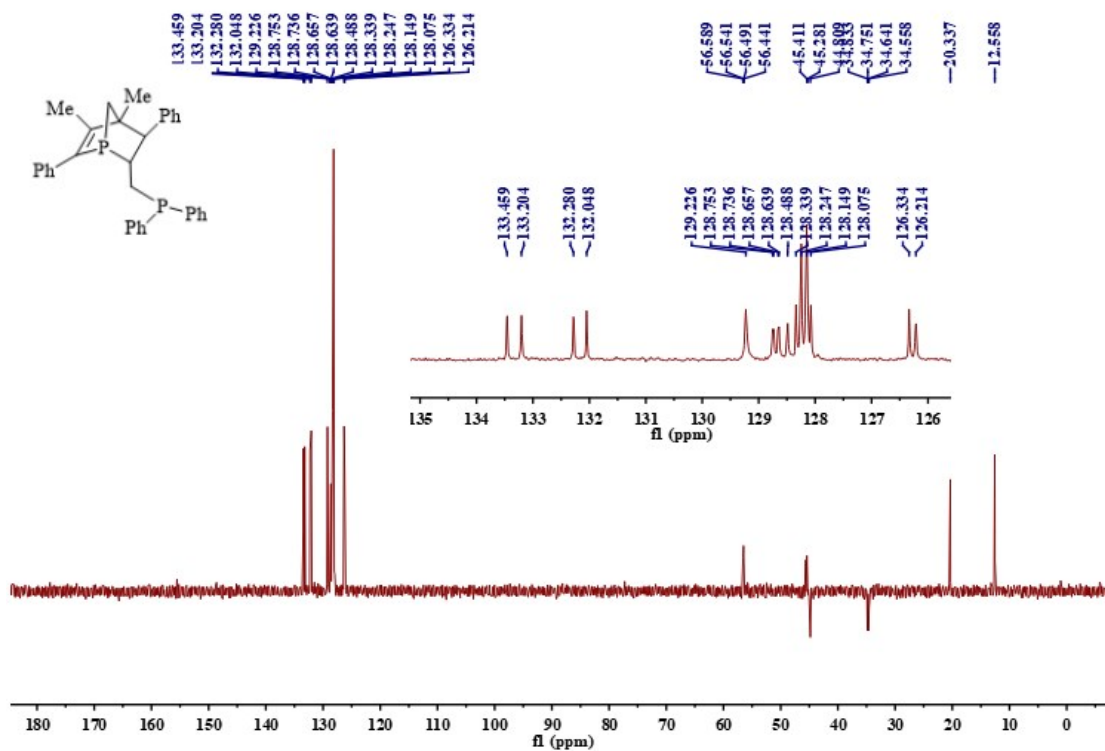

Dept135 (CDCl<sub>3</sub>, 75 MHz) NMR of **6a**

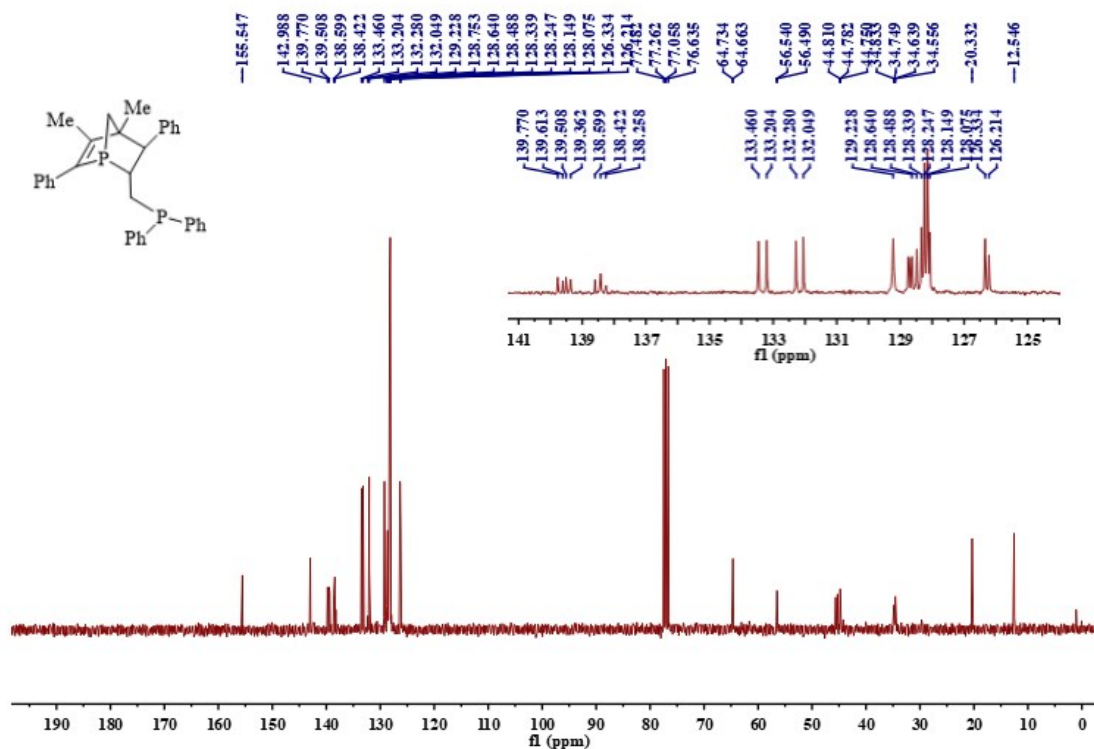

<sup>13</sup>C {<sup>1</sup>H} (CDCl<sub>3</sub>, 75 MHz) NMR of **6a**

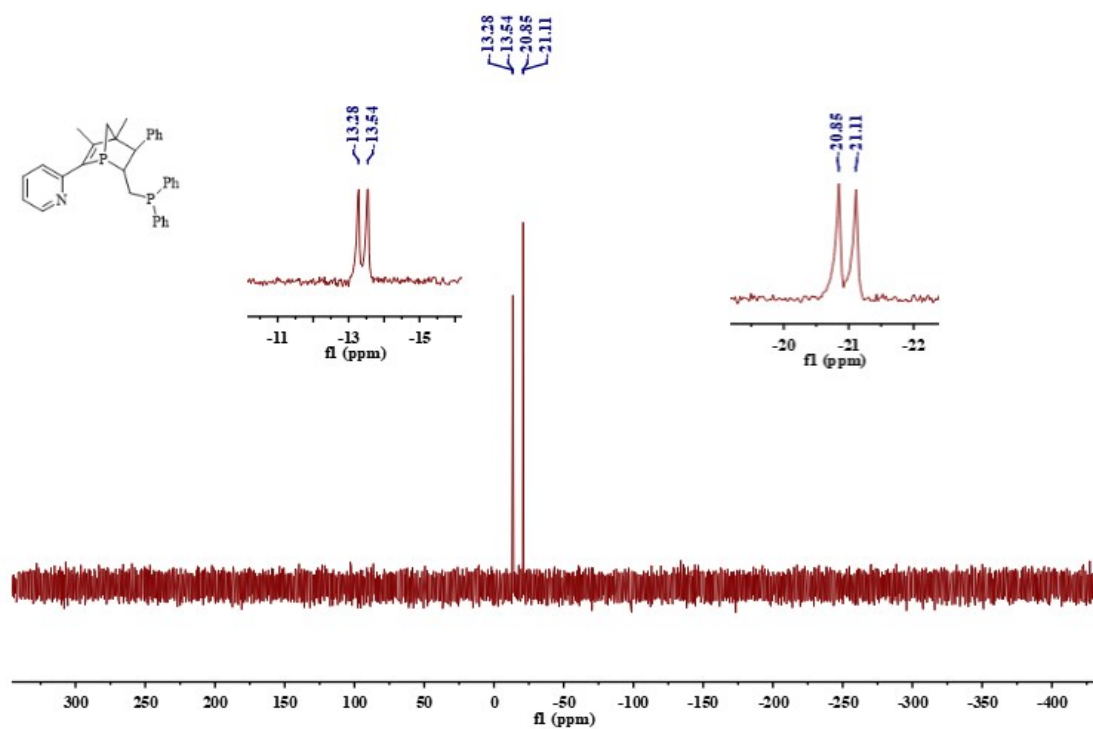

$^{31}\text{P}$  ( $\text{CDCl}_3$ , 121 MHz) NMR of **6b**

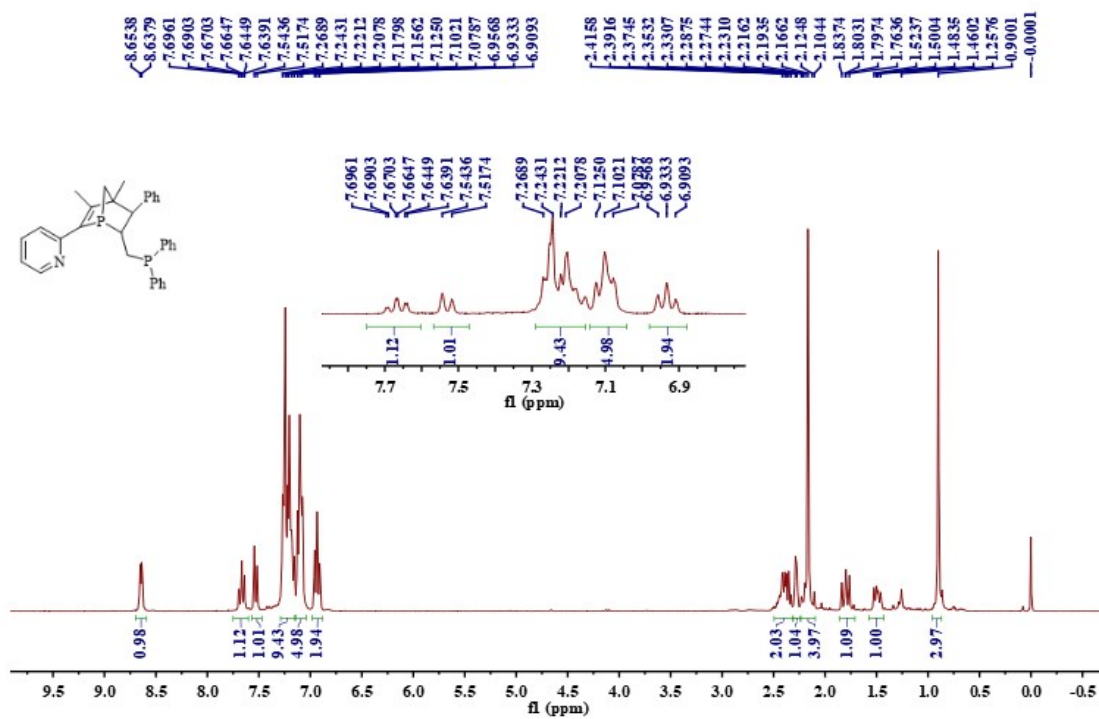

$^1\text{H}$  ( $\text{CDCl}_3$ , 300 MHz) NMR of **6b**

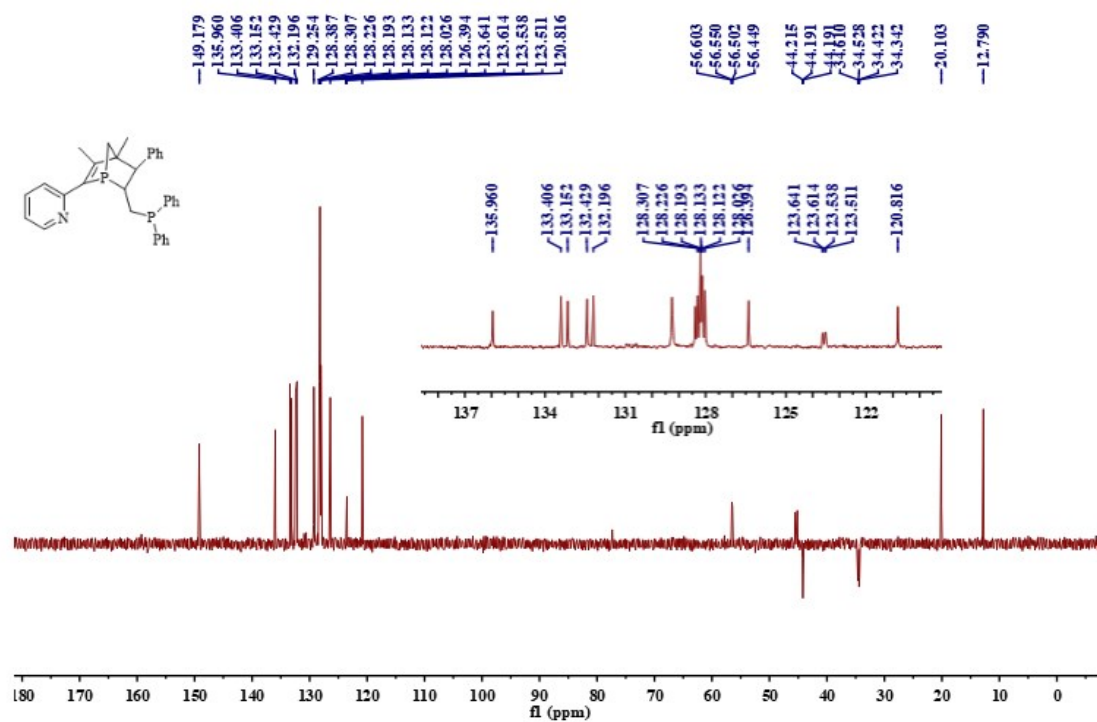

Dept135 (CDCl<sub>3</sub>, 75 MHz) NMR of **6b**

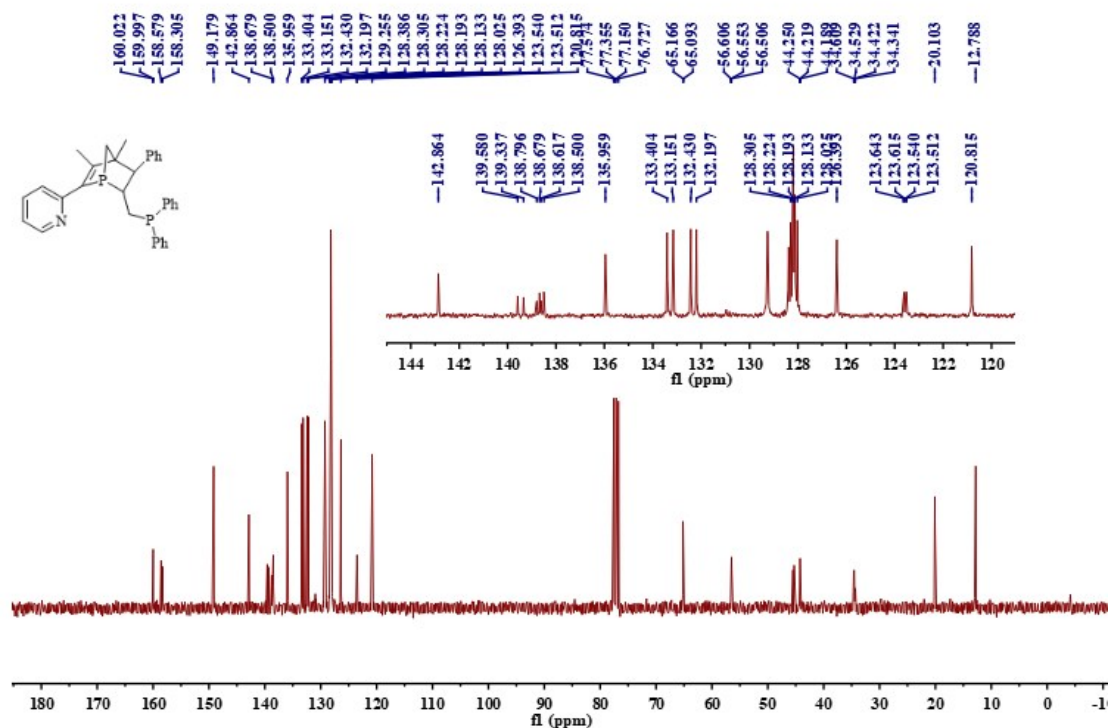

<sup>13</sup>C {<sup>1</sup>H} (CDCl<sub>3</sub>, 75 MHz) NMR of **6b**

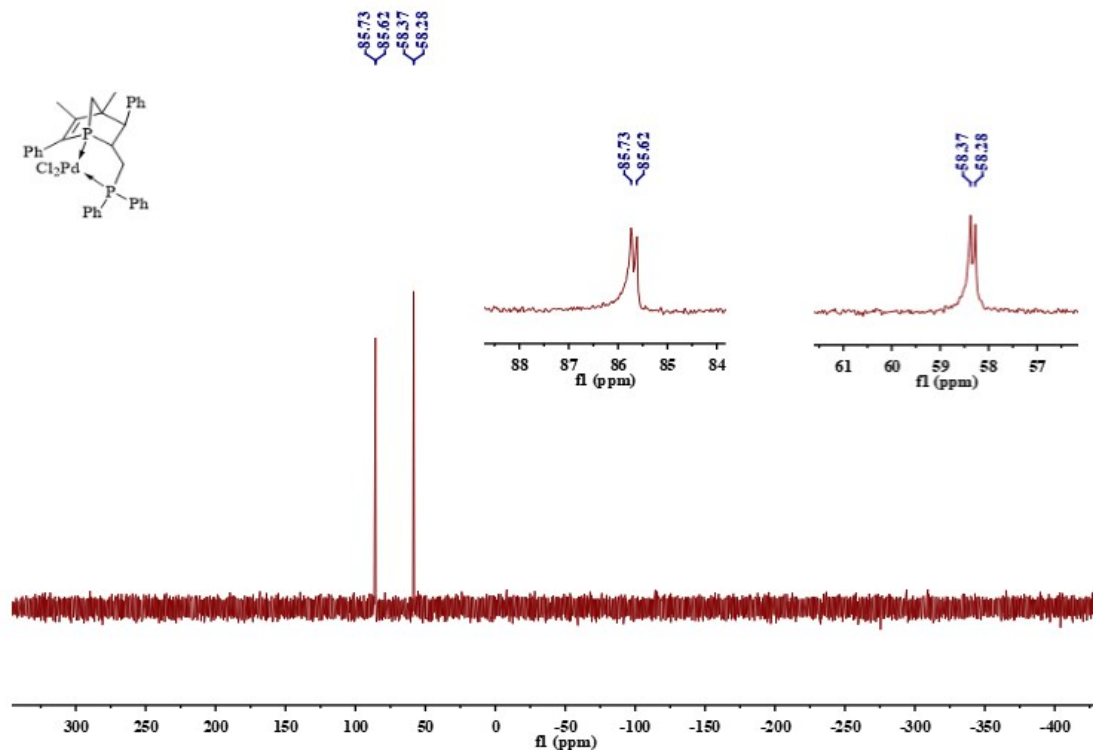

$^{31}\text{P}$  (( $\text{CD}_3$ ) $_2\text{SO}$ , 121 MHz) NMR of 7

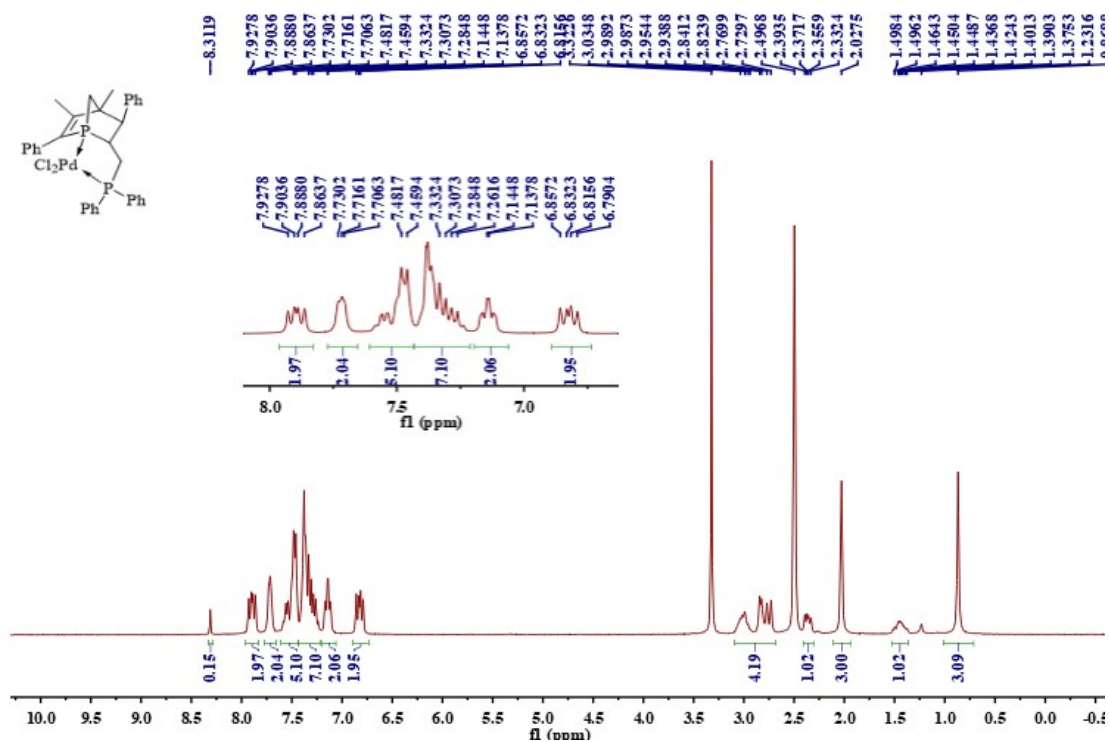

$^1\text{H}$  (( $\text{CD}_3$ ) $_2\text{SO}$ , 300 MHz) NMR of 7

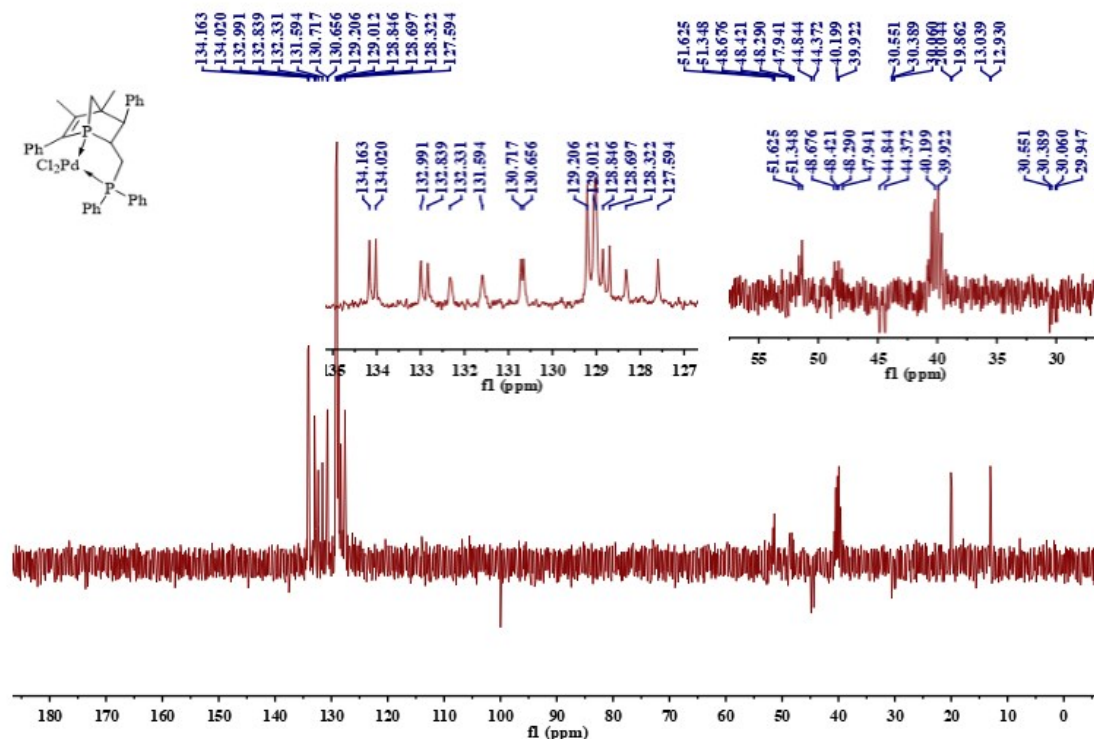

Dept135 ((CD<sub>3</sub>)<sub>2</sub>SO, 75 MHz) NMR of 7

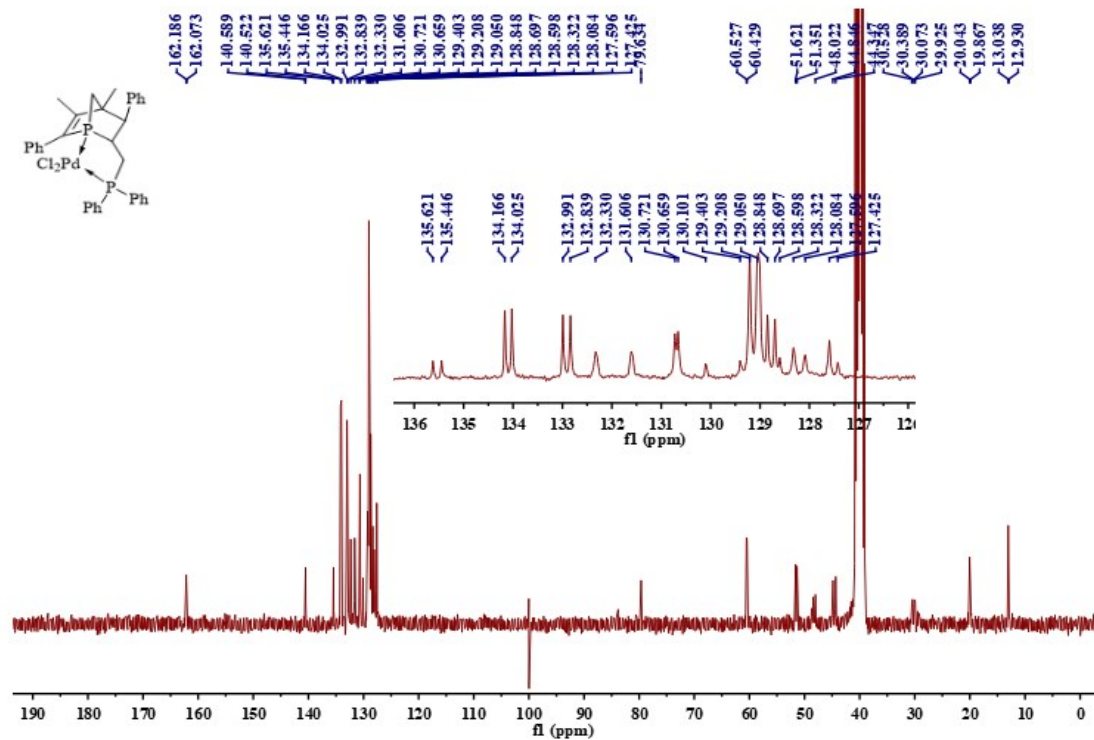

<sup>13</sup>C {<sup>1</sup>H} ((CD<sub>3</sub>)<sub>2</sub>SO, 75 MHz) NMR of 7

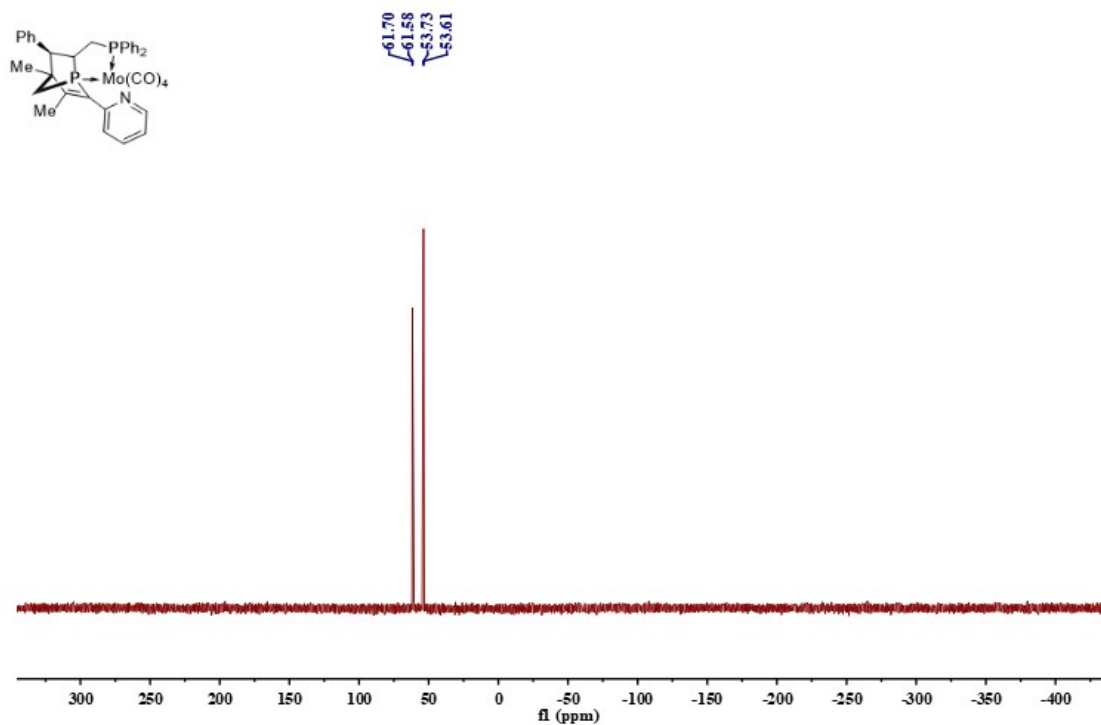

$^{31}\text{P}$  (CDCl<sub>3</sub>, 121 MHz) NMR of **8**

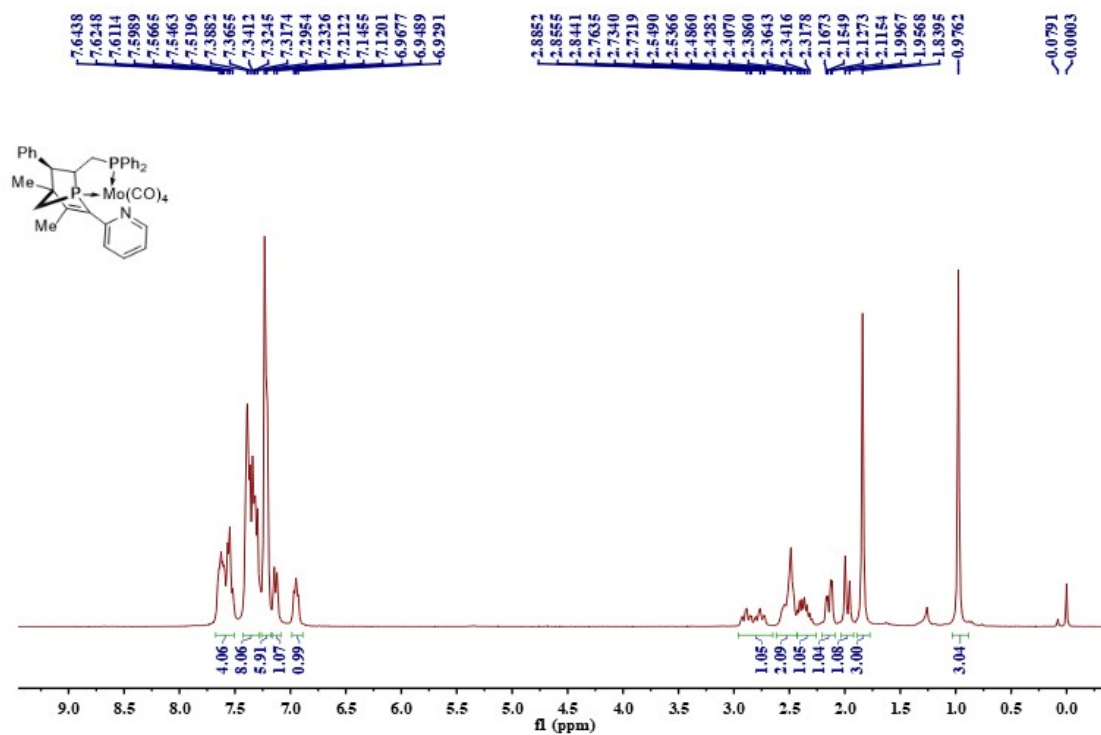

$^1\text{H}$  (CDCl<sub>3</sub>, 300 MHz) NMR of **8**



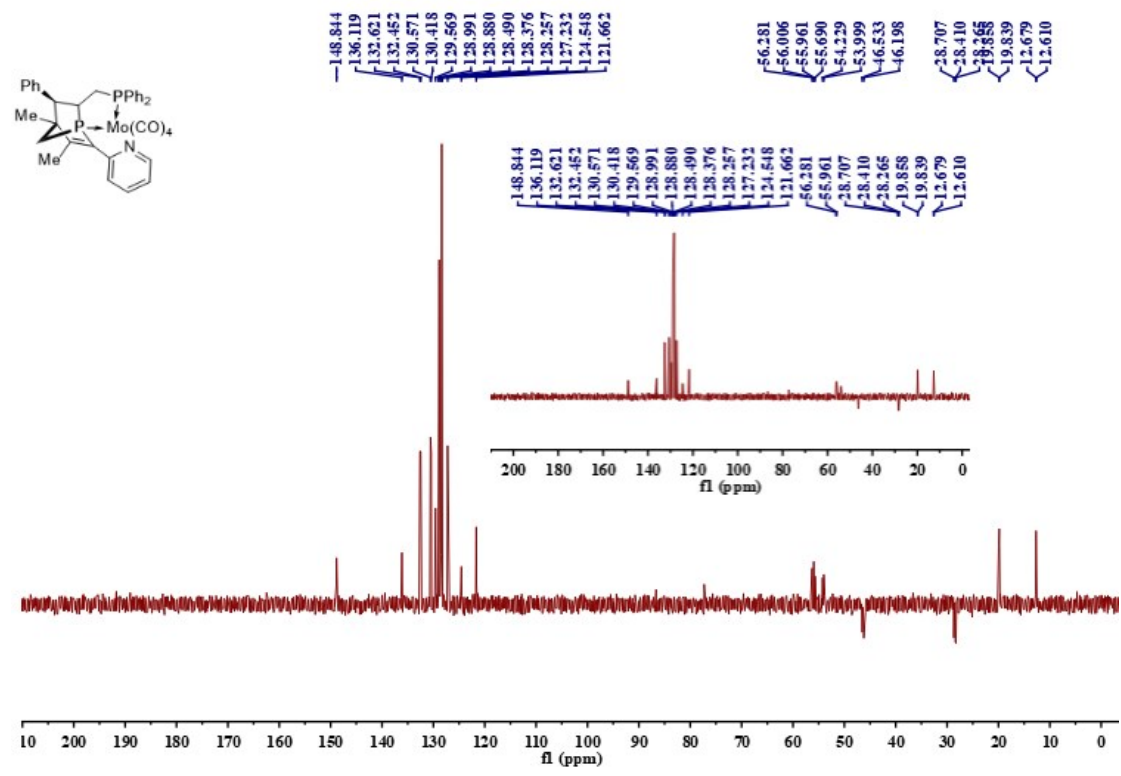

Dept135 (CDCl<sub>3</sub>, 75 MHz) NMR of **8**

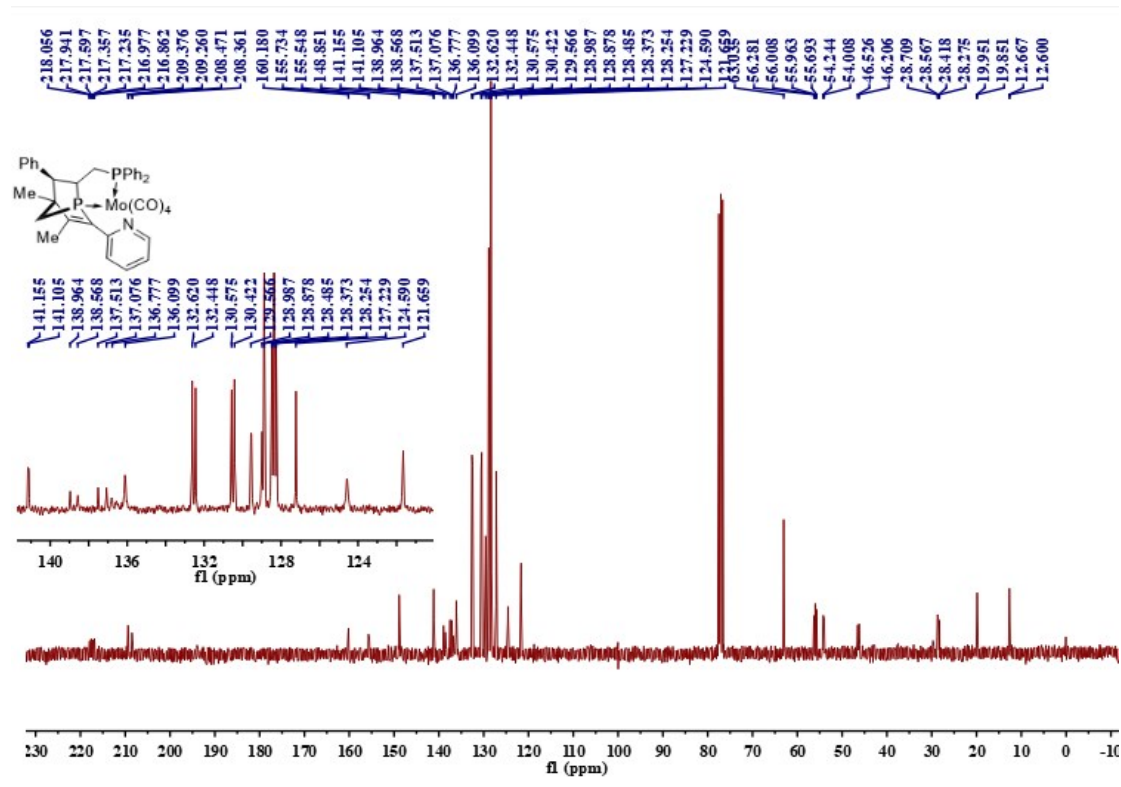

<sup>13</sup>C {<sup>1</sup>H} (CDCl<sub>3</sub>, 75 MHz) NMR of **8**

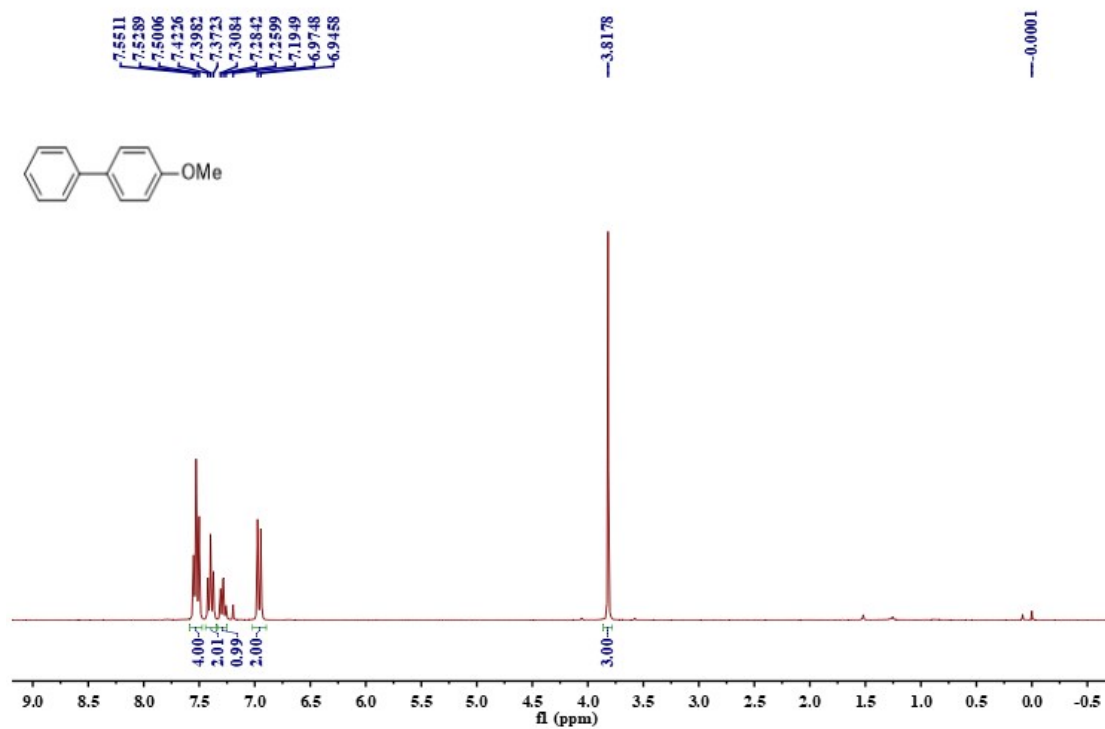

$^1\text{H}$  ( $\text{CDCl}_3$ , 300 MHz) NMR of **9**

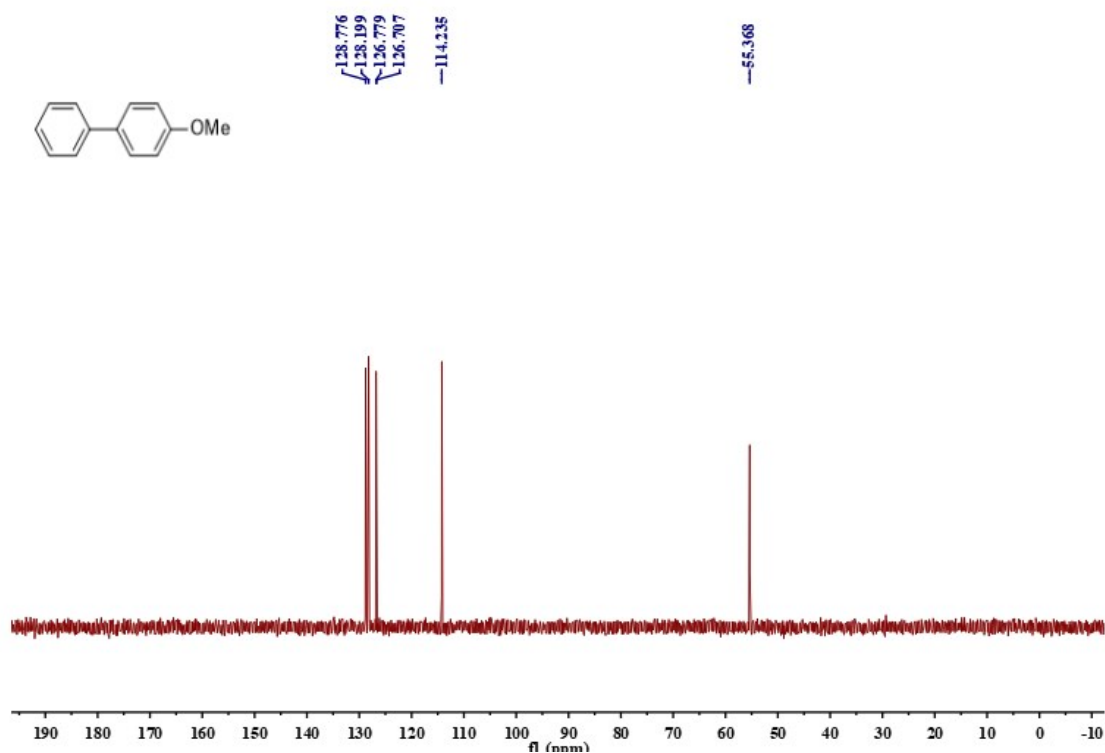

Dept135 ( $\text{CDCl}_3$ , 75 MHz) NMR of **9**

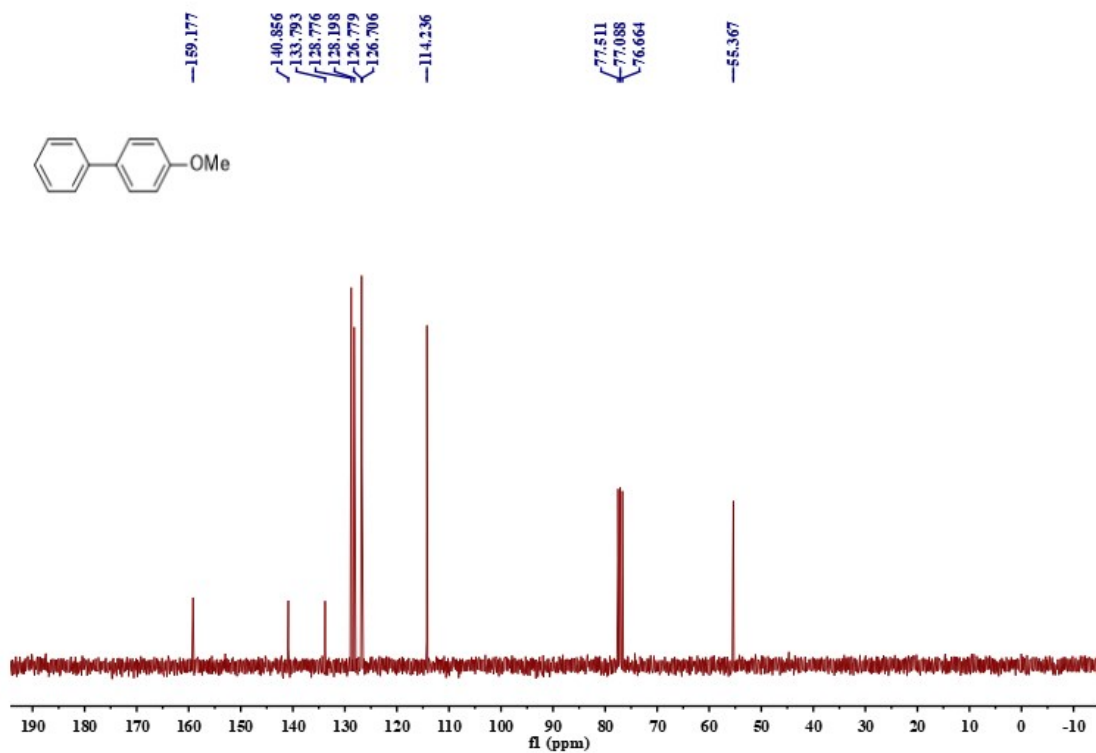

$^{13}\text{C}$   $\{^1\text{H}\}$  ( $\text{CDCl}_3$ , 75 MHz) NMR of **9**
